# Supplementary material for: Effective synthesis, development and application of a highly fluorescent cyanine dye for antibody conjugation and microscopy imaging
Source: Royal Society of Chemistry journal article supplement (doi:10.1039/d3ob01471a), 2023-01-01
Supplement: d3ob01471a1.pdf [file d3ob01471a1.pdf]

Supplementary Information for

***Effective Synthesis, Development and Application of a Highly  
Fluorescent Cyanine Dye for Antibody Conjugation and Microscopy  
Imaging***

Dénes Szepesi Kovács,<sup>a,b,c,‡</sup> Bence Kontra,<sup>d,e,f</sup> Balázs Chiovini,<sup>g</sup> Dalma Müller,<sup>f,h,i</sup> Estilla Zsófia Tóth,<sup>c,f,j</sup>  
Péter Ábrányi-Balogh,<sup>a,b,c</sup> Lucia Wittner,<sup>c,i</sup> György Várady,<sup>k</sup> Gábor Turczel,<sup>l</sup> Ödön Farkas,<sup>m</sup>  
Michael C. Owen,<sup>n,o</sup> Gergely Katona,<sup>g</sup> Balázs Győrffy,<sup>c,h,i</sup> György Miklós Keserű,<sup>a,b,c,\*</sup>  
Zoltán Mucsi,<sup>d,e,n,\*</sup> Balázs J. Rózsa,<sup>d,g,p,\*</sup> Ervin Kovács<sup>e,q,\*‡</sup>

<sup>a</sup> Medicinal Chemistry Research Group, HUN-REN Research Centre for Natural Sciences, H-1117 Budapest, Hungary

<sup>b</sup> Department of Organic Chemistry and Technology, Budapest University of Technology and Economics, H-1111 Budapest, Hungary

<sup>c</sup> National Laboratory for Drug Research and Development, H-1117 Budapest, Hungary

<sup>d</sup> Brain Vision Center, H-1094 Budapest, Hungary

<sup>e</sup> Femtonics Ltd., H-1094 Budapest, Hungary

<sup>f</sup> Semmelweis University Doctoral School, H-1085 Budapest Hungary

<sup>g</sup> Faculty of Information Technology and Bionics, Pázmány Péter Catholic University, H-1444 Budapest, Hungary

<sup>h</sup> Oncology Biomarker Research Group, HUN-REN Research Centre for Natural Sciences, H-1117 Budapest, Hungary

<sup>i</sup> Department of Bioinformatics, Semmelweis University, H-1094, Budapest, Hungary

<sup>j</sup> Integrative Neuroscience Research Group, HUN-REN Research Centre for Natural Sciences, H-1117 Budapest, Hungary

<sup>k</sup> Molecular Cell Biology Research Group, HUN-REN Research Centre for Natural Sciences, H-1117 Budapest, Hungary

<sup>l</sup> NMR Research Laboratory, HUN-REN Research Centre for Natural Sciences, H-1117 Budapest, Hungary

<sup>m</sup> Department of Organic Chemistry, Eötvös Loránd University, H-1117 Budapest, Hungary

<sup>n</sup> Institute of Chemistry, University of Miskolc, Miskolc H-3515, Hungary

<sup>o</sup> Higher Education and Industrial Cooperation Centre, University of Miskolc, Miskolc H-3515, Hungary

<sup>p</sup> Laboratory of 3D Functional Network and Dendritic Imaging, Institute of Experimental Medicine, H-1083 Budapest, Hungary

<sup>q</sup> Polymer Chemistry and Physics Research Group, HUN-REN Research Centre for Natural Sciences, H-1117 Budapest, Hungary; E-mail: kovacs.ervin@ttk.hu, Tel: +3613826570

‡These authors contributed equally.

|                                                       |     |
|-------------------------------------------------------|-----|
| Experimental Methods.....                             | S2  |
| Computational Methods .....                           | S2  |
| Synthesis of cyanine with azide functional group..... | S5  |
| SDS-PAGE and densitometry .....                       | S18 |
| Photophysical measurements .....                      | S18 |
| Trastuzumab reconjugation with DBPD-CO .....          | S20 |
| Photophysical results .....                           | S22 |
| Raw computational data .....                          | S25 |
| References.....                                       | S74 |

## Experimental Methods

All chemical reagents and solvents were purchased from Merck/Sigma Aldrich, ThermoFisher, or VWR International and used as received. NMR solvents were purchased from Eurisotop. Trastuzumab antibody was from Genentech Inc.

Reactions were monitored by LC-MS (Shimazu MS2020, Supelco Ascentis, 2.0 × 50 mm, 2.1 μm C18 column; using injection volume of 1 μl; a linear gradient of 5–98% MeCN/H<sub>2</sub>O, with a constant 0.1% v/v TFA additive. Each run was 6 min in duration, at a flow rate of 0.8 ml min<sup>-1</sup>; ESI, and the positive ion mode was also used. Reaction products were purified by gradient-elution preparative HPLC (HPLC Gilson 333 instrument, with UV detection at 220 nm) on a Phenomenex Gemini C18, 250×50.00 mm; 10 μm particle size, 110A column, using 0.2% v/v TFA in water and acetonitrile as the mobile phase components.

<sup>1</sup>H NMR and <sup>13</sup>C NMR spectra were recorded in DMSO-*d*<sub>6</sub> solution at room temperature, on a Varian Unity Inova 600 spectrometer (at 600 MHz and 141 MHz for <sup>1</sup>H and <sup>13</sup>C/APT NMR spectra, respectively), and on a Varian Unity Inova 400 spectrometer (at 400 MHz and 101 MHz for <sup>1</sup>H and <sup>13</sup>C NMR spectra, respectively). All chemical shifts are quoted in parts per million (ppm), measured from the center of the signal except in the case of multiplets, which are quoted as a range. <sup>1</sup>H NMR and <sup>13</sup>C chemical shifts are referenced to the residual solvent peak of (CD<sub>3</sub>)<sub>2</sub>SO (<sup>1</sup>H referenced to 2.50 ppm and <sup>13</sup>C referenced to 39.52 ppm) or to TMS as the internal standard. Coupling constants are given with an accuracy of 0.1 Hz. Splitting patterns are abbreviated as follows: singlet (s), doublet (d), triplet (t), quartet (q), multiplet (m), broad singlet (bs) and combinations thereof. Assignment of spectra was aided by 2D NMR spectroscopy (<sup>1</sup>H-<sup>13</sup>C HSQC and HMBC).

High-resolution mass spectrometry (HRMS) analysis was performed on a Sciex TripleTOF 5600+ high-resolution tandem mass spectrometer equipped with DuoSpray ion source. Electrospray ionization was applied in the positive ion detection mode. Samples were dissolved in acetonitrile and flow-injected into 50% acetonitrile in water, at a flow rate of 0.2 mL/min. The resolution of the mass spectrometer was 35 000.

## Computational Methods

All theoretical computations were carried out with the Gaussian16 program package (G16)<sup>1</sup>, using standard convergence criteria for the gradients of the root mean square (RMS) Force, Maximum Force, RMS displacement, and maximum displacement vectors ( $3.0 \times 10^{-4}$ ,  $4.5 \times$

$10^{-4}$ ,  $1.2 \times 10^{-3}$  and  $1.8 \times 10^{-3}$ ). Optimization and frequency calculations were carried out with the B3LYP method<sup>2</sup> using the 6-31G(d,p) basis set. The vibrational frequencies were computed at the same levels of theory, to confirm that all structures resided at minima on their potential energy hypersurfaces. Thermodynamic functions electronic energy (U), enthalpy (H), Gibbs' free energy (G) and entropy (S) were computed at 298.15 K. Reported values were obtained by using the Polarizable Continuum Model (PCM) using the integral equation formalism variant (IEFPCM) to model the solvent effect, using the default settings of G16 ( $\epsilon = 78.3553$  for water)<sup>3,4</sup>. To predict the wavelengths of the probes reliably, the vertical excitation was modelled by the TDB3LYP/6-31G(d,p) level of theory. The wavelengths of fluorescence emission was modelled by using geometry optimization obtained at the TD-B3LYP/6-31G(d,p) level of theory. The aromaticity<sup>5</sup> and olefinicity<sup>6</sup> values for the ground, excited and triplet states were calculated according to previous publications and described in the subsequent section. The Nucleus-Independent Chemical Shifts (NICS, given in ppm) were calculated by a method described elsewhere<sup>7</sup>.

## Fluorescent dye – antibody conjugates

**Table S1.** A collection of fluorescent antibody conjugates with different fluorescent dyes

| Reference                                              | mAb         | Dye              | Conjugation method                     | $\lambda_{exc}$ [nm] | $\lambda_{em}$ [nm] |
|--------------------------------------------------------|-------------|------------------|----------------------------------------|----------------------|---------------------|
| <i>Clin Cancer Res</i> <b>2007</b> , 13(10), 2936-2945 | Trastuzumab | BODIPY-FL        | Free amino-group coupling by acid      | 500                  | 509                 |
| <i>Clin Cancer Res</i> <b>2007</b> , 13(10), 2936-2945 | Trastuzumab | Oregon Green 488 | Free amino-group coupling by NHS ester | 496                  | 524                 |
| <i>EJSO</i> <b>2010</b> , 36, 6-15                     | Cetuximab   | Oregon Green 488 | Free amino-group coupling by NHS ester | 496                  | 524                 |
| <i>Clin Cancer Res</i> <b>2007</b> , 13(10), 2936-2945 | Trastuzumab | FITC             | Free amino-group coupling by ITC       | 495                  | 525                 |
| <i>Clin Cancer Res</i> <b>2007</b> , 13(10), 2936-2945 | Trastuzumab | Rhodamine 6G     | Free amino-group coupling by NHS ester | 525                  | 548                 |
| <i>Chem Comm</i> <b>2021</b> , 57, 9760-9763           | Rituximab   | Cy3              | Click reaction on modified Tyr         | 554                  | 568                 |
| <i>Chem Comm</i> <b>2021</b> , 57, 9760-9763           | Rituximab   | TAMRA            | Click reaction on modified Tyr         | 552                  | 578                 |
| <i>Chem Comm</i> <b>2021</b> , 57, 9760-9763           | Rituximab   | ATTO590          | Click reaction on modified Tyr         | 592                  | 622                 |
| <i>Eur J Med Chem</i> <b>2023</b> , 252, 115298        | Trastuzumab | Cy5              | Free amino-group coupling by NHS ester | 649                  | 667                 |
| Breast Cancer Res. 2012, 14, R61                       | Panitumumab | Alexa680         | Free amino-group coupling by NHS ester | 684                  | 702                 |
| <i>Eur Radiol</i> <b>2004</b> , 14, 1124–1129          | Trastuzumab | Cy5.5            | Free amino-group coupling by NHS ester | 683                  | 703                 |
| <i>Mol Imaging</i> <b>2021</b> , Article ID 5540569    | Trastuzumab | IRDye800         | Free amino-group coupling by NHS ester | 775                  | 792                 |
| <i>Chin J Cancer Res</i> <b>2016</b> , 28(3):362-369   | Trastuzumab | IRDye800         | Free amino-group coupling by NHS ester | 775                  | 792                 |
| <i>J. Nucl. Med.</i> <b>2007</b> , 48(9), 1501-1510    | Trastuzumab | IRDye800         | Free amino-group coupling by NHS ester | 775                  | 792                 |
| Breast Cancer Res. 2012, 14, R61                       | Trastuzumab | ICG              | Free amino-group coupling by NHS ester | 789                  | 814                 |

## Synthesis of cyanine with azide functional group

*Synthesis of thiazole 2.*

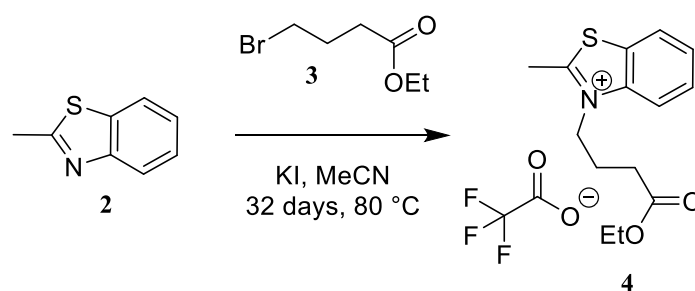

Scheme S1. The synthesis of thiazole 4.

2-Methylbenzothiazole (**2**) (1.7 mL, 2.0 g, 13 mmol, 1.0 equiv.), ethyl 4-bromobutyrate (**3**) (2.3 mL, 3.1 g, 16 mmol, 1.3 equiv.) and potassium-iodide (1.1 g, 7.0 mmol, 0.5 equiv.) were dissolved in acetonitrile (8 mL), and the white, opaque mixture was stirred for 32 days at 80 °C. The reaction was monitored with HPLC-MS. After 11 days additional ethyl 4-bromobutyrate (**3**) (1. mL, 7.0 mmol, 0.5 equiv.) was added. The white precipitate was filtered off then the residual brown solution was evaporated, resulting 4.7 g of crude product (brown solid). 0.9 g of the crude product was purified by preparative HPLC (0.2% TFA in water–acetonitrile, using the gradient method). After purification, the pure product was lyophilized, resulting 0.528 g of 3-(4-ethoxy-4-oxobutyl)-2-methylbenzo[d]thiazol-3-ium TFA salt (**4**, yield: 78% (calc. for the portion), HPLC purity: 96%) as a brown oil.

#### *Spectroscopic data of 4*

<sup>1</sup>H NMR (400 MHz, DMSO-*d*6)  $\delta$  = 8.44 (dd, *J* = 8.2, 1.2 Hz, 1H, H<sub>10</sub>), 8.37 (d, *J* = 8.5 Hz, 1H, H<sub>7</sub>), 7.91 (ddd, *J* = 8.5, 7.2, 1.3 Hz, 1H, H<sub>8</sub>), 7.85 – 7.76 (m, 1H, H<sub>9</sub>), 4.77 – 4.68 (m, 2H, H<sub>11</sub>), 4.04 (q, *J* = 7.1 Hz, 2H, H<sub>18</sub>), 3.21 (s, 3H, H<sub>1</sub>), 2.60 (t, *J* = 7.1 Hz, 2H, H<sub>13</sub>), 2.10 (tq, *J* = 7.4, 5.1, 3.2 Hz, 2H, H<sub>12</sub>), 1.16 (t, *J* = 7.1 Hz, 3H, H<sub>17</sub>). <sup>13</sup>C NMR (101 MHz, DMSO-*d*6)  $\delta$  = 177.6, 172.3, 140.9, 129.5, 129.2, 128.1, 124.7, 116.7, 60.2, 48.27, 30.1, 22.9, 16.8, 14.1.

HRMS (ESI/Q-TOF) *m/z*: [M]<sup>+</sup> Calc. for C<sub>14</sub>H<sub>18</sub>NO<sub>2</sub>S<sup>+</sup> 264.1053; found 264.1048.

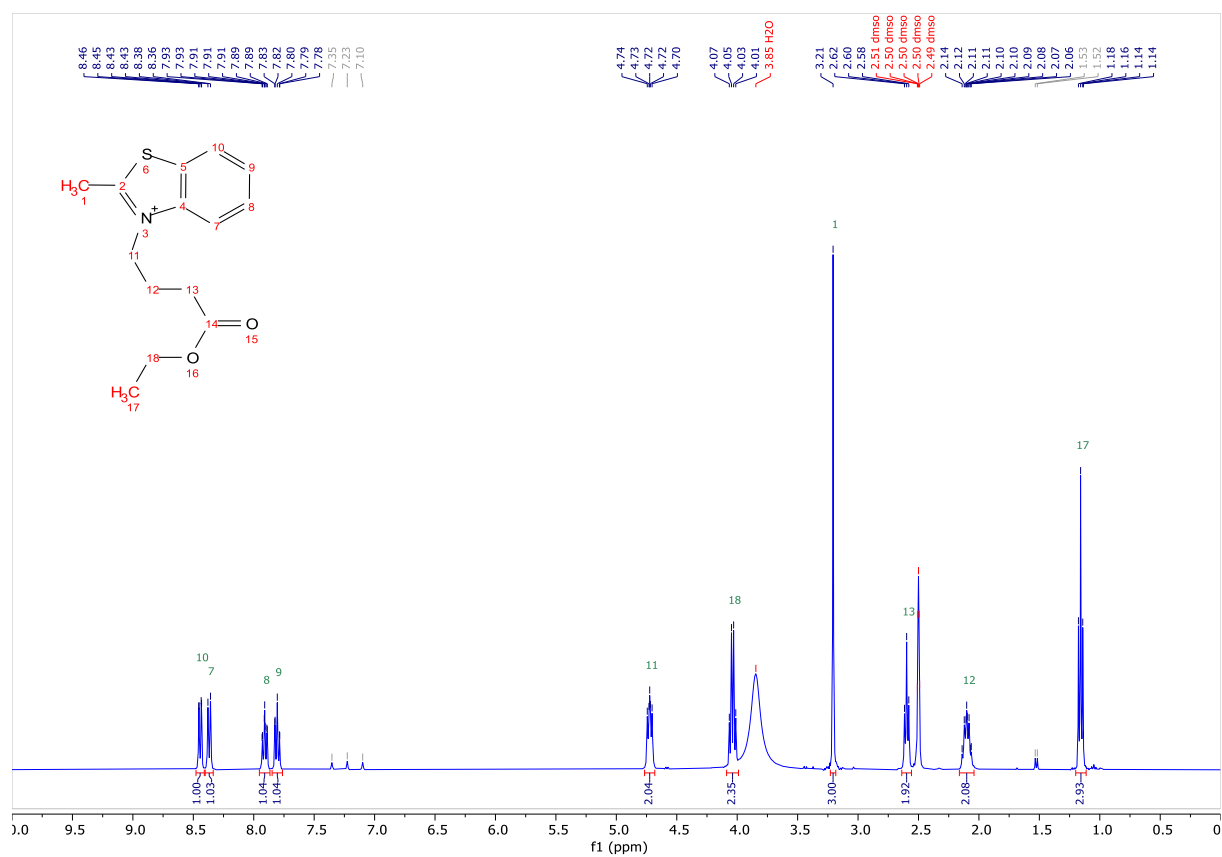

**Figure S1.**  $^1\text{H}$  NMR spectrum of **4** recorded at 400 MHz in  $\text{DMSO-}d_6$ .

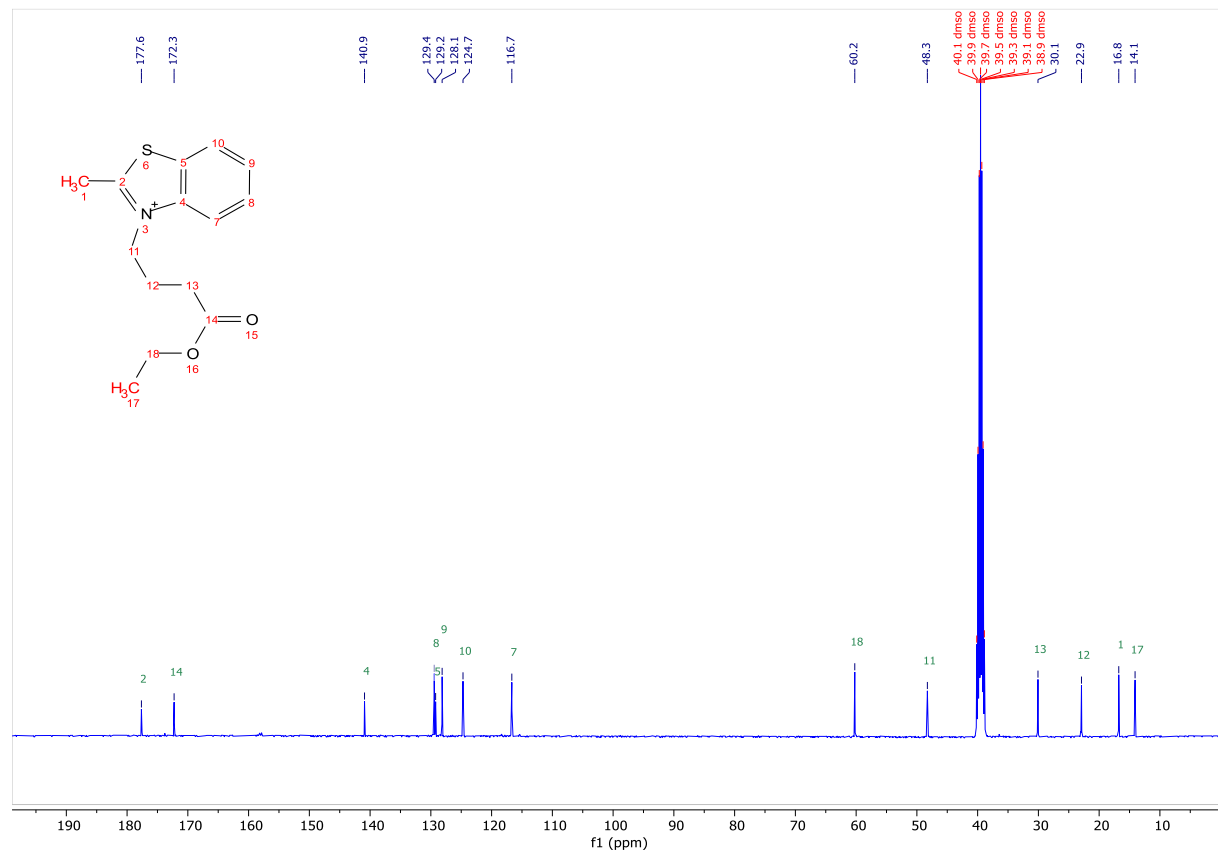

**Figure S2.**  $^{13}\text{C}$  NMR spectrum of **4** recorded at 101 MHz in  $\text{DMSO-}d_6$ .

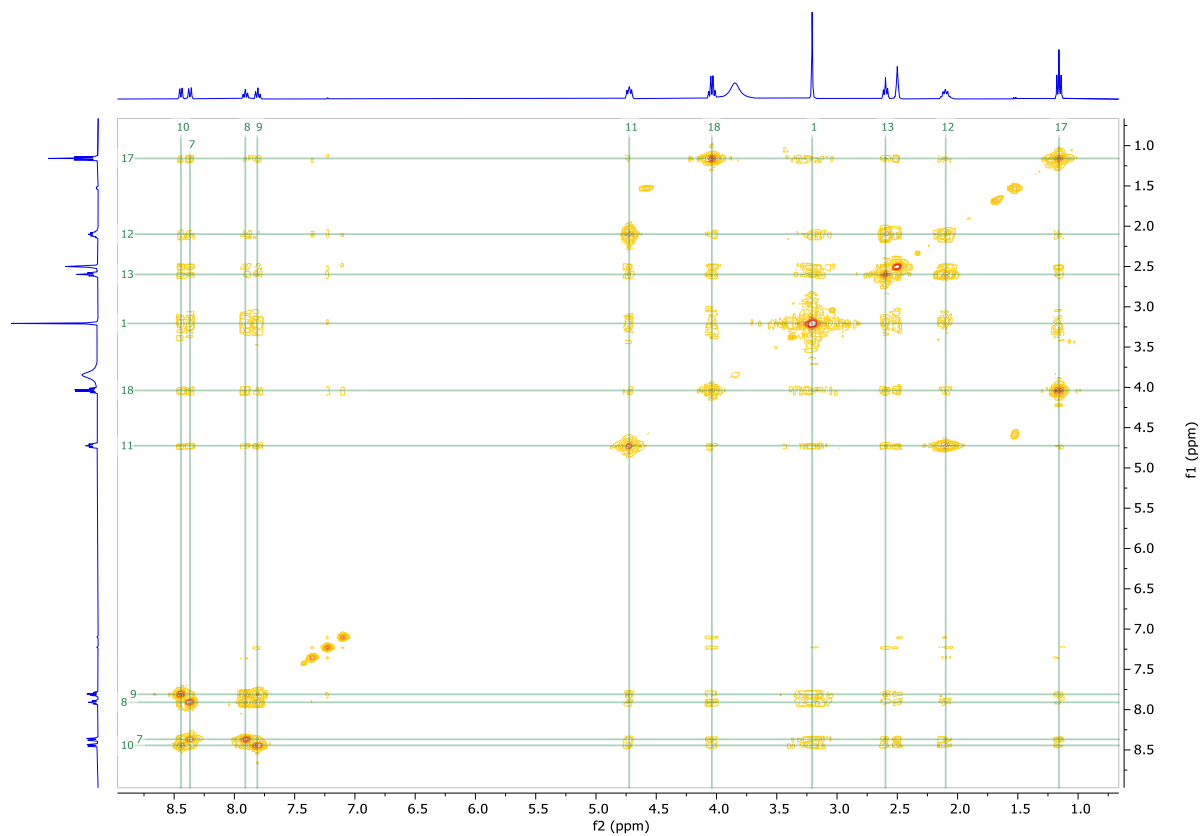

**Figure S3.** COSY spectrum of **4** recorded at 400 MHz in DMSO-*d*<sub>6</sub>.

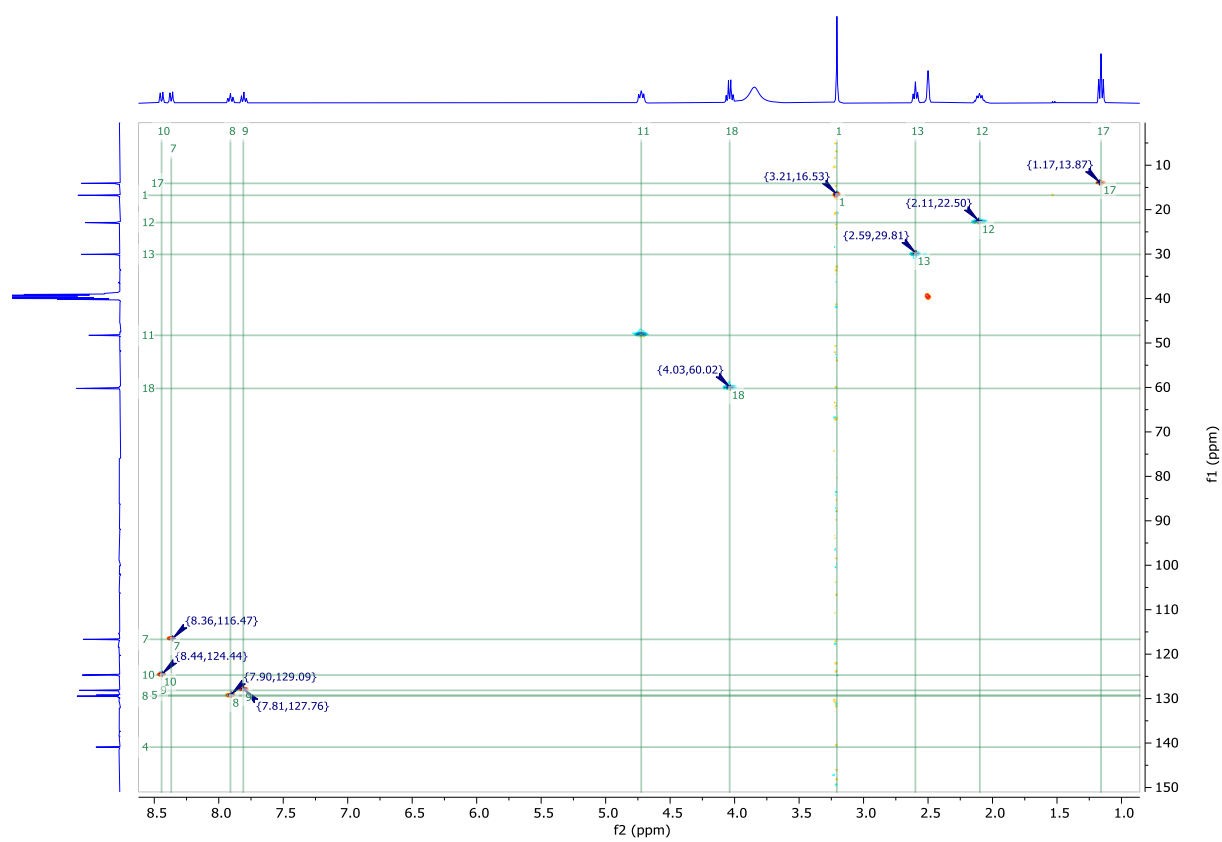

**Figure S4.** HSQC spectrum of **4** recorded at 400 MHz and 101 MHz in DMSO-*d*<sub>6</sub>.

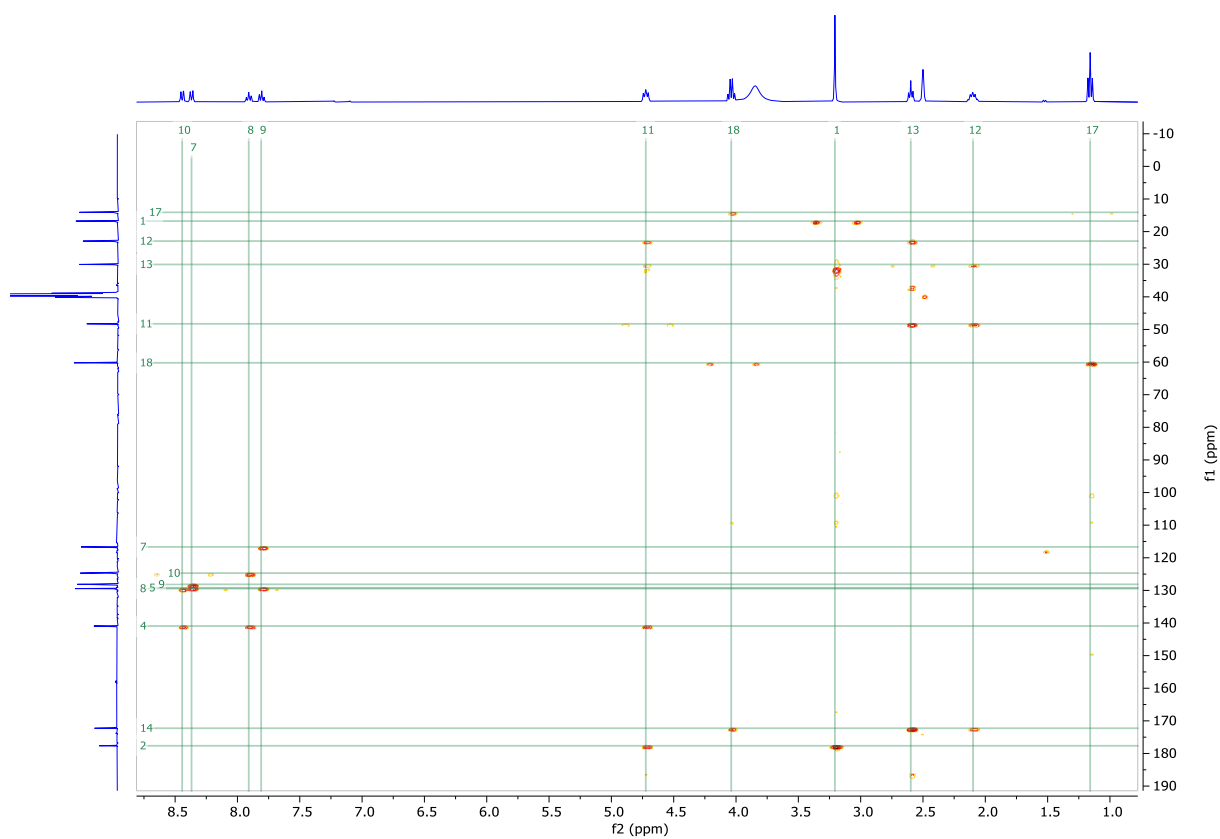

**Figure S5.** HMBC spectrum of **4** recorded at 400 MHz and 101 MHz in DMSO-*d*<sub>6</sub>.

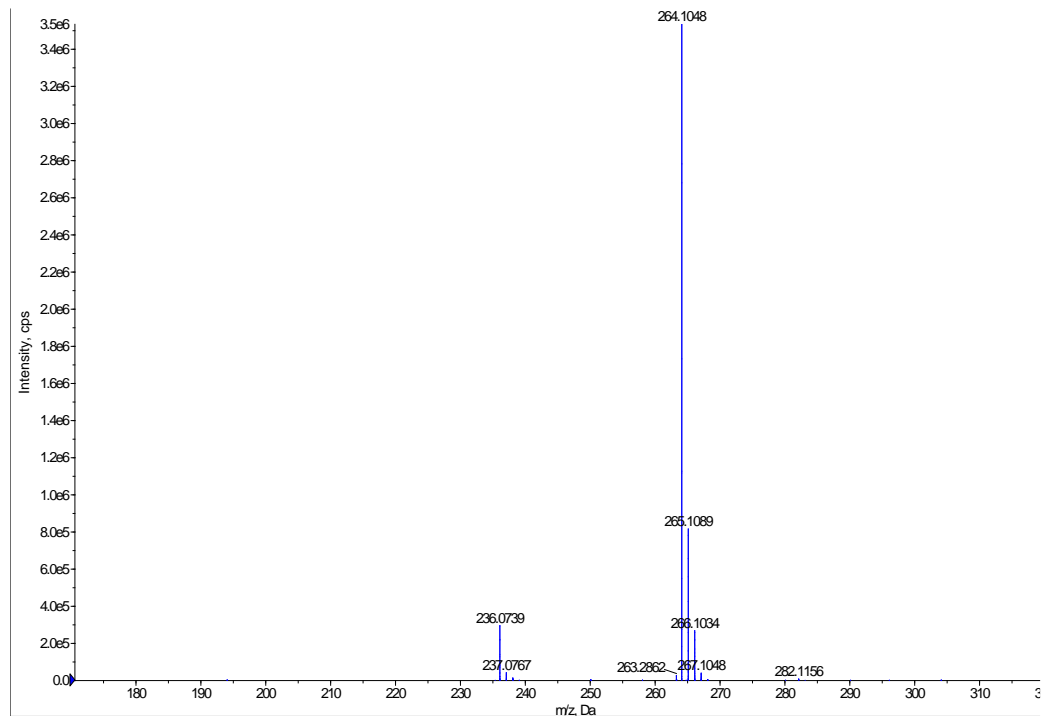

**Figure S6.** HRMS spectrum of **4**.



### Synthesis of cyanine ester **7**.

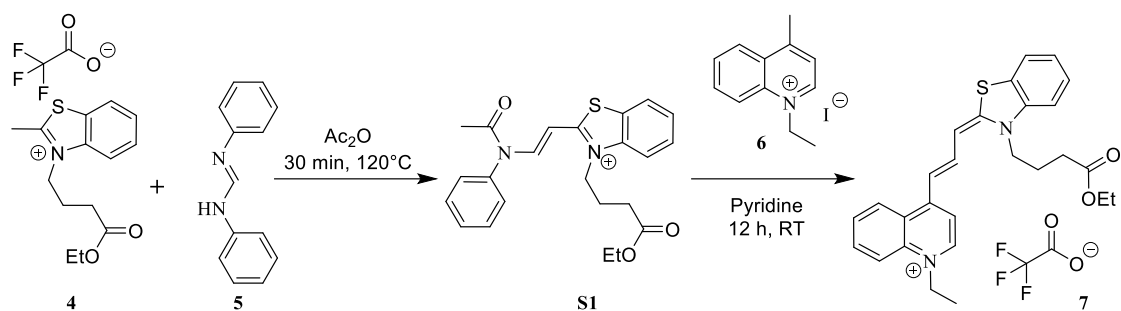

Scheme S2. The synthesis of cyanine ester **7**.

A solution of indolium salt (**4**, 240 mg, 0.69 mmol, 1.0 equiv.) and *N,N*-diphenylformamidinium salt (**5**, 164 mg, 0.83 mmol, 1.2 equiv.) in acetic anhydride (3 mL) was heated in an oil bath at  $120^\circ\text{C}$  for 30 minutes. The pink solution turned to brown after 30 minutes. After the indolium salt was converted to the intermediate **S1** (monitored with HPLC-MS) the reaction mixture was cooled to room temperature. 1-ethyl-4-methylquinolin-1-ium iodide (**6**, 292 mg; 0.97 mmol, 1.4 equiv.) in dry pyridine (2 mL) was added. The solution turned deep red. The mixture was stirred at room temperature for 12 hours. The mixture was cooled down using an icy water bath, and 2 mL MeOH was added to the reaction mixture to quench the acetic anhydride. The solvent was removed under reduced pressure. The crude product was purified by preparative HPLC (0.2% TFA in water–acetonitrile, using the gradient elution). After purification, the pure product was lyophilized, resulting 80 mg TFA salt of the cyanine ester (**7**, yield: 16%, HPLC purity: 76%) as a blue powder.

### Spectroscopic data of **7**

$^1\text{H}$  NMR (600 MHz,  $\text{DMSO-}d_6$ )  $\delta$  = 8.46 – 8.41 (m, 2H,  $\text{H}_{22}$ ,  $\text{H}_{23}$ ), 8.12 (t,  $J$  = 12.8 Hz, 1H,  $\text{H}_{16}$ ), 8.08 (d,  $J$  = 8.7 Hz, 1H,  $\text{H}_{27}$ ), 7.95 (ddd,  $J$  = 8.6, 6.9, 1.3 Hz, 1H,  $\text{H}_{26}$ ), 7.84 (ddd,  $J$  = 10.2, 7.1, 3.3 Hz, 2H,  $\text{H}_7$ ,  $\text{H}_{10}$ ), 7.70 (ddd,  $J$  = 8.2, 6.9, 1.0 Hz, 1H,  $\text{H}_{25}$ ), 7.57 (d,  $J$  = 8.2 Hz, 1H,  $\text{H}_{24}$ ), 7.46 (ddd,  $J$  = 8.4, 7.3, 1.3 Hz, 1H,  $\text{H}_8$ ), 7.31 – 7.25 (m, 1H,  $\text{H}_9$ ), 7.05 (d,  $J$  = 13.3 Hz, 1H,  $\text{H}_{17}$ ), 6.51 (d,  $J$  = 12.2 Hz, 1H,  $\text{H}_1$ ), 4.59 (q,  $J$  = 7.1 Hz, 2H,  $\text{H}_{28}$ ), 4.24 (t,  $J$  = 7.7 Hz, 2H,  $\text{H}_{11}$ ), 4.06 (q,  $J$  = 7.1 Hz, 2H,  $\text{H}_{32}$ ), 2.54 (t,  $J$  = 7.2 Hz, 2H,  $\text{H}_{13}$ ), 1.98 (p,  $J$  = 7.3 Hz, 2H,  $\text{H}_{12}$ ), 1.45 (t,  $J$  = 7.2 Hz, 3H,  $\text{H}_{29}$ ), 1.17 (t,  $J$  = 7.1 Hz, 3H,  $\text{H}_{31}$ ).  $^{13}\text{C}$  NMR (151 MHz,  $\text{DMSO-}d_6$ )  $\delta$  = 172.3, 160.9, 150.4, 143.8, 142.3, 141.4, 137.7, 133.5, 127.6, 126.7, 125.2, 124.7, 124.3, 124.1, 122.6, 117.8, 112.2, 110.0, 109.4, 98.3, 60.1, 49.4, 44.7, 30.3, 22.1, 14.7, 14.1.

HRMS (ESI/Q-TOF)  $m/z$ :  $[\text{M}]^+$  Calc. for  $\text{C}_{27}\text{H}_{29}\text{N}_2\text{O}_2\text{S}^+$  445.1949; found 445.1954.

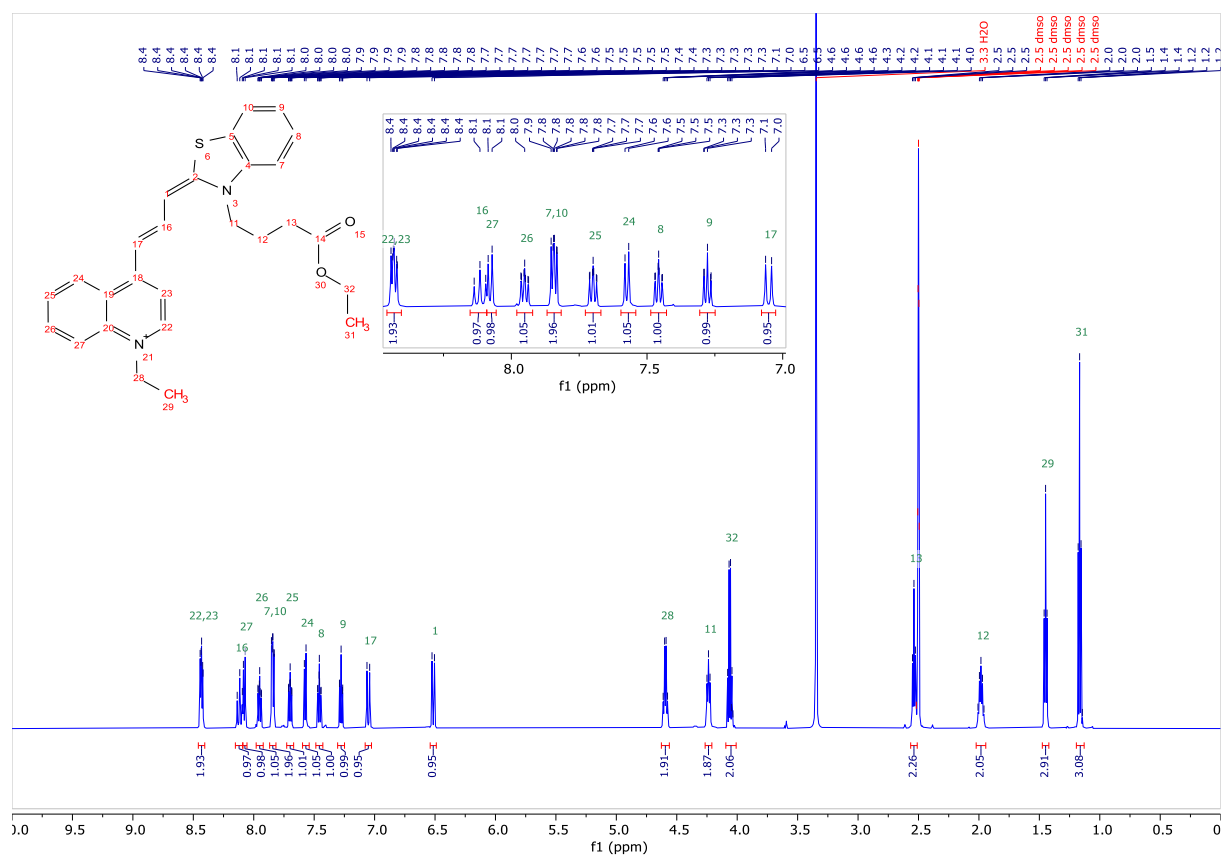

**Figure S7.**  $^1\text{H}$  NMR spectrum of **7** recorded at 600 MHz in  $\text{DMSO-}d_6$ .

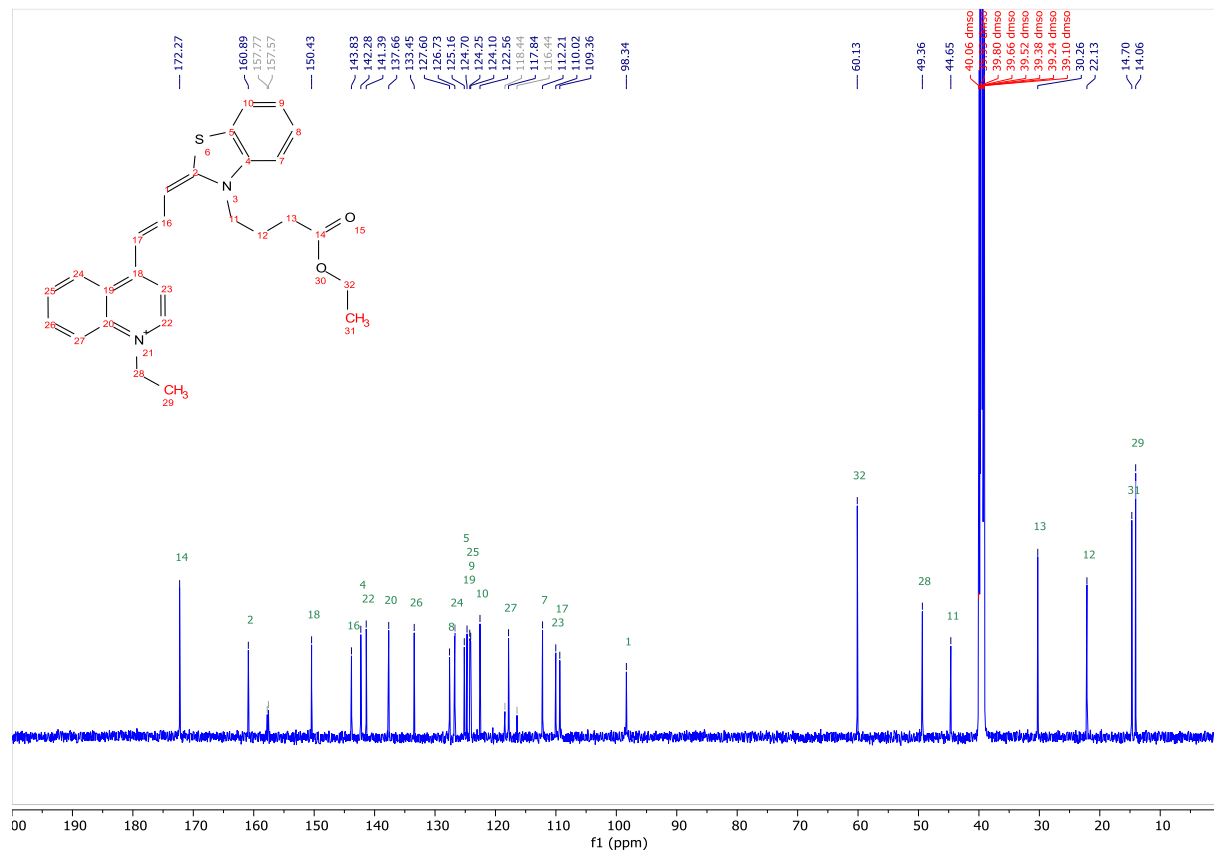

**Figure S8.**  $^{13}\text{C}$  NMR spectrum of **7** recorded at 151 MHz in  $\text{DMSO-}d_6$ .

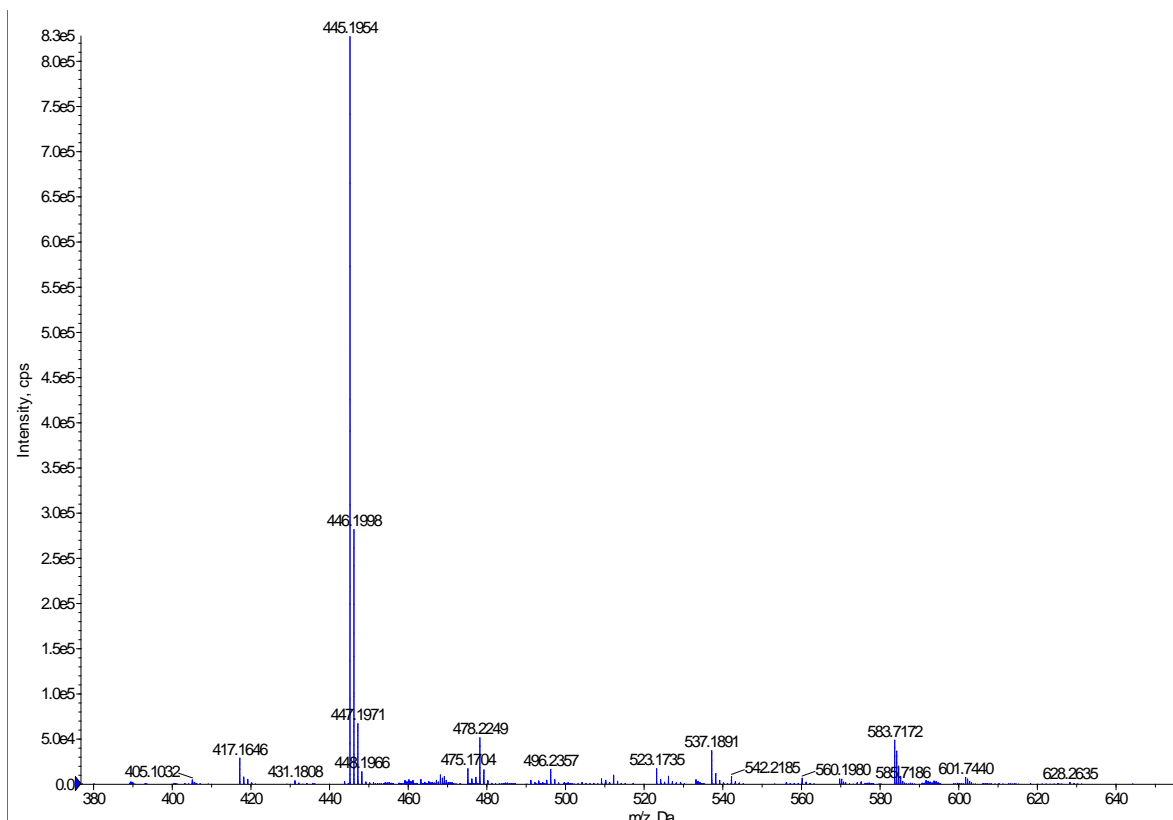

**Figure S9.** HRMS spectrum of **7**.

*Synthesis of cyanine carboxylic acid 1.*

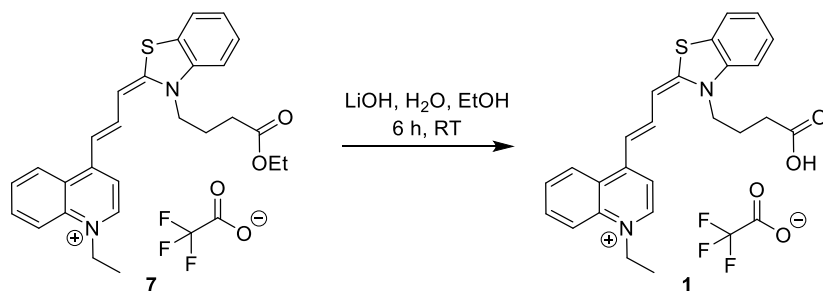

**Scheme S3.** The synthesis of cyanine carboxylic acid **1**.

The TFA salt of cyanine ester **6** (62 mg, 0.11 mmol, 1.0 equiv.) was dissolved in EtOH (1 mL). LiOH (5 mg, 0.22 mmol, 2.0 equiv.) dissolved in a drop of water was added. The solution was stirred at room temperature. After 2 hours, 4 mg LiOH (0.18 mmol, 1.6 equiv.) was added and stirred for an additional 2 hours, then 10 mg LiOH (0.44 mmol, 4.0 equiv.) was added to the mixture and stirred for an additional 2 hours. The solution was neutralized with 4 droplets of 1 M HCl solution, then the solvent was removed under reduced pressure. The crude product was purified by preparative HPLC (0.2% TFA in water–acetonitrile, using gradient elution).

After purification, the pure product was lyophilized, resulting in 40 mg of the cyanine carboxylic acid TFA salt **1** (yield: 85%, HPLC purity: 98%) as a blue powder.

HRMS (ESI/Q-TOF)  $m/z$ :  $[M]^+$  Calc. for  $C_{25}H_{25}N_2O_2S^+$  417.1636; found 417.1651.

### Spectroscopic data of **1**

$^1H$  NMR (600 MHz, DMSO- $d_6$ )  $\delta$  = 8.46 (dd,  $J$  = 7.4, 2.9 Hz, 2H, H<sub>23</sub>, H<sub>24</sub>), 8.16 (t,  $J$  = 12.8 Hz, 1H, H<sub>17</sub>), 8.10 (d,  $J$  = 8.8 Hz, 1H, H<sub>28</sub>), 7.97 (ddd,  $J$  = 8.6, 6.8, 1.4 Hz, 1H, H<sub>27</sub>), 7.89 (dd,  $J$  = 7.5, 5.6 Hz, 2H, H<sub>7</sub>, H<sub>10</sub>), 7.72 (t,  $J$  = 7.7 Hz, 1H, H<sub>26</sub>), 7.62 (d,  $J$  = 8.2 Hz, 1H, H<sub>25</sub>), 7.53 – 7.47 (m, 1H, H<sub>8</sub>), 7.31 (t,  $J$  = 7.6 Hz, 1H, H<sub>9</sub>), 7.08 (d,  $J$  = 13.3 Hz, 1H, H<sub>18</sub>), 6.56 (d,  $J$  = 12.2 Hz, 1H, H<sub>1</sub>), 4.61 (q,  $J$  = 7.2 Hz, 2H, H<sub>29</sub>), 4.25 (t,  $J$  = 7.8 Hz, 2H, H<sub>11</sub>), 2.47 (t,  $J$  = 7.2 Hz, 2H, H<sub>13</sub>), 1.95 (p,  $J$  = 7.3 Hz, 2H, H<sub>12</sub>), 1.45 (t,  $J$  = 7.2 Hz, 3H, H<sub>30</sub>).  $^{13}C$  NMR (151 MHz, DMSO- $d_6$ )  $\delta$  = 173.8, 160.9, 150.5, 144.0, 142.3, 141.4, 137.7, 133.5, 127.7, 126.8, 125.2, 124.8, 124.3, 124.2, 122.7, 117.8, 112.3, 110.1, 109.4, 98.6, 49.4, 44.8, 30.3, 22.2, 14.7.

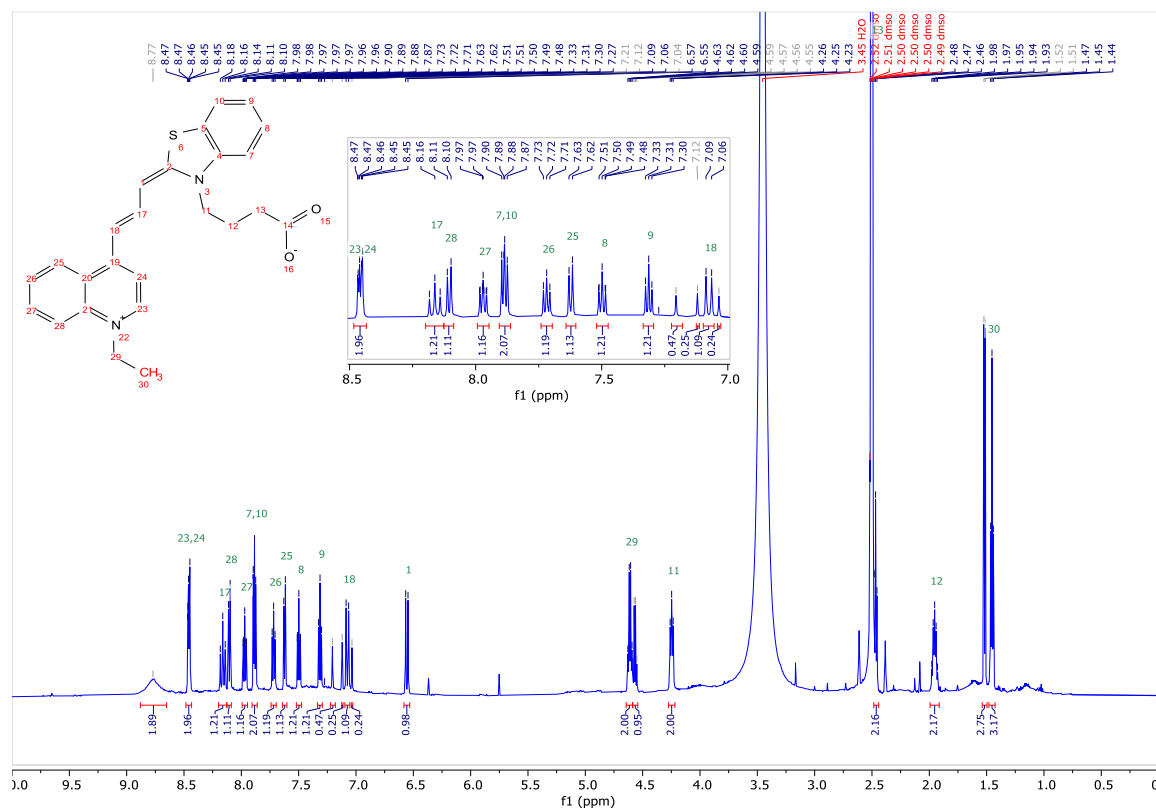

**Figure S10.**  $^1H$  NMR spectrum of **1** recorded at 600 MHz in DMSO- $d_6$ .

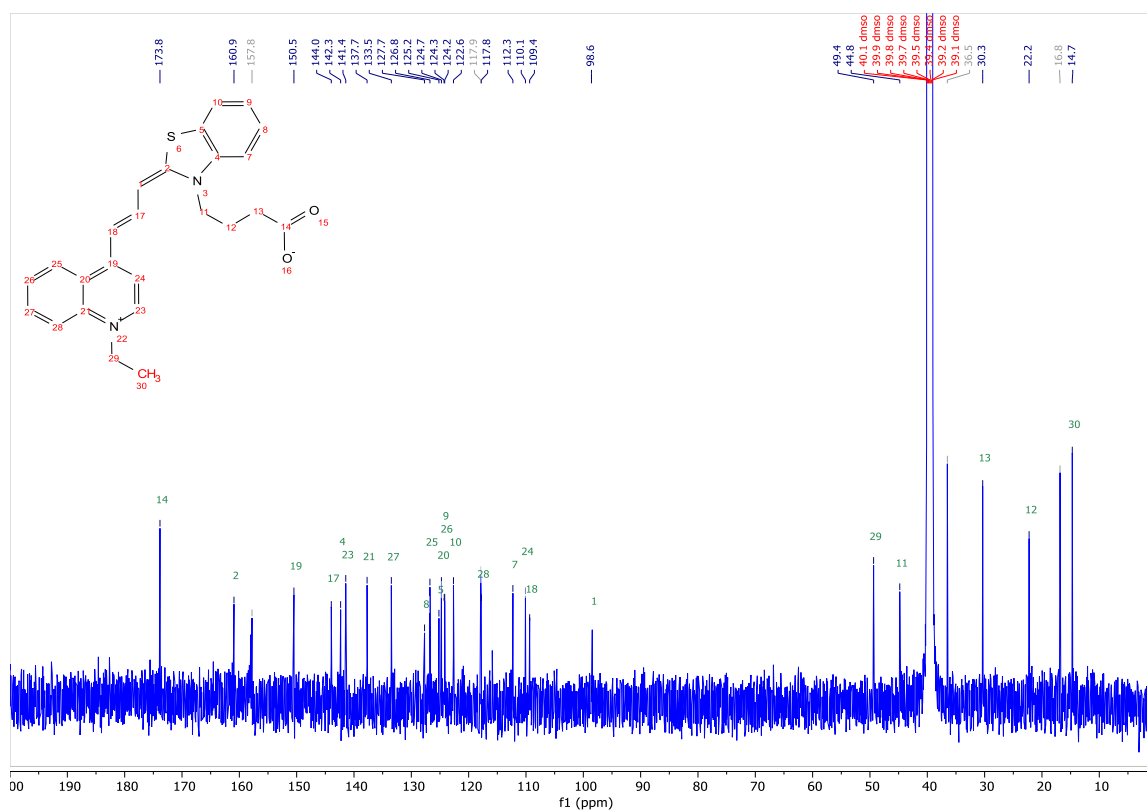

**Figure S11.**  $^{13}\text{C}$  NMR spectrum of **1** recorded at 151 MHz in  $\text{DMSO-}d_6$ .

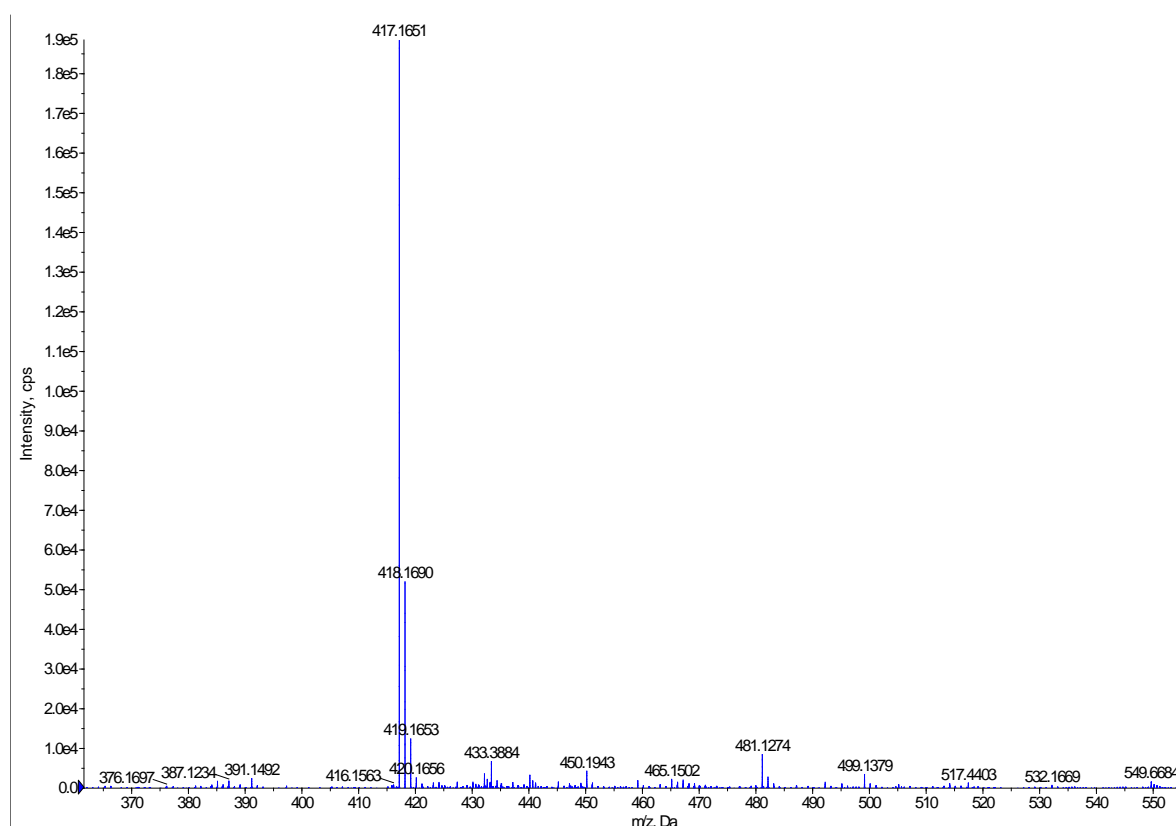

**Figure S12.** HRMS spectrum of **1**.

### Synthesis of cyanine dye with azide function (**9**)

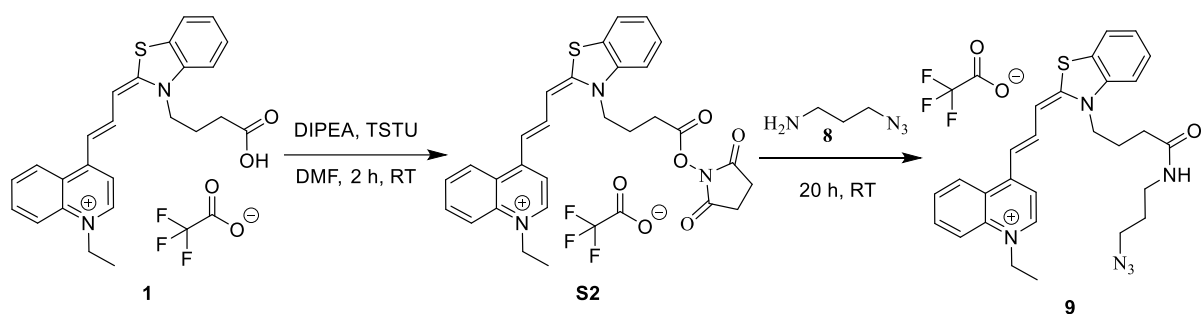

Scheme S4. The synthesis of cyanine dye with azide group (**9**)

The cyanine carboxylic acid TFA salt (**1**, 50 mg, 0.09 mmol, 1.0 equiv.) was dissolved in 1 mL dry DMF, then 0.31 ml DIPEA (233 mg, 1.8 mmol, 19 equiv.) was added to the solution. After cooling the mixture to 0 °C, a solution of 54 mg N,N,N',N'-tetramethyl-O-(N-succinimidyl)uronium tetrafluoroborate, (TSTU, 0.18 mmol, 1.9 equiv.) in 1 mL of DMS was added, then the mixture was stirred for 2 hours at room temperature. The reaction was monitored with HPLC-MS, and after total conversion, 3-azidopropylamine (**8**, 120 mg, 1.2 mmol, 12.8 equiv.) was added to the mixture, and stirred at room temperature overnight. Due to the low conversion, additional 3-azidopropylamine (**8**) (120 mg, 1.2 mmol, 12.8 equiv.) was added to the solution, and after 30 minutes the solvent was evaporated under reduced pressure, resulting in a dark blue solid. The crude product was purified by preparative HPLC (0.2% TFA in water–acetonitrile, using the gradient elution). After purification, the pure product was lyophilized, resulting 23 mg of cyanine dye azide TFA salt **9** (yield: 40%, HPLC purity: >95%).

### Spectroscopic data of **9**

$^1\text{H}$  NMR (400 MHz, Methanol- $d_4$ )  $\delta$  = 8.54 (s, 1H), 8.50 (d,  $J$  = 8.5 Hz, 1H), 8.21 (d,  $J$  = 7.0 Hz, 1H), 8.19 (t,  $J$  = 12.8 Hz, 1H), 8.00 (d,  $J$  = 8.7 Hz, 1H), 7.98 – 7.89 (m, 1H), 7.71 – 7.64 (m, 3H), 7.50 – 7.43 (m, 2H), 7.28 (ddd,  $J$  = 8.2, 6.6, 1.6 Hz, 1H), 7.08 (d,  $J$  = 13.4 Hz, 1H), 6.50 (d,  $J$  = 12.3 Hz, 1H), 4.57 (q,  $J$  = 7.2 Hz, 2H), 4.27 (t,  $J$  = 7.8 Hz, 2H), 3.36 (t,  $J$  = 6.7 Hz, 2H), 3.30 (t,  $J$  = 7.0 Hz, 2H), 2.43 (t,  $J$  = 6.7 Hz, 2H), 2.12 (p,  $J$  = 6.8 Hz, 2H), 1.77 (p,  $J$  = 6.8 Hz, 2H), 1.56 (t,  $J$  = 7.2 Hz, 3H).  $^{13}\text{C}$  NMR (101 MHz, Methanol- $d_4$ )  $\delta$  = 173.4, 162.3, 152.0, 144.3, 141.9, 141.7, 138.4, 133.6, 127.8, 126.8, 125.6, 125.4, 125.1, 124.4, 122.3, 117.4, 112.2, 109.6, 109.4, 98.4, 49.9, 49.0, 45.2, 36.8, 31.5, 28.6, 22.7, 13.9.

HRMS (ESI/Q-TOF)  $m/z$ :  $[\text{M}]^+$  Calc. for  $\text{C}_{28}\text{H}_{31}\text{N}_6\text{OS}^+$  499.2275; found 499.2278

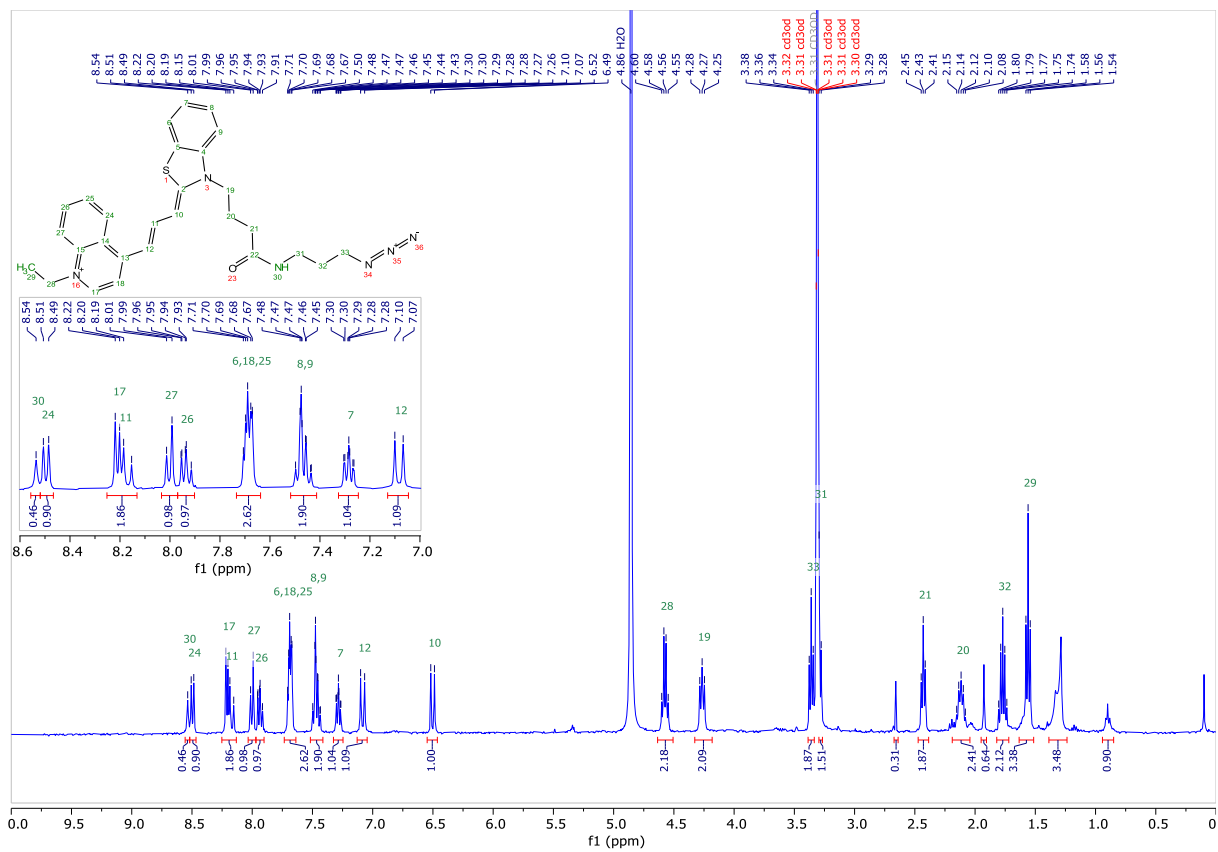

**Figure S13.**  $^1\text{H}$  NMR spectrum of **9** recorded at 400 MHz in methanol- $d_4$ .

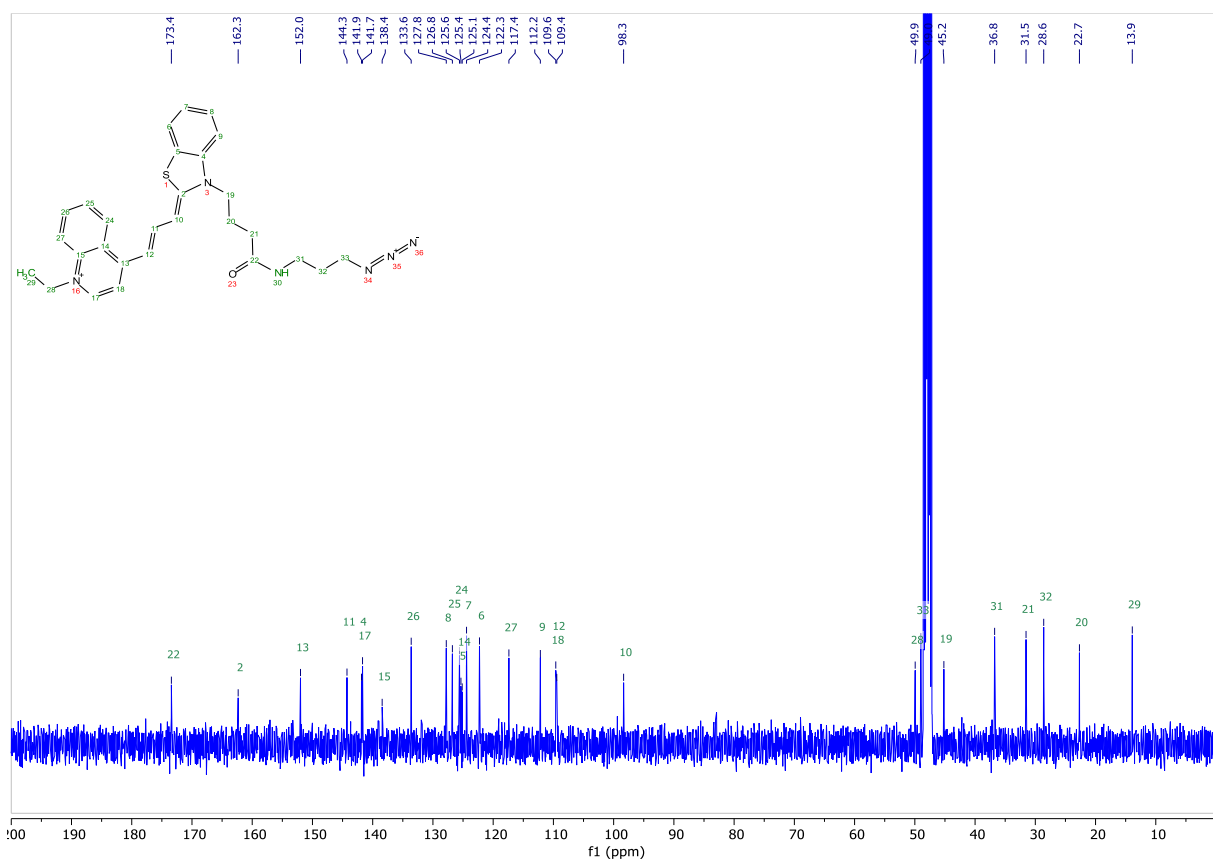

**Figure S14.**  $^{13}\text{C}$  NMR spectrum of **9** recorded at 101 MHz in methanol- $d_4$ .

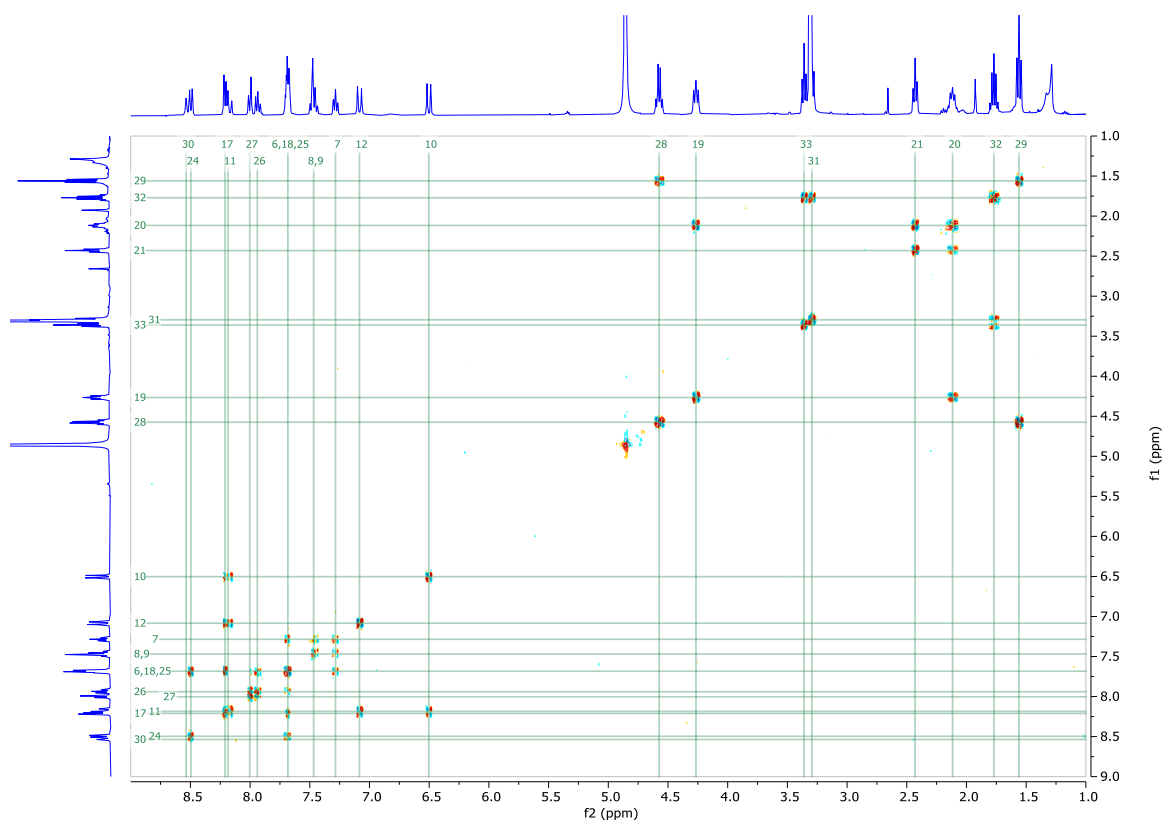

**Figure S15.** COSY spectrum of **9** recorded at 400 MHz in methanol- $d_4$ .

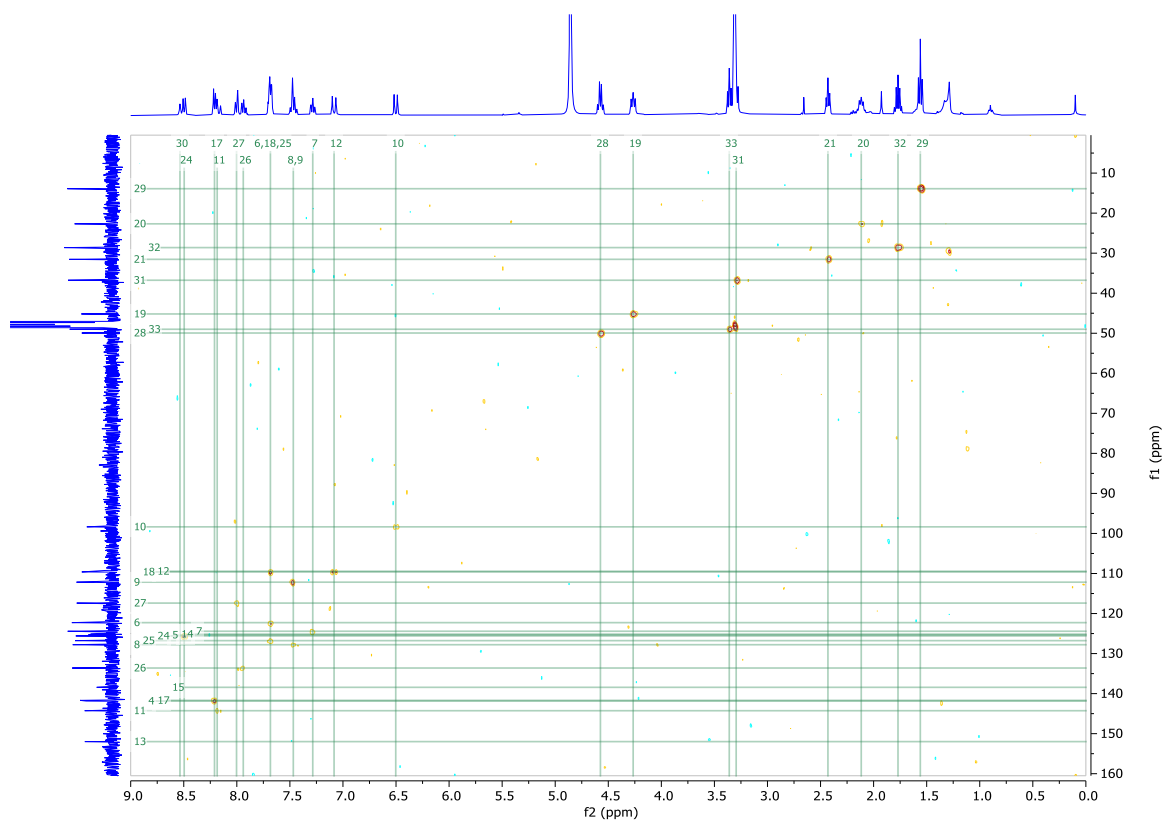

**Figure S16.** HSQC spectrum of **9** recorded at 400 MHz and 101 MHz in methanol- $d_4$ .



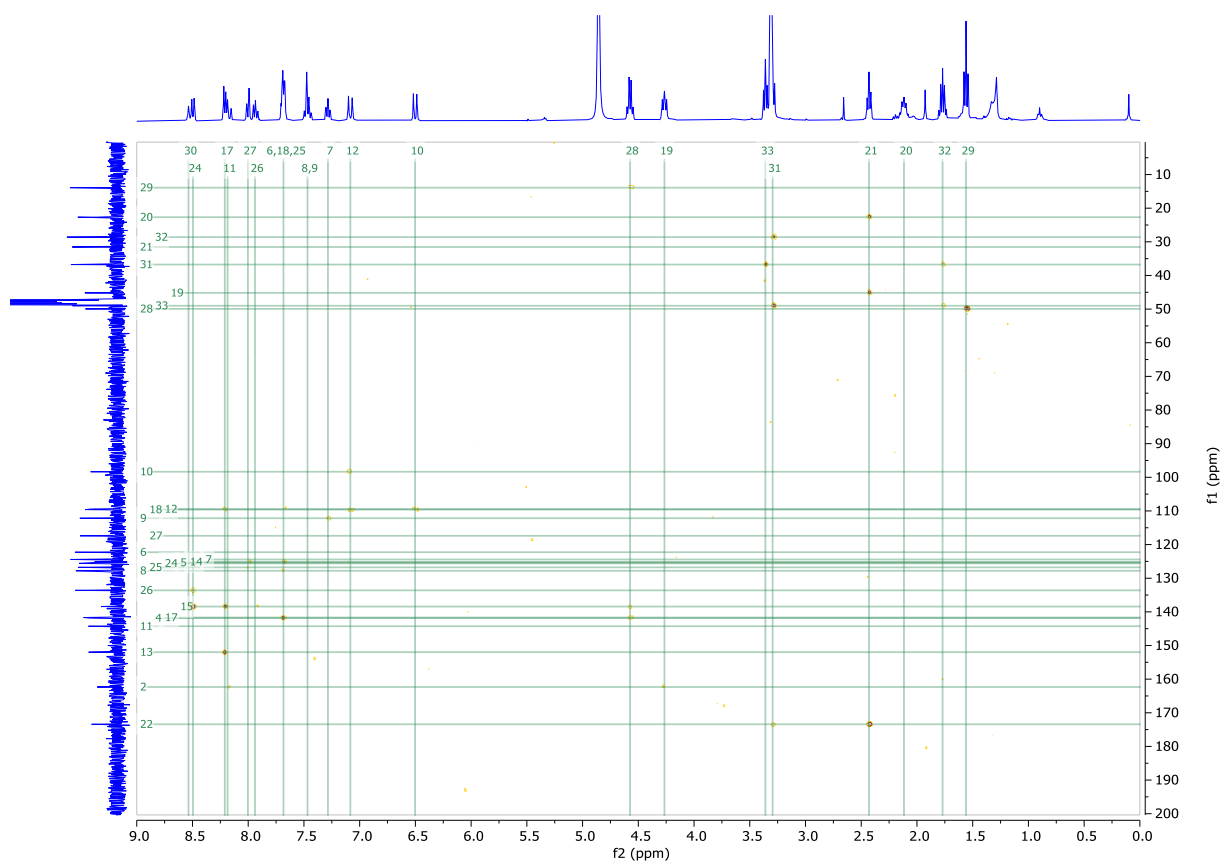

**Figure S17.** HMBC spectrum of **9** recorded at 400 MHz and 101 MHz in methanol- $d_4$ .

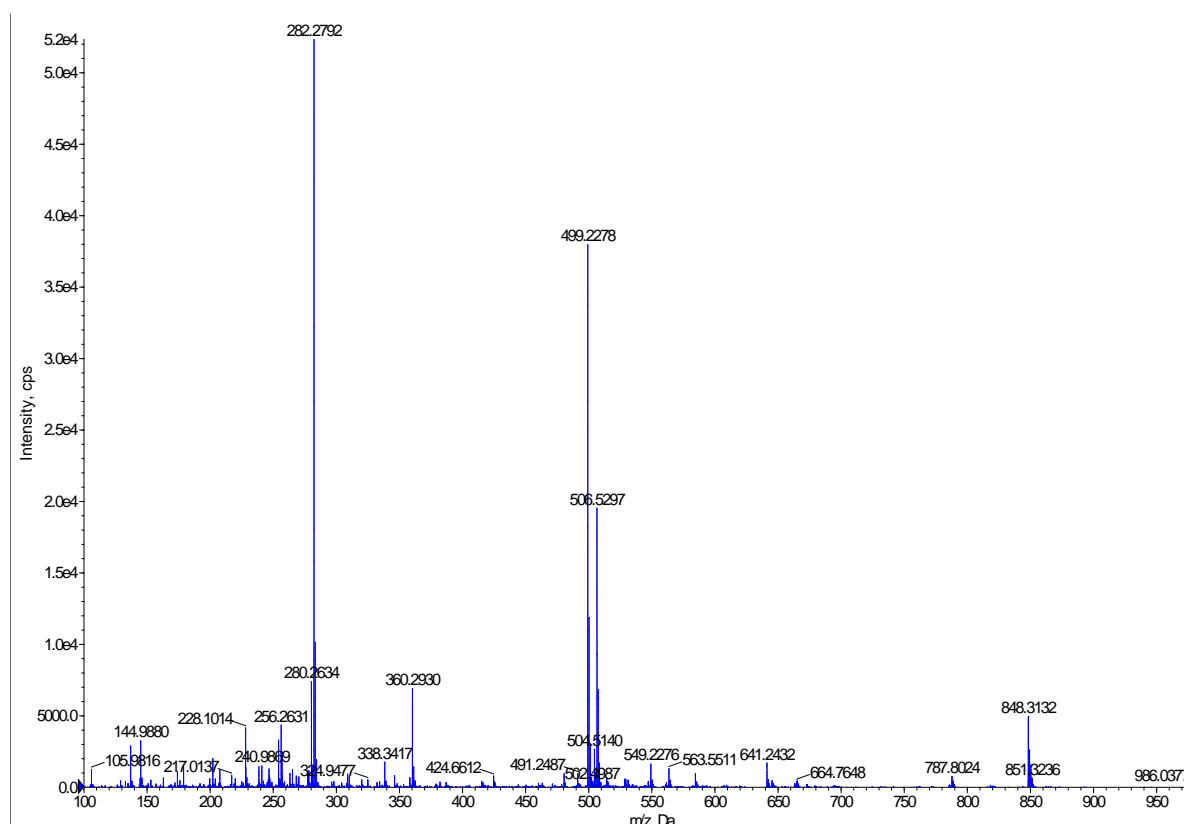

**Figure S18.** HRMS spectrum of **9**.

## SDS-PAGE and densitometry

Non-reducing glycine-SDS-PAGE at 10% acrylamide was performed following standard lab procedures. A 4% stacking gel was used and a broad-range MW marker (4.6–300 kDa, ProSieve QuadColor Protein Marker, Lonza) was co-run to estimate protein weights. Samples (10  $\mu$ L at 5  $\mu$ M) were mixed with loading buffer (3  $\mu$ L, composition for 6 $\times$ SDS: 1 g SDS, 3 mL glycerol, 6 mL 0.5 M Tris buffer pH = 6.8; 2 mg Coomassie Blue R250 in 10 mL), and heated at 65  $^{\circ}$ C for 5 minutes. Samples were subsequently loaded into the wells at a volume of 13  $\mu$ L. All gels were run at constant 200 mA for 45 minutes. Gels were stained using a Coomassie stain (0.12 g Coomassie Blue G-250, 0.10 g Coomassie Blue R-250, 500 mL MeOH, 400 mL distilled water, 100 mL acetic acid), after washing it was rested at room temperature for 16 h in a water-ethanol mixture. Then the gels were imaged using a HP DeskjetJ1350? scanner at 600 dpi. Images were saved under default brightness, contrast, and gamma settings. Densitometry was performed using ImageJ<sup>8</sup>. Background subtraction was achieved using the built-in plugin with a rolling ball radius of 30 $^{\circ}$ , sliding paraboloid, and smoothing. Brightness and contrast settings were auto-adjusted within the software.

## Photophysical measurements

Absorbance measurements were carried out on a Jasco V-750 Spectrophotometer (in a quartz standard cell cuvette with a 1 cm path length, 1 nm bandwidth, 400 nm/min recording speed) operating at 21  $^{\circ}$ C. The absorbance spectra was measured from 220 nm to 750 nm. The UV/Vis absorbance measurements of the trastuzumab conjugate were carried out on SpectraMax iD5 Multi-Mode Microplate Reader (Molecular Devices; San Jose, CA). Before the measurements were taken, buffer exchange was performed six times on each sample with Sartorius Vivaspin 500 10000 MWCO at 15000 g for 10 minutes. Sample buffer was used as blank for baseline correction with extinction coefficients;  $\epsilon_{280} = 232,677 \text{ M}^{-1}\text{cm}^{-1}$  and  $\epsilon_{627} = 0 \text{ M}^{-1}\text{cm}^{-1}$  for trastuzumab (in equation T);  $\epsilon_{280} = 16,381 \text{ M}^{-1}\text{cm}^{-1}$  for  $\epsilon_{627} = 35,488 \text{ M}^{-1}\text{cm}^{-1}$  for 4-((1*E*,3*Z*)-3-(3-(4-((3-azidopropyl)amino)-4-oxobutyl)benzo[*d*]thiazol-2(3*H*)-ylidene)prop-1-en-1-yl)-1-ethylquinolin-1-ium (**9**) measured in water/BBS. FAR values were calculated from Lambert-Beer equation for absorbance at 280 and 627 nm.

$$A_{280\text{nm}} = \epsilon_{9,280\text{nm}} \cdot l \cdot c_9 + \epsilon_{T,280\text{nm}} \cdot l \cdot c_T$$

$$A_{627\text{nm}} = \epsilon_{9,627\text{nm}} \cdot l \cdot c_9 + \epsilon_{T,627\text{nm}} \cdot l \cdot c_T$$

The fluorescence measurements were carried out on a Jasco FP8300 spectrofluorometer, in a quartz standard cell cuvette with a 1 cm light path length. The widths of the excitation slit and the emission slit were both set to 2.5 nm with the scanning speed of 1000 nm/min. Pure solvents were used as blank correction. 1  $\mu$ M HEPES pH=7.4 buffer was used as solvent if not otherwise mentioned. The absorbance spectra were measured from 250 nm to 700 nm. The excitation spectra were recorded between 250 nm and 700 nm. To measure the emission spectra, the sample irradiated at the excitation maximum, and the respective emission spectrum was recorded from a wavelength 10 nm greater than that of the excitation maximum up to 800 nm. The quantum yields were determined by recording the fluorescence spectra of a series of concentrations. The gradient of the integrated fluorescence intensities was plotted against absorbance at the excitation wavelength and was used for the calculation of the quantum yields as follows:

$$\Phi_x = \Phi_{St} \cdot \left( \frac{Grad_x}{Grad_{St}} \right) \cdot \left( \frac{\eta_x^2}{\eta_{St}^2} \right)$$

Compound **9** was excited at 555 nm and Cresyl violet was used as a reference ( $\Phi_F^{MeOH}=0.54$ ). During the computations we used refraction coefficient values from the literature<sup>9</sup>.

The solvent screen measurement was carried out with 5  $\mu$ M solutions of the cyanine (**9**) in acetonitrile, 1,4-dioxane, HEPES buffer, dichloromethane, tetrahydrofuran, ethanol, and ethyl acetate.

The photostability measurement was carried out with 5  $\mu$ M solutions of compound **9** in HEPES. We used a 7 W, 630 nm emitting diode, and measured the emission spectra every 5 minutes for 10 minutes. During the photostability measurements the solutions were excited at 627 nm. As a reference Cyanine5 dye was used with the same conditions. For the emission spectra recording the solution was excited at 647 nm.

## Trastuzumab reconjugation with DBPD-CO

The reconjugation was carried out by procedure described in detail elsewhere<sup>10</sup> The resulting T-CO conjugate (**10**) was buffer-exchanged twice using a Vivaspin500 10 kDa MWCO membrane filter. At the last step the retentate was further purified to remove the small molecular reactants with ZebaSpin 7 kDa MWCO columns. The conjugate was investigated with UV/Vis absorbance measurement and non-reducing SDS-PAGE (see for example at Figure S23). The DAR was calculated from the absorbance spectra and it is resulted DAR=4.

*The Click reaction between compound 9 and the T-CO conjugate (10), and the resulting fluorescent conjugate (11)*

To 13  $\mu\text{L}$  of T-CO (**10**, 0.00078  $\mu\text{mol}$ ,  $c=59.77 \mu\text{M}$ ) solution 0.39  $\mu\text{L}$  20 mM **9** cyanine azide (0.0078  $\mu\text{mol}$ , 10 equiv.) was added. The reaction mixture was gently shaken overnight. The solution was filtered twice using a Vivaspin500 10 kDa MWCO membrane filter to remove the buffer. At the last step the retentate was further purified to remove the small molecular reactants with ZebaSpin 7 kDa MWCO columns. The conjugate (**11**) was investigated with UV/Vis absorbance measurements (Table S2) and non-reducing SDS-PAGE. The average FAR determined from UV gives cca. 4.

$$\begin{aligned}A_{280\text{nm}} &= \varepsilon_{9,280\text{nm}} \cdot l \cdot c_9 + \varepsilon_{T,280\text{nm}} \cdot l \cdot c_T \\A_{627\text{nm}} &= \varepsilon_{9,627\text{nm}} \cdot l \cdot c_9 + \varepsilon_{T,627\text{nm}} \cdot l \cdot c_T \\0.039 &= 16381\text{M}^{-1}\text{cm}^{-1} \cdot 0.05\text{cm} \cdot c_9 + 232677\text{M}^{-1}\text{cm}^{-1} \cdot 0.05\text{cm} \cdot c_T \\0.018 &= 35488\text{M}^{-1}\text{cm}^{-1} \cdot 0.05\text{cm} \cdot c_9 + 0\text{M}^{-1}\text{cm}^{-1} \cdot 0.05\text{cm} \cdot c_T \\c_T &= 2.6\mu\text{M}; c_9 = 10.4\mu\text{M}; FAR = \frac{c_9}{c_T} = 4.0\end{aligned}$$

*Cell lines and culture conditions applied in this studies*

MCF-7 (HER2- human breast adenocarcinoma) and NCI-N87-GFP (HER2+ human gastric carcinoma) cell lines were cultured in sterile culture flasks at 37 °C in a humidified atmosphere with 5% CO<sub>2</sub> in an incubator. The cells were cultured in DMEM-F12 (Dulbecco's Modified Eagle's Medium, Nutrient Mixture F12; Gibco, Waltham, Massachusetts, USA), supplemented with 10% FBS (Fetal Bovine Serum; Euroclone, Pero, Italy), 100 units/mL penicillin, 100 mg/mL streptomycin, and 0.25  $\mu\text{g}/\text{mL}$  amphotericin B (Lonza, Basel, Switzerland).

All precedures with these cell lines were carried out in a laminar flow biosafety cabinet.

### *Flow cytometry*

Samples were analyzed with an Attune NxT flow cytometer (ThermoFisher Scientific). Trastuzumab fluorescence (BL1-H) was measured at 488 nm for the excitation and 530/30 nm for the emission spectra, **11** fluorescence (RL1-H) was measured at 633 nm for the excitation and for the 650/16 nm emission spectra. Spectral analysis was performed using the Attune NxT 3.1.2 software.

### *Preparing labelled cells with trastuzumab – cyanine conjugate (11) for FACS*

Human breast cancer cell lines NCI-N87 GFP (HER2 positive) and MCF-7 (HER2 negative) were applied. The cells were cultured in DMEM-F12 medium (Gibco) supplemented with 10% foetal bovine serum (EuroClone), 100 units/mL penicillin, 100 mg/mL streptomycin, and 0.25 µg/mL amphotericin B (Lonza). Both cell lines were maintained at 37 °C in a humidified incubator with 5% CO<sub>2</sub>.

Cultured cells were harvested using 0.25% trypsin in 2.21 mM EDTA (Corning) and washed with fluorescence activated cell sorting (FACS) buffer (pH=7.4 PBS buffer containing 1% FBS). Cells were put 1.5 mL microtubes and stained with 10 µg/mL of the trastuzumab conjugate (**11**) (the antibody was diluted in 3% bovine serum albumin in PBS). The cells were incubated in 200 µL staining volume for 30 minutes at room temperature, then washed three times in 200 µL FACS buffer. Finally, cells were suspended in 500 µL FACS buffer, and the samples underwent FACS analysis.

### *Immunocytochemistry*

Glass coverslips were sterilized in 90% ethanol, and after drying they were placed in 6-well cell culture plates (Starstedt, Nümbrecht, Germany). Cells were suspended using 0.25% trypsin in 2.21 mM EDTA (Corning, Manassas, VA, USA) and washed with PBS (Gibco, Waltham, Massachusetts USA, supplemented with 1% FBS). Approximately 200 000 cells were placed in each well in 1mL of culture medium. After 24 hours of incubation at 37 °C, the cells were washed 3 times with PBS (Gibco, Waltham, Massachusetts, USA) and then fixed in 4% paraformaldehyde (Thermo Scientific, Waltham, Massachusetts, USA) for 10 minutes. After three PBS washes, the non-specific protein binding sites were blocked by incubating the samples in BSA (Sigma, St. Louis, Missouri, USA) for 30 minutes. The cells were incubated with the dye-conjugated primary antibody (**11**) at 20 µg/mL concentration for 1 hour. After three PBS washes the samples were mounted with Vectashield-DAPI (for nucleus staining, Vector, Newark, California, USA). The samples were investigated with both a Zeiss LSM 710 Zeiss LSM 710 confocal microscope (Zeiss, Jena, Germany).

## Photophysical results

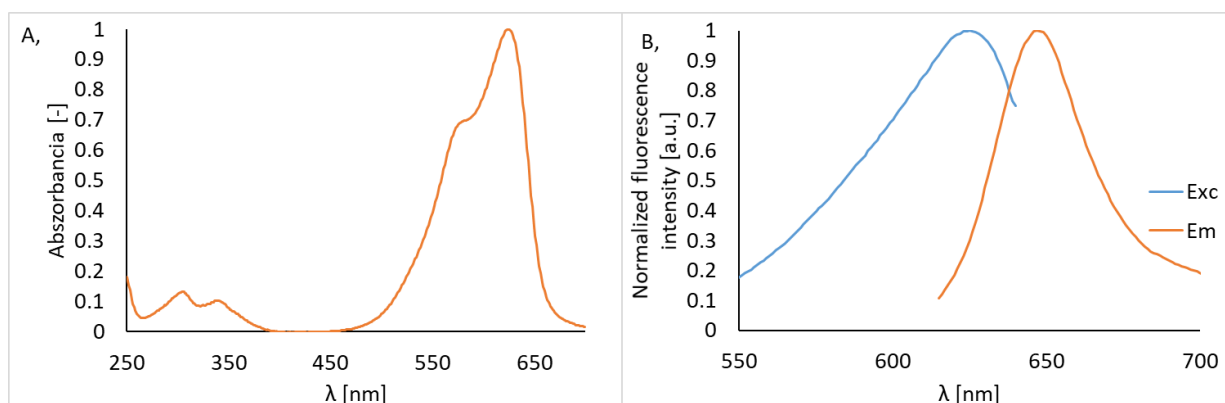

**Figure S19.** (A) Normalized absorption (B) excitation (orange) and fluorescence emission spectra (blue) (B) of **9** in HEPES buffer ( $c= 5 \mu\text{M}$ ,  $\text{pH} = 7.4$ ).

### *Photostability measurement of 9 dye*

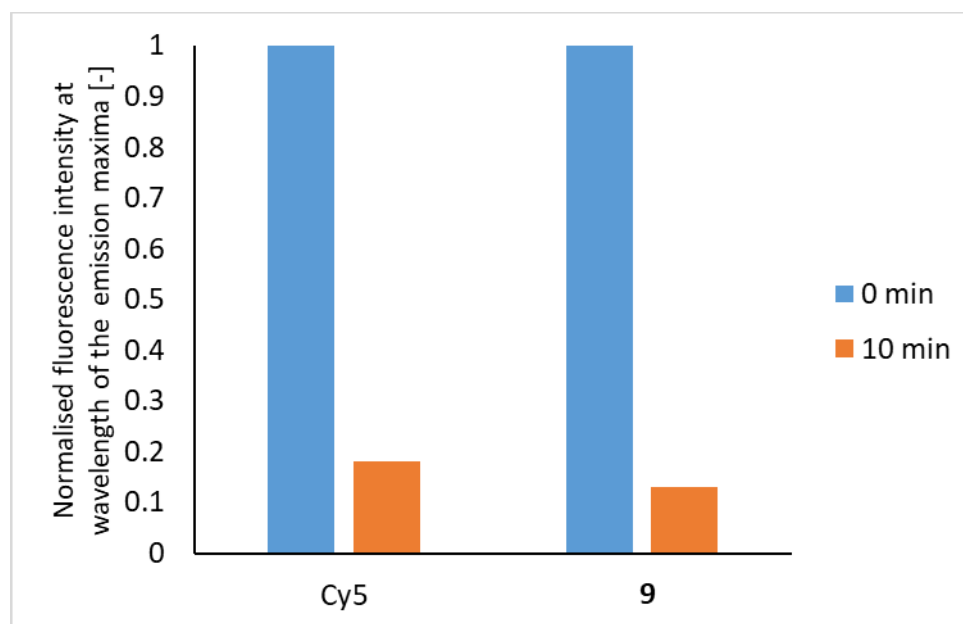

**Figure S20.** Change in emission intensity after 10 minutes in the case of Cyanine5 and **9** cyanine. Both was excited at 630 nm in  $\text{pH}=7.4$  HEPES buffer ( $c= 5 \mu\text{M}$ ).

### Solvent dependence of **9** cyanine derivative

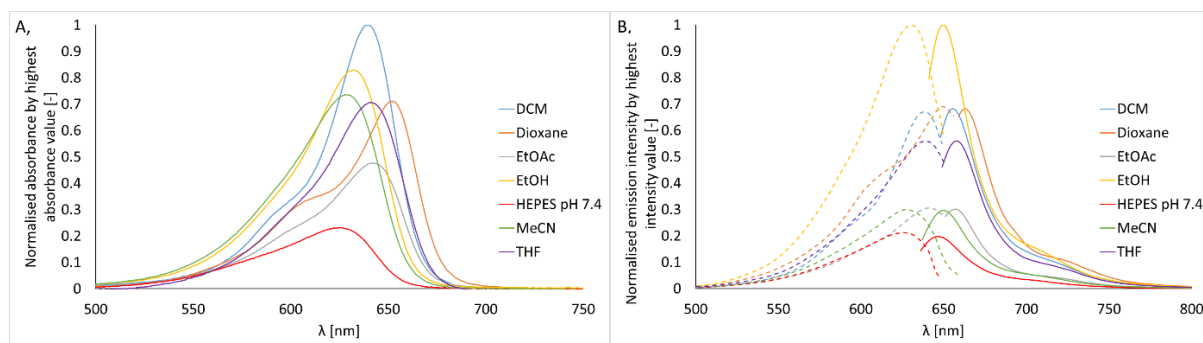

**Figure S21.** Normalized (A) UV-Vis absorption spectra, (B) excitation (dotted line) and fluorescence emission (solid line) spectra at  $c = 5.0 \mu\text{M}$  concentration of **9** in different solvents. Excitations were executed at or near the wavelength position of absorption maxima.

### The pH dependent of absorption and emission spectra of **9**

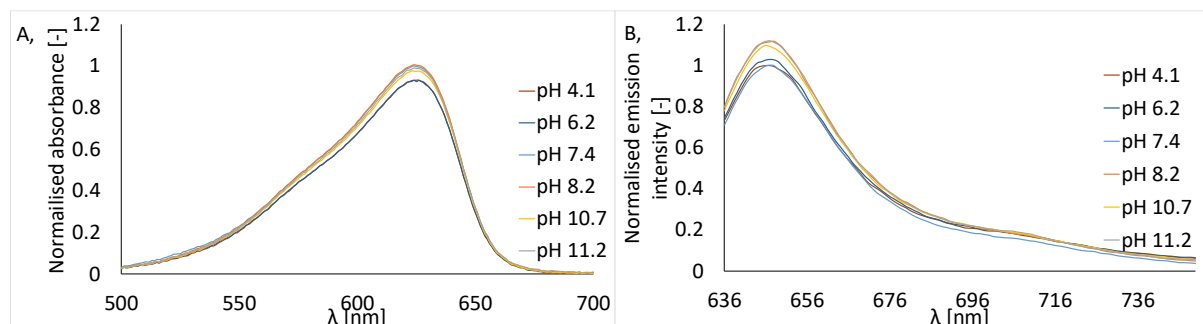

**Figure S22.** (A) pH-dependent UV-Vis absorption spectra of **9** in HEPES buffer ( $c = 5 \mu\text{M}$ ), normalized to absorbance at  $\text{pH} = 7.4$ . The numbers placed at the spectra denote the wavelength of absorption maxima. (B) Fluorescence emission spectra of **9** in HEPES buffer ( $c = 5 \mu\text{M}$ ) at different pH values. Excitation was performed at or near the wavelength position of absorption maxima in the spectra recorded at the same pH values.

### Absorbance measurement of cyanine-trastuzumab conjugate (**11**)

Table S2. Average calculated FAR value from measured absorbance values

| Experiment | Measured Values      |                      |       |       | FAR |
|------------|----------------------|----------------------|-------|-------|-----|
|            | $A_{280 \text{ nm}}$ | $A_{627 \text{ nm}}$ | $c_9$ | $c_T$ |     |
| 1          | 0.030                | 0.016                | 1.9   | 9.0   | 4.7 |
| 2          | 0.48                 | 0.021                | 3.3   | 11.8  | 3.6 |
| AVG        |                      |                      |       |       | 4.2 |

*SDS-PAGE results of **11** conjugate*

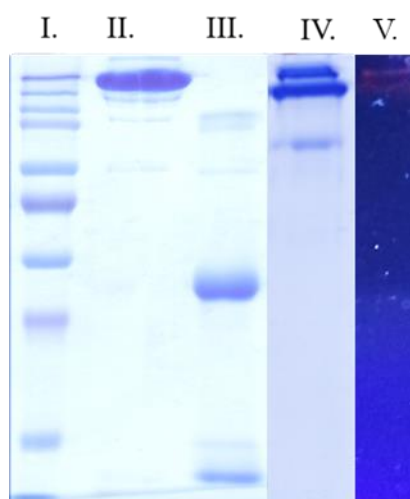

**Figure S23.** SDS-PAGE in non-reducing, denaturing gel. I-IV. Coomassie stained gel, V. Fluorescence of gel ( $\lambda_{exc}$ : 366 nm). I. molecular weight protein marker, II. native trastuzumab, III. Reduced trastuzumab, IV. **11** (fully reconjugated antibody 90%, misbridged half antibody 10%), V. **11** under 366 nm light.

*Flow cytometry measurements of cells without or treated with **11** antibody conjugate*

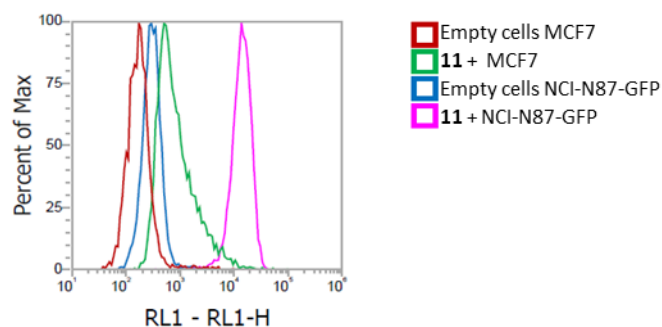

**Figure S24.** Results of the flow cytometry measurement. Red line: untreated MCF-7 cell line (Her2-); green line: trastuzumab-cyanine conjugate (**11**) treated MCF-7 cell line (Her2-); blue line: untreated NCI-N87-GFP cell line (Her2+); pink line: trastuzumab-cyanine conjugate (**11**) treated NCI-N87-GFP cell line (Her2+)



## Raw computational data

**Table S3.** Computed energies ( $E$ ), zero point energies, internal energies ( $U$ ), enthalpies ( $H$ ) and Gibbs free energies ( $G$ ) given in Hartree as well as entropies ( $S$ ) given in  $\text{J mol}^{-1} \text{K}^{-1}$  at B3LYP/6-31G(d,p) basis set with the consideration of PCM solvent method using the parameter set of water for compound **1\***.

| Number | Filename                                   | E              | ZPE          | U            | H            | G            | S       |
|--------|--------------------------------------------|----------------|--------------|--------------|--------------|--------------|---------|
|        | 002aaa_mol_b3lyp631dp_PCMw.log             | -1358.58311524 | -1358.204382 | -1358.182325 | -1358.181381 | -1358.258138 | 161.549 |
|        | 002aba_mol_TD_b3lyp631dp_PCMw_opt.log      | -1358.58095709 | -1358.130776 | -1358.108423 | -1358.107479 | -1358.184683 | 162.489 |
|        | 002aca_mol_b3lyp631dp_PCMw_opt_TRIPLET.log | -1358.53039291 | -1358.153725 | -1358.131361 | -1358.130417 | -1358.208920 | 165.224 |
|        | 002baa_mol_TD_B3LYP631dp_PCMw_opt_rot.log  | -1358.55476917 | -1358.136688 | -1358.114727 | -1358.113783 | -1358.189609 | 159.591 |

**Table S4.** Computed energies ( $E$ ), zero point energies, internal energies ( $U$ ), enthalpies ( $H$ ) and Gibbs free energies ( $G$ ) given in Hartree as well as entropies ( $S$ ) given in  $\text{J mol}^{-1} \text{K}^{-1}$  at B3LYP/6-31G(d,p) basis set with the consideration of PCM solvent method using the parameter set of water for compound **1\***.

| Number | Filename                                 | E              | ZPE          | U            | H            | G            | S       |
|--------|------------------------------------------|----------------|--------------|--------------|--------------|--------------|---------|
|        | 002gdb_mol_b3lyp631dp_+1H2_ARA_PCMw.log  | -1359.71941410 | -1359.319348 | -1359.296676 | -1359.295732 | -1359.373627 | 163.942 |
|        | 002geb_mol_b3lyp631dp_+5H2_ARA_PCMw.log  | -1363.36955790 | -1362.897124 | -1362.873046 | -1362.872102 | -1362.953704 | 171.746 |
|        | 002gfb_mol_b3lyp631dp_+6H2_ARA_PCMw.log  | -1364.60707466 | -1364.110264 | -1364.086079 | -1364.085135 | -1364.166681 | 171.627 |
|        | 002haa_mol_b3lyp631dp_+1H2_ARBb_PCMw.log | -1359.73145182 | -1359.330501 | -1359.307986 | -1359.307041 | -1359.384569 | 163.171 |
|        | 002hba_mol_b3lyp631dp_+3H2_ARBb_PCMw.log | -1362.15479041 | -1361.705371 | -1361.682175 | -1361.681231 | -1361.759340 | 164.394 |
|        | 002hca_mol_b3lyp631dp_+4H2_ARBb_PCMw.log | -1363.38459174 | -1362.910609 | -1362.887280 | -1362.886336 | -1362.965017 | 165.599 |
|        | 002daa_mol_b3lyp631dp_+1H2_OL_PCMw.log   | -1359.78358699 | -1359.381527 | -1359.359038 | -1359.358094 | -1359.436007 | 163.982 |
|        | 002dba_mol_b3lyp631dp_+1H2_OL2_PCMw.log  | -1359.77342070 | -1359.371325 | -1359.348948 | -1359.348003 | -1359.426036 | 164.234 |
|        | 002dca_mol_b3lyp631dp_+1H2_OL3_PCMw.log  | -1359.75899240 | -1359.357922 | -1359.335339 | -1359.334395 | -1359.412870 | 165.165 |
|        | 002dda_mol_b3lyp631dp_+1H2_OL4_PCMw.log  | -1359.77236548 | -1359.370587 | -1359.348085 | -1359.347141 | -1359.425714 | 165.370 |
|        | 002dea_mol_b3lyp631dp_+1H2_OL5_PCMw.log  | -1359.77604126 | -1359.374292 | -1359.351776 | -1359.350832 | -1359.428307 | 163.060 |
|        | 002eaa_mol_b3lyp631dp_+2H2_OL_PCMw.log   | -1361.00218861 | -1360.576188 | -1360.553480 | -1360.552536 | -1360.630831 | 164.785 |

**Table S4.** Computed energies ( $E$ ), zero point energies, internal energies ( $U$ ), enthalpies ( $H$ ) and Gibbs free energies ( $G$ ) given in Hartree as well as entropies ( $S$ ) given in  $\text{J mol}^{-1} \text{K}^{-1}$  at B3LYP/6-31G(d,p) basis set with the consideration of PCM solvent method using the parameter set of water for compound **1\***.

| Number | Filename                                           | E              | ZPE          | U            | H            | G            | S       |
|--------|----------------------------------------------------|----------------|--------------|--------------|--------------|--------------|---------|
|        | 002haa_mol_TDb3lyp631dp_+1H2_ARBb_PCMw_opt.log     | -1359.72903875 | -1359.248778 | -1359.225936 | -1359.224991 | -1359.303057 | 164.302 |
|        | 002gdb_mol_TDb3lyp631dp_+1H2_ARA_PCMw_opt.log      | -1359.71747555 | -1359.244909 | -1359.221865 | -1359.220921 | -1359.299903 | 166.232 |
|        | 002fad_mol_TDb3lyp631dp_+1H2_AR_PCMw_opt_rot.log   | -1359.71908349 | -1359.298201 | -1359.275478 | -1359.274534 | -1359.352869 | 164.871 |
|        | 002fae_mol_TDb3lyp631dp_+1H2_AR_PCMw_opt_rot_1.log | -1359.69975008 | -1359.259239 | -1359.236723 | -1359.235779 | -1359.312847 | 162.204 |
|        | 002gde_mol_TDb3lyp631dp_+1H2_ARA_PCMw_opt_rot1.log | -1359.67678887 | -1359.251063 | -1359.228522 | -1359.227577 | -1359.305111 | 163.184 |
|        | 002dab_mol_TDb3lyp631dp_+1H2_OL_PCMw_opt.log       | -1359.77545807 | -1359.332034 | -1359.309467 | -1359.308523 | -1359.386057 | 163.186 |
|        | 002dbb_mol_TDb3lyp631dp_+1H2_OL2_PCMw_opt.log      | -1359.76339533 | -1359.323732 | -1359.300970 | -1359.300026 | -1359.378821 | 165.838 |
|        | 002dcb_mol_TDb3lyp631dp_+1H2_OL3_PCMw_opt.log      | -1359.74781295 | -1359.308813 | -1359.286051 | -1359.285106 | -1359.363776 | 165.573 |
|        | 002ddb_mol_TDb3lyp631dp_+1H2_OL4_PCMw_opt.log      | -1359.74370350 | -1359.315208 | -1359.292526 | -1359.291582 | -1359.370337 | 165.756 |
|        | 002deb_mol_TDb3lyp631dp_+1H2_OL5_PCMw_opt.log      | -1359.76945454 | -1359.310973 | -1359.288194 | -1359.287250 | -1359.365334 | 164.340 |

**Table S5.** Computed energies ( $E$ ), zero point energies, internal energies ( $U$ ), enthalpies ( $H$ ) and Gibbs free energies ( $G$ ) given in Hartree as well as entropies ( $S$ ) given in  $\text{J mol}^{-1} \text{K}^{-1}$  at B3LYP/6-31G(d,p) basis set with the consideration of PCM solvent method using the parameter set of water for compound **1\***.

| Number | Filename                                               | E              | ZPE          | U            | H            | G            | S       |
|--------|--------------------------------------------------------|----------------|--------------|--------------|--------------|--------------|---------|
|        | 002hac_mol_TDb3lyp631dp_+1H2_ARBb_PCMw_opt_TRIPLET.log | -1359.67471110 | -1359.275997 | -1359.253129 | -1359.252185 | -1359.331134 | 166.161 |
|        | 002gdc_mol_TDb3lyp631dp_+1H2_ARA_PCMw_opt_TRIPLET.log  | -1359.66999705 | -1359.271695 | -1359.248711 | -1359.247767 | -1359.327601 | 168.026 |
|        | 002dac_mol_b3lyp631dp_+1H2_OL_PCMw_triplet.log         | -1359.72745045 | -1359.328552 | -1359.305763 | -1359.304819 | -1359.384457 | 167.613 |
|        | 002dbc_mol_b3lyp631dp_+1H2_OL2_PCMw_triplet.log        | -1359.72100428 | -1359.321729 | -1359.299014 | -1359.298070 | -1359.377177 | 166.495 |
|        | 002dcc_mol_b3lyp631dp_+1H2_OL3_PCMw_triplet.log        | -1359.70689076 | -1359.308569 | -1359.285619 | -1359.284675 | -1359.365143 | 169.359 |
|        | 002ddc_mol_b3lyp631dp_+1H2_OL4_PCMw_triplet.log        | -1359.71385220 | -1359.314163 | -1359.291197 | -1359.290253 | -1359.371761 | 171.548 |
|        | 002dec_mol_b3lyp631dp_+1H2_OL5_PCMw_triplet.log        | -1359.72845502 | -1359.328640 | -1359.305778 | -1359.304834 | -1359.384340 | 167.335 |

**Table S7.** Computed energies ( $E$ ), zero point energies, internal energies ( $U$ ), enthalpies ( $H$ ) and Gibbs free energies ( $G$ ) given in Hartree as well as entropies ( $S$ ) given in  $\text{J mol}^{-1} \text{K}^{-1}$  at B3LYP/6-31G(d,p) basis set with the consideration of PCM solvent method using the parameter set of water for compound **1\***.

| Number | Filename                                 | E             | ZPE         | U           | H           | G           | S      |
|--------|------------------------------------------|---------------|-------------|-------------|-------------|-------------|--------|
|        | H2                                       | -1.17867441   | -1.168517   | -1.166156   | -1.165212   | -1.180005   | 31.134 |
|        | 000baa_benzene_b3lyp631dp_PCMw.log       | -232.26074862 | -232.160178 | -232.155795 | -232.154850 | -232.187640 | 69.012 |
|        | 000ba_benzene_+1H2_b3lyp631dp_PCMw.log   | -233.43269415 | -233.310409 | -233.305209 | -233.304265 | -233.338686 | 72.445 |
|        | 000ca_benzene_+2H2_b3lyp631dp_PCMw.log   | -234.66359619 | -234.517431 | -234.511914 | -234.510970 | -234.546076 | 73.886 |
|        | 000da_benzene_+3H2_b3lyp631dp_PCMw.log   | -235.89731046 | -235.727125 | -235.721399 | -235.720455 | -235.755914 | 74.631 |
|        | 001aaa_cyclobutadine_b3lyp631dp_PCMw.log | -154.68443666 | -154.623272 | -154.619489 | -154.618545 | -154.648576 | 63.207 |
|        | 001baa_cyclobutene_b3lyp631dp_PCMw.log   | -155.98312337 | -155.896616 | -155.892795 | -155.891851 | -155.922231 | 63.940 |
|        | 001caa_cyclobutane_b3lyp631dp_PCMw.log   | -157.22469628 | -157.113944 | -157.109795 | -157.108851 | -157.140101 | 65.771 |

**The coordinates of all computed geometries are the following:**

002aaa\_mol\_b3lyp631dp\_PCMw.log

Standard orientation:

| Center<br>Number | Atomic<br>Number | Atomic<br>Type | Coordinates (Angstroms) |           |           |
|------------------|------------------|----------------|-------------------------|-----------|-----------|
|                  |                  |                | X                       | Y         | Z         |
| 1                | 6                | 0              | 5.998031                | 2.114930  | -0.093920 |
| 2                | 6                | 0              | 5.944338                | 0.735984  | -0.157904 |
| 3                | 6                | 0              | 4.700243                | 0.067741  | -0.170627 |
| 4                | 6                | 0              | 3.484941                | 0.819159  | -0.108433 |
| 5                | 6                | 0              | 3.592736                | 2.230047  | -0.046423 |
| 6                | 6                | 0              | 4.815197                | 2.870510  | -0.039049 |
| 7                | 1                | 0              | 6.963409                | 2.610072  | -0.086516 |
| 8                | 1                | 0              | 6.868537                | 0.176442  | -0.195844 |
| 9                | 6                | 0              | 2.196177                | 0.136223  | -0.113060 |
| 10               | 1                | 0              | 2.694649                | 2.831981  | -0.006287 |
| 11               | 1                | 0              | 4.860214                | 3.953146  | 0.008989  |
| 12               | 6                | 0              | 2.251664                | -1.276509 | -0.196704 |
| 13               | 6                | 0              | 3.445245                | -1.945418 | -0.259609 |
| 14               | 1                | 0              | 1.350823                | -1.874689 | -0.211210 |
| 15               | 1                | 0              | 3.477900                | -3.026087 | -0.320120 |
| 16               | 6                | 0              | 5.871451                | -2.156515 | -0.268066 |
| 17               | 6                | 0              | 6.465416                | -2.373267 | 1.123464  |
| 18               | 1                | 0              | 6.589429                | -1.698119 | -0.949637 |
| 19               | 1                | 0              | 5.586021                | -3.111218 | -0.711889 |
| 20               | 1                | 0              | 7.354866                | -3.003821 | 1.039288  |
| 21               | 1                | 0              | 6.757906                | -1.431340 | 1.593771  |
| 22               | 1                | 0              | 5.747247                | -2.877024 | 1.776086  |
| 23               | 7                | 0              | 4.646485                | -1.321677 | -0.249013 |
| 24               | 6                | 0              | 0.971402                | 0.849011  | -0.035145 |
| 25               | 6                | 0              | -0.293958               | 0.284560  | -0.050894 |
| 26               | 1                | 0              | 1.010824                | 1.928751  | 0.046932  |
| 27               | 1                | 0              | -0.383580               | -0.796145 | -0.138347 |
| 28               | 6                | 0              | -1.481760               | 1.022695  | 0.039250  |
| 29               | 1                | 0              | -1.409805               | 2.100711  | 0.132347  |
| 30               | 6                | 0              | -2.755140               | 0.460482  | 0.019612  |
| 31               | 6                | 0              | -4.820695               | -0.973537 | -0.058436 |
| 32               | 6                | 0              | -5.088439               | 0.399253  | 0.077730  |
| 33               | 6                | 0              | -5.844348               | -1.915129 | -0.117992 |
| 34               | 6                | 0              | -6.411313               | 0.846383  | 0.157031  |
| 35               | 6                | 0              | -7.162076               | -1.463353 | -0.038722 |
| 36               | 1                | 0              | -5.621064               | -2.971110 | -0.223056 |
| 37               | 6                | 0              | -7.436358               | -0.097024 | 0.097287  |
| 38               | 1                | 0              | -6.649281               | 1.897636  | 0.262909  |
| 39               | 1                | 0              | -7.976595               | -2.178398 | -0.082874 |
| 40               | 1                | 0              | -8.465332               | 0.241529  | 0.158155  |
| 41               | 7                | 0              | -3.918936               | 1.169351  | 0.117399  |
| 42               | 16               | 0              | -3.083960               | -1.266921 | -0.135296 |
| 43               | 6                | 0              | -3.906650               | 2.626611  | 0.258809  |
| 44               | 1                | 0              | -3.372963               | 2.910694  | 1.168861  |
| 45               | 1                | 0              | -3.422255               | 3.083942  | -0.607129 |
| 46               | 1                | 0              | -4.927072               | 2.993022  | 0.322422  |

002aba\_mol\_b3lyp631dp\_PCMw\_SCAN\_1.log

Standard orientation:

| Center<br>Number | Atomic<br>Number | Atomic<br>Type | Coordinates (Angstroms) |           |          |
|------------------|------------------|----------------|-------------------------|-----------|----------|
|                  |                  |                | X                       | Y         | Z        |
| 1                | 6                | 0              | 4.056221                | -2.883264 | 0.383511 |
| 2                | 6                | 0              | 4.881265                | -1.793931 | 0.181914 |

|    |    |   |           |           |           |
|----|----|---|-----------|-----------|-----------|
| 3  | 6  | 0 | 4.355057  | -0.483027 | 0.185633  |
| 4  | 6  | 0 | 2.943857  | -0.277426 | 0.332613  |
| 5  | 6  | 0 | 2.153678  | -1.422227 | 0.596380  |
| 6  | 6  | 0 | 2.685777  | -2.696289 | 0.621031  |
| 7  | 1  | 0 | 4.481690  | -3.881248 | 0.385753  |
| 8  | 1  | 0 | 5.939777  | -1.958610 | 0.037470  |
| 9  | 6  | 0 | 2.397191  | 1.073223  | 0.246173  |
| 10 | 1  | 0 | 1.109372  | -1.299583 | 0.836371  |
| 11 | 1  | 0 | 2.046091  | -3.545514 | 0.835338  |
| 12 | 6  | 0 | 3.360889  | 2.113820  | 0.275128  |
| 13 | 6  | 0 | 4.703581  | 1.863965  | 0.173188  |
| 14 | 1  | 0 | 3.037736  | 3.147175  | 0.311851  |
| 15 | 1  | 0 | 5.426493  | 2.669334  | 0.142748  |
| 16 | 6  | 0 | 6.665087  | 0.456201  | -0.151774 |
| 17 | 6  | 0 | 7.007910  | 0.165239  | -1.612440 |
| 18 | 1  | 0 | 7.039663  | -0.320994 | 0.516250  |
| 19 | 1  | 0 | 7.126906  | 1.391471  | 0.167051  |
| 20 | 1  | 0 | 8.093083  | 0.077344  | -1.714623 |
| 21 | 1  | 0 | 6.556010  | -0.766761 | -1.960445 |
| 22 | 1  | 0 | 6.665677  | 0.977685  | -2.258980 |
| 23 | 7  | 0 | 5.208764  | 0.612045  | 0.077651  |
| 24 | 6  | 0 | 1.039493  | 1.486957  | 0.168524  |
| 25 | 6  | 0 | -0.148063 | 0.773770  | 0.102740  |
| 26 | 1  | 0 | 0.919293  | 2.568263  | 0.210183  |
| 27 | 1  | 0 | -0.128247 | -0.302303 | -0.027840 |
| 28 | 6  | 0 | -1.408974 | 1.387396  | 0.129142  |
| 29 | 1  | 0 | -1.452719 | 2.464264  | 0.249657  |
| 30 | 6  | 0 | -2.615301 | 0.701218  | 0.021680  |
| 31 | 6  | 0 | -4.517644 | -0.930385 | -0.199227 |
| 32 | 6  | 0 | -4.929981 | 0.405660  | -0.057539 |
| 33 | 6  | 0 | -5.436107 | -1.967997 | -0.333311 |
| 34 | 6  | 0 | -6.293629 | 0.716787  | -0.047875 |
| 35 | 6  | 0 | -6.795029 | -1.651651 | -0.323537 |
| 36 | 1  | 0 | -5.102256 | -2.994073 | -0.442509 |
| 37 | 6  | 0 | -7.213097 | -0.322796 | -0.181927 |
| 38 | 1  | 0 | -6.642072 | 1.736563  | 0.060418  |
| 39 | 1  | 0 | -7.529538 | -2.443195 | -0.426538 |
| 40 | 1  | 0 | -8.272794 | -0.090183 | -0.175542 |
| 41 | 7  | 0 | -3.848644 | 1.287823  | 0.061270  |
| 42 | 16 | 0 | -2.758472 | -1.046460 | -0.180491 |
| 43 | 6  | 0 | -3.992348 | 2.735949  | 0.220955  |
| 44 | 1  | 0 | -3.550270 | 3.055328  | 1.167783  |
| 45 | 1  | 0 | -3.501684 | 3.255114  | -0.605657 |
| 46 | 1  | 0 | -5.046506 | 2.997042  | 0.220787  |

-----  
002aba\_mol\_TD\_b3lyp631dp\_PCMw\_opt.log

Standard orientation:

| Center<br>Number | Atomic<br>Number | Atomic<br>Type | Coordinates (Angstroms) |           |           |
|------------------|------------------|----------------|-------------------------|-----------|-----------|
|                  |                  |                | X                       | Y         | Z         |
| 1                | 6                | 0              | 5.952936                | 2.176988  | -0.262247 |
| 2                | 6                | 0              | 5.938419                | 0.786886  | -0.235626 |
| 3                | 6                | 0              | 4.720232                | 0.083870  | -0.182516 |
| 4                | 6                | 0              | 3.474435                | 0.804048  | -0.133996 |
| 5                | 6                | 0              | 3.541249                | 2.216761  | -0.182173 |
| 6                | 6                | 0              | 4.751091                | 2.893177  | -0.241498 |
| 7                | 1                | 0              | 6.903281                | 2.698802  | -0.303725 |
| 8                | 1                | 0              | 6.879256                | 0.254559  | -0.255388 |
| 9                | 6                | 0              | 2.227325                | 0.073432  | -0.051141 |
| 10               | 1                | 0              | 2.625126                | 2.793469  | -0.183852 |
| 11               | 1                | 0              | 4.760311                | 3.977833  | -0.273961 |
| 12               | 6                | 0              | 2.306677                | -1.341021 | -0.059377 |
| 13               | 6                | 0              | 3.513244                | -1.986412 | -0.121880 |
| 14               | 1                | 0              | 1.415494                | -1.951343 | 0.009516  |

|    |    |   |           |           |           |
|----|----|---|-----------|-----------|-----------|
| 15 | 1  | 0 | 3.586043  | -3.066149 | -0.120225 |
| 16 | 6  | 0 | 5.945287  | -2.103895 | -0.206426 |
| 17 | 6  | 0 | 6.589580  | -2.242377 | 1.174703  |
| 18 | 1  | 0 | 6.630388  | -1.651544 | -0.926163 |
| 19 | 1  | 0 | 5.682278  | -3.087004 | -0.600453 |
| 20 | 1  | 0 | 7.497981  | -2.845535 | 1.089374  |
| 21 | 1  | 0 | 6.861590  | -1.271184 | 1.595160  |
| 22 | 1  | 0 | 5.908640  | -2.741516 | 1.869519  |
| 23 | 7  | 0 | 4.698715  | -1.310683 | -0.185015 |
| 24 | 6  | 0 | 0.959401  | 0.746980  | 0.057629  |
| 25 | 6  | 0 | -0.292634 | 0.170987  | -0.039737 |
| 26 | 1  | 0 | 0.979124  | 1.815190  | 0.249115  |
| 27 | 1  | 0 | -0.385346 | -0.888785 | -0.260915 |
| 28 | 6  | 0 | -1.483311 | 0.928284  | 0.130519  |
| 29 | 1  | 0 | -1.377172 | 1.988697  | 0.336657  |
| 30 | 6  | 0 | -2.768381 | 0.417089  | 0.057650  |
| 31 | 6  | 0 | -4.856474 | -0.956210 | -0.143722 |
| 32 | 6  | 0 | -5.097444 | 0.417185  | 0.111809  |
| 33 | 6  | 0 | -5.901119 | -1.866923 | -0.282990 |
| 34 | 6  | 0 | -6.419890 | 0.878191  | 0.232668  |
| 35 | 6  | 0 | -7.207715 | -1.396974 | -0.163578 |
| 36 | 1  | 0 | -5.698852 | -2.914037 | -0.478839 |
| 37 | 6  | 0 | -7.455962 | -0.037252 | 0.092372  |
| 38 | 1  | 0 | -6.638523 | 1.919546  | 0.432788  |
| 39 | 1  | 0 | -8.037707 | -2.087235 | -0.268261 |
| 40 | 1  | 0 | -8.479509 | 0.310549  | 0.184434  |
| 41 | 7  | 0 | -3.931338 | 1.151474  | 0.212608  |
| 42 | 16 | 0 | -3.136881 | -1.283600 | -0.246298 |
| 43 | 6  | 0 | -3.882709 | 2.591592  | 0.462716  |
| 44 | 1  | 0 | -3.380439 | 2.791851  | 1.412814  |
| 45 | 1  | 0 | -3.345833 | 3.092051  | -0.346947 |
| 46 | 1  | 0 | -4.893094 | 2.987408  | 0.508014  |

-----  
002abb\_mol\_b3lyp631dp\_PCMw\_SCAN\_2\_f.log

Standard orientation:

| Center<br>Number | Atomic<br>Number | Atomic<br>Type | Coordinates (Angstroms) |           |           |
|------------------|------------------|----------------|-------------------------|-----------|-----------|
|                  |                  |                | X                       | Y         | Z         |
| 1                | 6                | 0              | -3.941586               | -2.841077 | -0.620216 |
| 2                | 6                | 0              | -4.781040               | -1.806222 | -0.254178 |
| 3                | 6                | 0              | -4.302240               | -0.478524 | -0.203979 |
| 4                | 6                | 0              | -2.919076               | -0.208252 | -0.460690 |
| 5                | 6                | 0              | -2.119158               | -1.291520 | -0.898516 |
| 6                | 6                | 0              | -2.608950               | -2.580479 | -0.976221 |
| 7                | 1                | 0              | -4.331270               | -3.852728 | -0.662655 |
| 8                | 1                | 0              | -5.814487               | -2.025843 | -0.025105 |
| 9                | 6                | 0              | -2.410508               | 1.150449  | -0.319121 |
| 10               | 1                | 0              | -1.109723               | -1.098715 | -1.230631 |
| 11               | 1                | 0              | -1.968755               | -3.383317 | -1.325399 |
| 12               | 6                | 0              | -3.401191               | 2.157605  | -0.204095 |
| 13               | 6                | 0              | -4.720490               | 1.849419  | 0.000549  |
| 14               | 1                | 0              | -3.113166               | 3.202031  | -0.196159 |
| 15               | 1                | 0              | -5.462770               | 2.622498  | 0.154029  |
| 16               | 6                | 0              | -6.594493               | 0.348865  | 0.419303  |
| 17               | 6                | 0              | -6.778815               | -0.047907 | 1.883503  |
| 18               | 1                | 0              | -7.008836               | -0.398609 | -0.258982 |
| 19               | 1                | 0              | -7.116348               | 1.283623  | 0.210746  |
| 20               | 1                | 0              | -7.844660               | -0.185155 | 2.085790  |
| 21               | 1                | 0              | -6.263675               | -0.981768 | 2.121461  |
| 22               | 1                | 0              | -6.400256               | 0.734692  | 2.546451  |
| 23               | 7                | 0              | -5.174178               | 0.575064  | 0.060221  |
| 24               | 6                | 0              | -1.056881               | 1.580878  | -0.306968 |
| 25               | 6                | 0              | 0.116423                | 0.850910  | -0.196377 |
| 26               | 1                | 0              | -0.935965               | 2.660805  | -0.371230 |

|    |    |   |          |           |           |
|----|----|---|----------|-----------|-----------|
| 27 | 1  | 0 | 0.061292 | -0.216910 | -0.009883 |
| 28 | 6  | 0 | 1.392651 | 1.431718  | -0.237674 |
| 29 | 1  | 0 | 1.465127 | 2.498526  | -0.418635 |
| 30 | 6  | 0 | 2.578606 | 0.723983  | -0.066996 |
| 31 | 6  | 0 | 4.432953 | -0.938288 | 0.292661  |
| 32 | 6  | 0 | 4.883038 | 0.375059  | 0.074389  |
| 33 | 6  | 0 | 5.320996 | -1.988210 | 0.509749  |
| 34 | 6  | 0 | 6.254372 | 0.650325  | 0.073135  |
| 35 | 6  | 0 | 6.687872 | -1.707839 | 0.506640  |
| 36 | 1  | 0 | 4.957951 | -2.996390 | 0.676951  |
| 37 | 6  | 0 | 7.143474 | -0.401632 | 0.290286  |
| 38 | 1  | 0 | 6.631501 | 1.652267  | -0.091033 |
| 39 | 1  | 0 | 7.399106 | -2.509646 | 0.673697  |
| 40 | 1  | 0 | 8.208877 | -0.196649 | 0.290743  |
| 41 | 7  | 0 | 3.827907 | 1.274829  | -0.122725 |
| 42 | 16 | 0 | 2.671813 | -1.010472 | 0.248991  |
| 43 | 6  | 0 | 4.012549 | 2.705362  | -0.372848 |
| 44 | 1  | 0 | 3.566433 | 2.978452  | -1.331977 |
| 45 | 1  | 0 | 3.549544 | 3.290116  | 0.425729  |
| 46 | 1  | 0 | 5.073948 | 2.933276  | -0.404259 |

002aca\_mol\_b3lyp631dp\_PCMw\_opt\_TRIPLET.log

Standard orientation:

| Center<br>Number | Atomic<br>Number | Atomic<br>Type | Coordinates (Angstroms) |           |           |
|------------------|------------------|----------------|-------------------------|-----------|-----------|
|                  |                  |                | X                       | Y         | Z         |
| 1                | 6                | 0              | 5.942658                | 2.213903  | -0.105324 |
| 2                | 6                | 0              | 5.939777                | 0.826894  | -0.166413 |
| 3                | 6                | 0              | 4.728667                | 0.110734  | -0.175021 |
| 4                | 6                | 0              | 3.478179                | 0.809073  | -0.110971 |
| 5                | 6                | 0              | 3.531045                | 2.219072  | -0.052573 |
| 6                | 6                | 0              | 4.732022                | 2.912536  | -0.049734 |
| 7                | 1                | 0              | 6.887617                | 2.746691  | -0.100343 |
| 8                | 1                | 0              | 6.885858                | 0.304597  | -0.204031 |
| 9                | 6                | 0              | 2.229451                | 0.056150  | -0.110465 |
| 10               | 1                | 0              | 2.610347                | 2.787574  | -0.009507 |
| 11               | 1                | 0              | 4.727021                | 3.996653  | -0.003319 |
| 12               | 6                | 0              | 2.338047                | -1.360282 | -0.183342 |
| 13               | 6                | 0              | 3.552747                | -1.983250 | -0.248247 |
| 14               | 1                | 0              | 1.455929                | -1.986906 | -0.189994 |
| 15               | 1                | 0              | 3.641314                | -3.060272 | -0.303467 |
| 16               | 6                | 0              | 5.989653                | -2.063450 | -0.278606 |
| 17               | 6                | 0              | 6.600021                | -2.260788 | 1.110311  |
| 18               | 1                | 0              | 6.686384                | -1.569018 | -0.957863 |
| 19               | 1                | 0              | 5.750725                | -3.029378 | -0.726604 |
| 20               | 1                | 0              | 7.517809                | -2.848783 | 1.020946  |
| 21               | 1                | 0              | 6.848812                | -1.307914 | 1.583865  |
| 22               | 1                | 0              | 5.907781                | -2.800198 | 1.762628  |
| 23               | 7                | 0              | 4.731941                | -1.289372 | -0.251579 |
| 24               | 6                | 0              | 0.960238                | 0.690440  | -0.037355 |
| 25               | 6                | 0              | -0.299479               | 0.085803  | -0.042418 |
| 26               | 1                | 0              | 0.950356                | 1.773994  | 0.032287  |
| 27               | 1                | 0              | -0.389879               | -0.993586 | -0.113348 |
| 28               | 6                | 0              | -1.469107               | 0.862959  | 0.042700  |
| 29               | 1                | 0              | -1.350869               | 1.939905  | 0.116068  |
| 30               | 6                | 0              | -2.775174               | 0.371413  | 0.036428  |
| 31               | 6                | 0              | -4.891635               | -0.960021 | -0.048180 |
| 32               | 6                | 0              | -5.100964               | 0.430989  | 0.075902  |
| 33               | 6                | 0              | -5.958256               | -1.854564 | -0.114225 |
| 34               | 6                | 0              | -6.409068               | 0.936816  | 0.130384  |
| 35               | 6                | 0              | -7.252649               | -1.342882 | -0.056330 |
| 36               | 1                | 0              | -5.781223               | -2.920063 | -0.209322 |
| 37               | 6                | 0              | -7.468800               | 0.039401  | 0.064084  |
| 38               | 1                | 0              | -6.601826               | 1.998720  | 0.218541  |

|    |    |   |           |           |           |
|----|----|---|-----------|-----------|-----------|
| 39 | 1  | 0 | -8.098865 | -2.019444 | -0.106227 |
| 40 | 1  | 0 | -8.483434 | 0.421018  | 0.105188  |
| 41 | 7  | 0 | -3.911370 | 1.145717  | 0.129121  |
| 42 | 16 | 0 | -3.176928 | -1.337032 | -0.102171 |
| 43 | 6  | 0 | -3.834072 | 2.601696  | 0.264433  |
| 44 | 1  | 0 | -3.217395 | 2.861626  | 1.127194  |
| 45 | 1  | 0 | -3.408359 | 3.043463  | -0.639794 |
| 46 | 1  | 0 | -4.831068 | 3.003561  | 0.418789  |

-----

002baa\_mol\_TD\_B3LYP631dp\_PCMw\_opt\_rot.log

Standard orientation:

| Center<br>Number | Atomic<br>Number | Atomic<br>Type | Coordinates (Angstroms) |           |           |
|------------------|------------------|----------------|-------------------------|-----------|-----------|
|                  |                  |                | X                       | Y         | Z         |
| 1                | 6                | 0              | 4.736704                | 2.695517  | -0.738810 |
| 2                | 6                | 0              | 5.201370                | 1.376318  | -0.790442 |
| 3                | 6                | 0              | 4.411378                | 0.316388  | -0.325084 |
| 4                | 6                | 0              | 3.111501                | 0.588080  | 0.222341  |
| 5                | 6                | 0              | 2.679492                | 1.933148  | 0.258339  |
| 6                | 6                | 0              | 3.475948                | 2.973222  | -0.214958 |
| 7                | 1                | 0              | 5.370030                | 3.495525  | -1.107806 |
| 8                | 1                | 0              | 6.187488                | 1.187961  | -1.193836 |
| 9                | 6                | 0              | 2.307866                | -0.499533 | 0.711021  |
| 10               | 1                | 0              | 1.697846                | 2.151529  | 0.664656  |
| 11               | 1                | 0              | 3.111834                | 3.994909  | -0.171100 |
| 12               | 6                | 0              | 2.836323                | -1.804892 | 0.651262  |
| 13               | 6                | 0              | 4.073873                | -2.040040 | 0.115632  |
| 14               | 1                | 0              | 2.263823                | -2.647516 | 1.021513  |
| 15               | 1                | 0              | 4.499585                | -3.030973 | 0.043891  |
| 16               | 6                | 0              | 6.188654                | -1.352999 | -0.903797 |
| 17               | 6                | 0              | 7.303770                | -1.167739 | 0.128119  |
| 18               | 1                | 0              | 6.378654                | -0.759651 | -1.801583 |
| 19               | 1                | 0              | 6.146917                | -2.395689 | -1.226581 |
| 20               | 1                | 0              | 8.266759                | -1.441285 | -0.313151 |
| 21               | 1                | 0              | 7.367101                | -0.131561 | 0.470799  |
| 22               | 1                | 0              | 7.131087                | -1.806714 | 0.999105  |
| 23               | 7                | 0              | 4.855674                | -1.013779 | -0.387575 |
| 24               | 6                | 0              | 0.980978                | -0.259518 | 1.314786  |
| 25               | 6                | 0              | -0.194374               | -0.289250 | 0.615502  |
| 26               | 1                | 0              | 0.924294                | -0.056083 | 2.387220  |
| 27               | 1                | 0              | -0.154699               | -0.487443 | -0.453378 |
| 28               | 6                | 0              | -1.446464               | -0.078182 | 1.234491  |
| 29               | 1                | 0              | -1.458933               | 0.118429  | 2.300317  |
| 30               | 6                | 0              | -2.675709               | -0.104336 | 0.564351  |
| 31               | 6                | 0              | -4.583334               | -0.236892 | -1.031504 |
| 32               | 6                | 0              | -4.971864               | 0.037855  | 0.295351  |
| 33               | 6                | 0              | -5.521780               | -0.346460 | -2.058920 |
| 34               | 6                | 0              | -6.326865               | 0.212226  | 0.611041  |
| 35               | 6                | 0              | -6.862538               | -0.174020 | -1.736045 |
| 36               | 1                | 0              | -5.211388               | -0.558834 | -3.075411 |
| 37               | 6                | 0              | -7.256158               | 0.102777  | -0.414266 |
| 38               | 1                | 0              | -6.652576               | 0.427713  | 1.620540  |
| 39               | 1                | 0              | -7.613516               | -0.253623 | -2.514175 |
| 40               | 1                | 0              | -8.308188               | 0.234723  | -0.187026 |
| 41               | 7                | 0              | -3.880622               | 0.101035  | 1.160982  |
| 42               | 16               | 0              | -2.845577               | -0.403560 | -1.151142 |
| 43               | 6                | 0              | -3.994651               | 0.368860  | 2.602028  |
| 44               | 1                | 0              | -3.547824               | -0.451900 | 3.164501  |
| 45               | 1                | 0              | -3.495507               | 1.308401  | 2.844292  |
| 46               | 1                | 0              | -5.043636               | 0.445089  | 2.869006  |

-----

002bba\_mol\_TD\_b3lyp631dp\_PCMw\_SCAN\_1.log



Standard orientation:

| Center<br>Number | Atomic<br>Number | Atomic<br>Type | Coordinates (Angstroms) |           |           |
|------------------|------------------|----------------|-------------------------|-----------|-----------|
|                  |                  |                | X                       | Y         | Z         |
| 1                | 6                | 0              | 4.192685                | -2.899882 | 0.232737  |
| 2                | 6                | 0              | 4.988103                | -1.765548 | 0.126745  |
| 3                | 6                | 0              | 4.415406                | -0.478806 | 0.170070  |
| 4                | 6                | 0              | 2.983196                | -0.328530 | 0.266543  |
| 5                | 6                | 0              | 2.226780                | -1.513143 | 0.416178  |
| 6                | 6                | 0              | 2.811011                | -2.773318 | 0.399712  |
| 7                | 1                | 0              | 4.656146                | -3.880428 | 0.200209  |
| 8                | 1                | 0              | 6.057019                | -1.886269 | 0.020380  |
| 9                | 6                | 0              | 2.406300                | 1.002571  | 0.228781  |
| 10               | 1                | 0              | 1.165655                | -1.445562 | 0.593589  |
| 11               | 1                | 0              | 2.189552                | -3.654781 | 0.518685  |
| 12               | 6                | 0              | 3.317745                | 2.087649  | 0.277590  |
| 13               | 6                | 0              | 4.673719                | 1.901297  | 0.228504  |
| 14               | 1                | 0              | 2.944743                | 3.104540  | 0.321978  |
| 15               | 1                | 0              | 5.371404                | 2.727843  | 0.247863  |
| 16               | 6                | 0              | 6.692188                | 0.557299  | -0.000771 |
| 17               | 6                | 0              | 7.137707                | 0.351648  | -1.450102 |
| 18               | 1                | 0              | 7.052320                | -0.242789 | 0.648872  |
| 19               | 1                | 0              | 7.103494                | 1.488798  | 0.391523  |
| 20               | 1                | 0              | 8.229543                | 0.298961  | -1.486781 |
| 21               | 1                | 0              | 6.736129                | -0.573329 | -1.871119 |
| 22               | 1                | 0              | 6.811520                | 1.186878  | -2.075747 |
| 23               | 7                | 0              | 5.224118                | 0.654067  | 0.140685  |
| 24               | 6                | 0              | 1.012817                | 1.370922  | 0.167225  |
| 25               | 6                | 0              | -0.161185               | 0.644662  | 0.090219  |
| 26               | 1                | 0              | 0.868423                | 2.449271  | 0.221710  |
| 27               | 1                | 0              | -0.156711               | -0.430002 | -0.033128 |
| 28               | 6                | 0              | -1.425038               | 1.300848  | 0.097981  |
| 29               | 1                | 0              | -1.427385               | 2.383109  | 0.181859  |
| 30               | 6                | 0              | -2.650253               | 0.662937  | 0.018026  |
| 31               | 6                | 0              | -4.588030               | -0.921819 | -0.135001 |
| 32               | 6                | 0              | -4.968444               | 0.441755  | -0.058223 |
| 33               | 6                | 0              | -5.534729               | -1.939640 | -0.224386 |
| 34               | 6                | 0              | -6.332142               | 0.782653  | -0.067051 |
| 35               | 6                | 0              | -6.883347               | -1.588353 | -0.235049 |
| 36               | 1                | 0              | -5.227048               | -2.977790 | -0.283327 |
| 37               | 6                | 0              | -7.269759               | -0.239079 | -0.156203 |
| 38               | 1                | 0              | -6.656494               | 1.813817  | -0.004007 |
| 39               | 1                | 0              | -7.638940               | -2.363396 | -0.303575 |
| 40               | 1                | 0              | -8.324374               | 0.015559  | -0.163480 |
| 41               | 7                | 0              | -3.883077               | 1.293046  | 0.019527  |
| 42               | 16               | 0              | -2.842965               | -1.089749 | -0.099069 |
| 43               | 6                | 0              | -3.982195               | 2.749639  | 0.102354  |
| 44               | 1                | 0              | -3.585641               | 3.101358  | 1.058701  |
| 45               | 1                | 0              | -3.421329               | 3.207210  | -0.716257 |
| 46               | 1                | 0              | -5.023092               | 3.048618  | 0.020402  |

002bbb\_mol\_TD\_b3lyp631dp\_PCMw\_SCAN\_2\_f.log

Standard orientation:

| Center<br>Number | Atomic<br>Number | Atomic<br>Type | Coordinates (Angstroms) |          |           |
|------------------|------------------|----------------|-------------------------|----------|-----------|
|                  |                  |                | X                       | Y        | Z         |
| 1                | 6                | 0              | 4.394012                | 2.578843 | 1.237236  |
| 2                | 6                | 0              | 4.998035                | 1.556878 | 0.495807  |
| 3                | 6                | 0              | 4.233058                | 0.522195 | -0.059459 |
| 4                | 6                | 0              | 2.812272                | 0.499551 | 0.150848  |
| 5                | 6                | 0              | 2.240789                | 1.548860 | 0.905494  |
| 6                | 6                | 0              | 3.015573                | 2.575903 | 1.439455  |
| 7                | 1                | 0              | 5.011501                | 3.368252 | 1.652961  |

|    |    |   |           |           |           |
|----|----|---|-----------|-----------|-----------|
| 8  | 1  | 0 | 6.071229  | 1.577753  | 0.360154  |
| 9  | 6  | 0 | 2.032093  | -0.573121 | -0.403366 |
| 10 | 1  | 0 | 1.168986  | 1.543693  | 1.071947  |
| 11 | 1  | 0 | 2.542551  | 3.366398  | 2.013649  |
| 12 | 6  | 0 | 2.692619  | -1.566032 | -1.154717 |
| 13 | 6  | 0 | 4.047234  | -1.520008 | -1.346191 |
| 14 | 1  | 0 | 2.135064  | -2.385425 | -1.593520 |
| 15 | 1  | 0 | 4.581884  | -2.270186 | -1.911641 |
| 16 | 6  | 0 | 6.273684  | -0.553523 | -1.038370 |
| 17 | 6  | 0 | 7.033674  | -1.173619 | 0.136546  |
| 18 | 1  | 0 | 6.636877  | 0.453897  | -1.256231 |
| 19 | 1  | 0 | 6.438258  | -1.142584 | -1.943308 |
| 20 | 1  | 0 | 8.105167  | -1.192721 | -0.083514 |
| 21 | 1  | 0 | 6.884308  | -0.604614 | 1.057999  |
| 22 | 1  | 0 | 6.700144  | -2.200878 | 0.310388  |
| 23 | 7  | 0 | 4.820983  | -0.496326 | -0.825977 |
| 24 | 6  | 0 | 0.563310  | -0.616294 | -0.239062 |
| 25 | 6  | 0 | -0.055781 | -1.314086 | 0.763287  |
| 26 | 1  | 0 | -0.037016 | -0.100884 | -0.989488 |
| 27 | 1  | 0 | 0.586468  | -1.867047 | 1.443818  |
| 28 | 6  | 0 | -1.441210 | -1.457187 | 1.029825  |
| 29 | 1  | 0 | -1.690398 | -2.182155 | 1.794686  |
| 30 | 6  | 0 | -2.539249 | -0.781697 | 0.470248  |
| 31 | 6  | 0 | -4.193393 | 0.737073  | -0.618743 |
| 32 | 6  | 0 | -4.782281 | -0.276757 | 0.161180  |
| 33 | 6  | 0 | -4.967668 | 1.679291  | -1.297898 |
| 34 | 6  | 0 | -6.177679 | -0.352262 | 0.284013  |
| 35 | 6  | 0 | -6.349254 | 1.592955  | -1.176351 |
| 36 | 1  | 0 | -4.503111 | 2.453554  | -1.897111 |
| 37 | 6  | 0 | -6.943431 | 0.587952  | -0.390950 |
| 38 | 1  | 0 | -6.654562 | -1.111062 | 0.890996  |
| 39 | 1  | 0 | -6.976341 | 2.312274  | -1.691277 |
| 40 | 1  | 0 | -8.023638 | 0.545555  | -0.306548 |
| 41 | 7  | 0 | -3.832379 | -1.115629 | 0.740351  |
| 42 | 16 | 0 | -2.449018 | 0.616539  | -0.574196 |
| 43 | 6  | 0 | -4.193759 | -2.271544 | 1.574799  |
| 44 | 1  | 0 | -3.576476 | -3.125808 | 1.301159  |
| 45 | 1  | 0 | -4.060473 | -2.030262 | 2.631319  |
| 46 | 1  | 0 | -5.232258 | -2.528916 | 1.388287  |

-----  
002cba\_mol\_b3lyp631dp\_PCMw\_TRIPLET\_SCAN\_1\_f.log

Standard orientation:

| Center<br>Number | Atomic<br>Number | Atomic<br>Type | Coordinates (Angstroms) |           |           |
|------------------|------------------|----------------|-------------------------|-----------|-----------|
|                  |                  |                | X                       | Y         | Z         |
| 1                | 6                | 0              | -4.123486               | -2.832350 | -0.636032 |
| 2                | 6                | 0              | -4.904035               | -1.751159 | -0.244958 |
| 3                | 6                | 0              | -4.362299               | -0.453406 | -0.198334 |
| 4                | 6                | 0              | -2.976206               | -0.244509 | -0.503848 |
| 5                | 6                | 0              | -2.236098               | -1.363222 | -0.939848 |
| 6                | 6                | 0              | -2.790482               | -2.635250 | -1.005160 |
| 7                | 1                | 0              | -4.563232               | -3.823731 | -0.666302 |
| 8                | 1                | 0              | -5.939768               | -1.922873 | 0.013880  |
| 9                | 6                | 0              | -2.415073               | 1.097148  | -0.405686 |
| 10               | 1                | 0              | -1.215313               | -1.222320 | -1.267379 |
| 11               | 1                | 0              | -2.185664               | -3.469669 | -1.344783 |
| 12               | 6                | 0              | -3.337170               | 2.154018  | -0.174883 |
| 13               | 6                | 0              | -4.658099               | 1.915607  | 0.087261  |
| 14               | 1                | 0              | -2.989304               | 3.180958  | -0.159955 |
| 15               | 1                | 0              | -5.358772               | 2.713358  | 0.293595  |
| 16               | 6                | 0              | -6.585437               | 0.479431  | 0.513394  |
| 17               | 6                | 0              | -6.751775               | 0.071103  | 1.978257  |
| 18               | 1                | 0              | -7.054361               | -0.240992 | -0.159672 |
| 19               | 1                | 0              | -7.072722               | 1.438723  | 0.331573  |

|    |    |   |           |           |           |
|----|----|---|-----------|-----------|-----------|
| 20 | 1  | 0 | -7.816776 | -0.022498 | 2.208832  |
| 21 | 1  | 0 | -6.270868 | -0.887300 | 2.189322  |
| 22 | 1  | 0 | -6.320834 | 0.827010  | 2.640457  |
| 23 | 7  | 0 | -5.172009 | 0.644460  | 0.120373  |
| 24 | 6  | 0 | -1.036628 | 1.455884  | -0.440252 |
| 25 | 6  | 0 | 0.119251  | 0.694632  | -0.257142 |
| 26 | 1  | 0 | -0.867385 | 2.526509  | -0.556888 |
| 27 | 1  | 0 | 0.052881  | -0.361097 | -0.022488 |
| 28 | 6  | 0 | 1.389079  | 1.301095  | -0.319499 |
| 29 | 1  | 0 | 1.427129  | 2.366617  | -0.525530 |
| 30 | 6  | 0 | 2.608081  | 0.647329  | -0.134434 |
| 31 | 6  | 0 | 4.496901  | -0.931093 | 0.311468  |
| 32 | 6  | 0 | 4.911145  | 0.397899  | 0.076018  |
| 33 | 6  | 0 | 5.415791  | -1.943525 | 0.582155  |
| 34 | 6  | 0 | 6.275685  | 0.722555  | 0.123366  |
| 35 | 6  | 0 | 6.768305  | -1.612616 | 0.620566  |
| 36 | 1  | 0 | 5.082980  | -2.960156 | 0.759374  |
| 37 | 6  | 0 | 7.187251  | -0.291376 | 0.394428  |
| 38 | 1  | 0 | 6.621714  | 1.735726  | -0.039071 |
| 39 | 1  | 0 | 7.502255  | -2.383196 | 0.829938  |
| 40 | 1  | 0 | 8.244340  | -0.050943 | 0.433545  |
| 41 | 7  | 0 | 3.844943  | 1.249904  | -0.183694 |
| 42 | 16 | 0 | 2.749430  | -1.072358 | 0.212398  |
| 43 | 6  | 0 | 3.992035  | 2.678655  | -0.471064 |
| 44 | 1  | 0 | 3.435291  | 2.931267  | -1.374937 |
| 45 | 1  | 0 | 3.625924  | 3.275436  | 0.368126  |
| 46 | 1  | 0 | 5.040649  | 2.905252  | -0.641380 |

-----

002cbb\_mol\_b3lyp631dp\_PCMw\_TRIPLET\_SCAN\_2.log

Standard orientation:

| Center<br>Number | Atomic<br>Number | Atomic<br>Type | Coordinates (Angstroms) |           |           |
|------------------|------------------|----------------|-------------------------|-----------|-----------|
|                  |                  |                | X                       | Y         | Z         |
| 1                | 6                | 0              | 4.237615                | 2.962941  | -0.093762 |
| 2                | 6                | 0              | 4.909419                | 1.749899  | -0.159121 |
| 3                | 6                | 0              | 4.199241                | 0.535341  | -0.174951 |
| 4                | 6                | 0              | 2.766288                | 0.536272  | -0.115319 |
| 5                | 6                | 0              | 2.127808                | 1.794229  | -0.048050 |
| 6                | 6                | 0              | 2.840062                | 2.984122  | -0.038831 |
| 7                | 1                | 0              | 4.804144                | 3.887979  | -0.083305 |
| 8                | 1                | 0              | 5.990122                | 1.753413  | -0.193917 |
| 9                | 6                | 0              | 2.041082                | -0.728949 | -0.123581 |
| 10               | 1                | 0              | 1.047367                | 1.845407  | -0.000217 |
| 11               | 1                | 0              | 2.308329                | 3.928541  | 0.013692  |
| 12               | 6                | 0              | 2.826879                | -1.912769 | -0.190547 |
| 13               | 6                | 0              | 4.191425                | -1.864949 | -0.252057 |
| 14               | 1                | 0              | 2.363705                | -2.890197 | -0.205977 |
| 15               | 1                | 0              | 4.792788                | -2.762592 | -0.309217 |
| 16               | 6                | 0              | 6.359315                | -0.750662 | -0.280325 |
| 17               | 6                | 0              | 6.988032                | -0.635756 | 1.109604  |
| 18               | 1                | 0              | 6.727730                | 0.024652  | -0.954303 |
| 19               | 1                | 0              | 6.619659                | -1.707942 | -0.734961 |
| 20               | 1                | 0              | 8.075862                | -0.703510 | 1.019775  |
| 21               | 1                | 0              | 6.742763                | 0.314955  | 1.589242  |
| 22               | 1                | 0              | 6.644852                | -1.447651 | 1.756696  |
| 23               | 7                | 0              | 4.883563                | -0.685555 | -0.253142 |
| 24               | 6                | 0              | 0.620401                | -0.788683 | -0.072708 |
| 25               | 6                | 0              | -0.167956               | -1.943322 | -0.051220 |
| 26               | 1                | 0              | 0.107572                | 0.164535  | -0.050019 |
| 27               | 1                | 0              | 0.328154                | -2.907163 | -0.061703 |
| 28               | 6                | 0              | -1.575755               | -2.034751 | -0.019598 |
| 29               | 1                | 0              | -1.948868               | -3.053253 | -0.011198 |
| 30               | 6                | 0              | -2.582328               | -1.061909 | 0.003283  |
| 31               | 6                | 0              | -4.085325               | 0.949255  | 0.032729  |

|    |    |   |           |           |           |
|----|----|---|-----------|-----------|-----------|
| 32 | 6  | 0 | -4.781073 | -0.277956 | 0.047621  |
| 33 | 6  | 0 | -4.755029 | 2.170961  | 0.045600  |
| 34 | 6  | 0 | -6.185145 | -0.279836 | 0.075565  |
| 35 | 6  | 0 | -6.147776 | 2.157778  | 0.073676  |
| 36 | 1  | 0 | -4.203968 | 3.104662  | 0.033941  |
| 37 | 6  | 0 | -6.849044 | 0.941310  | 0.088258  |
| 38 | 1  | 0 | -6.750421 | -1.203130 | 0.086914  |
| 39 | 1  | 0 | -6.692377 | 3.095646  | 0.084162  |
| 40 | 1  | 0 | -7.933603 | 0.948898  | 0.109809  |
| 41 | 7  | 0 | -3.929678 | -1.374393 | 0.031676  |
| 42 | 16 | 0 | -2.350937 | 0.682421  | -0.002614 |
| 43 | 6  | 0 | -4.398119 | -2.762233 | 0.039785  |
| 44 | 1  | 0 | -4.064921 | -3.276452 | -0.864434 |
| 45 | 1  | 0 | -4.017945 | -3.281727 | 0.922035  |
| 46 | 1  | 0 | -5.483245 | -2.776188 | 0.068774  |

-----  
002daa\_mol\_b3lyp631dp\_+1H2\_OL\_PCMw.log

Standard orientation:

| Center<br>Number | Atomic<br>Number | Atomic<br>Type | Coordinates (Angstroms) |           |           |
|------------------|------------------|----------------|-------------------------|-----------|-----------|
|                  |                  |                | X                       | Y         | Z         |
| 1                | 6                | 0              | 5.184459                | 2.300232  | -1.361824 |
| 2                | 6                | 0              | 5.452383                | 0.988466  | -1.030813 |
| 3                | 6                | 0              | 4.447318                | 0.194583  | -0.434543 |
| 4                | 6                | 0              | 3.155217                | 0.750285  | -0.171696 |
| 5                | 6                | 0              | 2.927170                | 2.105267  | -0.531083 |
| 6                | 6                | 0              | 3.916663                | 2.864886  | -1.112170 |
| 7                | 1                | 0              | 5.963082                | 2.900924  | -1.819368 |
| 8                | 1                | 0              | 6.434878                | 0.584351  | -1.229327 |
| 9                | 6                | 0              | 2.137725                | -0.056812 | 0.435098  |
| 10               | 1                | 0              | 1.956204                | 2.545129  | -0.343294 |
| 11               | 1                | 0              | 3.723197                | 3.898033  | -1.378808 |
| 12               | 6                | 0              | 2.461117                | -1.367183 | 0.748186  |
| 13               | 6                | 0              | 3.728390                | -1.870444 | 0.471474  |
| 14               | 1                | 0              | 1.746520                | -2.036303 | 1.206649  |
| 15               | 1                | 0              | 3.988509                | -2.894674 | 0.707327  |
| 16               | 6                | 0              | 6.019094                | -1.766013 | -0.324813 |
| 17               | 6                | 0              | 7.025482                | -1.422140 | 0.770527  |
| 18               | 1                | 0              | 6.364181                | -1.466808 | -1.314296 |
| 19               | 1                | 0              | 5.841057                | -2.840596 | -0.361853 |
| 20               | 1                | 0              | 7.969591                | -1.925868 | 0.547331  |
| 21               | 1                | 0              | 7.217087                | -0.348628 | 0.832062  |
| 22               | 1                | 0              | 6.672219                | -1.769215 | 1.744812  |
| 23               | 7                | 0              | 4.686842                | -1.132712 | -0.096764 |
| 24               | 6                | 0              | 0.767394                | 0.514698  | 0.709908  |
| 25               | 6                | 0              | -0.265554               | -0.439800 | 1.342379  |
| 26               | 1                | 0              | 0.886455                | 1.391778  | 1.358941  |
| 27               | 1                | 0              | 0.129118                | -0.816548 | 2.294706  |
| 28               | 6                | 0              | -1.586561               | 0.237722  | 1.586616  |
| 29               | 1                | 0              | -1.637771               | 0.930807  | 2.420001  |
| 30               | 6                | 0              | -2.689397               | 0.056292  | 0.831128  |
| 31               | 6                | 0              | -4.508038               | -0.702888 | -0.783886 |
| 32               | 6                | 0              | -4.943434               | 0.249334  | 0.158508  |
| 33               | 6                | 0              | -5.371857               | -1.243893 | -1.727098 |
| 34               | 6                | 0              | -6.283745               | 0.650383  | 0.156107  |
| 35               | 6                | 0              | -6.709891               | -0.830429 | -1.731290 |
| 36               | 1                | 0              | -5.015579               | -1.975059 | -2.445784 |
| 37               | 6                | 0              | -7.152801               | 0.105676  | -0.795102 |
| 38               | 1                | 0              | -6.656113               | 1.366367  | 0.879592  |
| 39               | 1                | 0              | -7.398315               | -1.243423 | -2.461195 |
| 40               | 1                | 0              | -8.192106               | 0.419508  | -0.795253 |
| 41               | 7                | 0              | -3.926926               | 0.684942  | 1.004368  |
| 42               | 16               | 0              | -2.782944               | -1.059149 | -0.574164 |
| 43               | 6                | 0              | -4.098374               | 1.674530  | 2.054384  |

|    |   |   |           |           |           |
|----|---|---|-----------|-----------|-----------|
| 44 | 1 | 0 | -4.072856 | 1.211889  | 3.047895  |
| 45 | 1 | 0 | -3.299162 | 2.419468  | 1.994480  |
| 46 | 1 | 0 | -5.050342 | 2.185951  | 1.926754  |
| 47 | 1 | 0 | 0.360630  | 0.901797  | -0.232491 |
| 48 | 1 | 0 | -0.399356 | -1.314610 | 0.694534  |

002dab\_mol\_TDb3lyp631dp\_+1H2\_OL\_PCMw\_opt.log

Standard orientation:

| Center<br>Number | Atomic<br>Number | Atomic<br>Type | Coordinates (Angstroms) |           |           |
|------------------|------------------|----------------|-------------------------|-----------|-----------|
|                  |                  |                | X                       | Y         | Z         |
| 1                | 6                | 0              | 5.392786                | 2.299462  | -1.247650 |
| 2                | 6                | 0              | 5.595840                | 0.957211  | -0.905191 |
| 3                | 6                | 0              | 4.543929                | 0.173018  | -0.410948 |
| 4                | 6                | 0              | 3.241664                | 0.753226  | -0.233972 |
| 5                | 6                | 0              | 3.080443                | 2.110646  | -0.593996 |
| 6                | 6                | 0              | 4.135098                | 2.874516  | -1.094365 |
| 7                | 1                | 0              | 6.225099                | 2.881618  | -1.629620 |
| 8                | 1                | 0              | 6.584331                | 0.534077  | -1.025310 |
| 9                | 6                | 0              | 2.160772                | -0.043909 | 0.292921  |
| 10               | 1                | 0              | 2.107301                | 2.572576  | -0.478176 |
| 11               | 1                | 0              | 3.969452                | 3.914356  | -1.358547 |
| 12               | 6                | 0              | 2.439931                | -1.383174 | 0.613739  |
| 13               | 6                | 0              | 3.686123                | -1.924519 | 0.429972  |
| 14               | 1                | 0              | 1.674979                | -2.036163 | 1.015320  |
| 15               | 1                | 0              | 3.916999                | -2.953280 | 0.666885  |
| 16               | 6                | 0              | 6.043096                | -1.826316 | -0.219350 |
| 17               | 6                | 0              | 6.973482                | -1.557212 | 0.965912  |
| 18               | 1                | 0              | 6.500838                | -1.508984 | -1.159773 |
| 19               | 1                | 0              | 5.858977                | -2.899016 | -0.313432 |
| 20               | 1                | 0              | 7.928483                | -2.068820 | 0.813369  |
| 21               | 1                | 0              | 7.173582                | -0.489119 | 1.085741  |
| 22               | 1                | 0              | 6.529572                | -1.928312 | 1.894418  |
| 23               | 7                | 0              | 4.731652                | -1.179491 | -0.090021 |
| 24               | 6                | 0              | 0.804614                | 0.589128  | 0.479453  |
| 25               | 6                | 0              | -0.269674               | -0.339146 | 1.087964  |
| 26               | 1                | 0              | 0.893829                | 1.481695  | 1.116604  |
| 27               | 1                | 0              | 0.083165                | -0.709621 | 2.060060  |
| 28               | 6                | 0              | -1.549028               | 0.383643  | 1.325812  |
| 29               | 1                | 0              | -1.526043               | 1.210724  | 2.026516  |
| 30               | 6                | 0              | -2.748666               | 0.093341  | 0.714986  |
| 31               | 6                | 0              | -4.634025               | -0.786269 | -0.654997 |
| 32               | 6                | 0              | -4.993787               | 0.300565  | 0.176296  |
| 33               | 6                | 0              | -5.566404               | -1.401068 | -1.494266 |
| 34               | 6                | 0              | -6.311493               | 0.788143  | 0.166966  |
| 35               | 6                | 0              | -6.864841               | -0.911443 | -1.492908 |
| 36               | 1                | 0              | -5.279510               | -2.233685 | -2.125524 |
| 37               | 6                | 0              | -7.228884               | 0.173305  | -0.669028 |
| 38               | 1                | 0              | -6.611849               | 1.621564  | 0.788326  |
| 39               | 1                | 0              | -7.609107               | -1.368742 | -2.134940 |
| 40               | 1                | 0              | -8.249879               | 0.537305  | -0.689142 |
| 41               | 7                | 0              | -3.928074               | 0.762864  | 0.930854  |
| 42               | 16               | 0              | -2.949225               | -1.193394 | -0.465090 |
| 43               | 6                | 0              | -4.013489               | 1.882176  | 1.878202  |
| 44               | 1                | 0              | -3.638452               | 1.565215  | 2.851616  |
| 45               | 1                | 0              | -3.431095               | 2.727089  | 1.506797  |
| 46               | 1                | 0              | -5.050998               | 2.181741  | 1.986489  |
| 47               | 1                | 0              | 0.427647                | 0.960807  | -0.484173 |
| 48               | 1                | 0              | -0.419707               | -1.214274 | 0.448800  |

002dac\_mol\_b3lyp631dp\_+1H2\_OL\_PCMw\_triplet.log

Standard orientation:

| Center<br>Number | Atomic<br>Number | Atomic<br>Type | Coordinates (Angstroms) |           |           |
|------------------|------------------|----------------|-------------------------|-----------|-----------|
|                  |                  |                | X                       | Y         | Z         |
| 1                | 6                | 0              | 5.529068                | 2.248788  | -1.187761 |
| 2                | 6                | 0              | 5.688189                | 0.899082  | -0.849212 |
| 3                | 6                | 0              | 4.604130                | 0.139191  | -0.386482 |
| 4                | 6                | 0              | 3.312938                | 0.754490  | -0.239270 |
| 5                | 6                | 0              | 3.197604                | 2.118322  | -0.590977 |
| 6                | 6                | 0              | 4.284228                | 2.857556  | -1.060516 |
| 7                | 1                | 0              | 6.386354                | 2.810796  | -1.545342 |
| 8                | 1                | 0              | 6.668364                | 0.450915  | -0.947725 |
| 9                | 6                | 0              | 2.196612                | -0.016807 | 0.255809  |
| 10               | 1                | 0              | 2.234675                | 2.606347  | -0.492892 |
| 11               | 1                | 0              | 4.153322                | 3.903832  | -1.320173 |
| 12               | 6                | 0              | 2.431223                | -1.365845 | 0.575055  |
| 13               | 6                | 0              | 3.667935                | -1.939552 | 0.419923  |
| 14               | 1                | 0              | 1.636745                | -1.999840 | 0.951369  |
| 15               | 1                | 0              | 3.865383                | -2.976727 | 0.654984  |
| 16               | 6                | 0              | 6.046375                | -1.896492 | -0.159813 |
| 17               | 6                | 0              | 6.949740                | -1.652750 | 1.052353  |
| 18               | 1                | 0              | 6.540120                | -1.589313 | -1.085763 |
| 19               | 1                | 0              | 5.839465                | -2.964654 | -0.261466 |
| 20               | 1                | 0              | 7.895870                | -2.187684 | 0.925037  |
| 21               | 1                | 0              | 7.172982                | -0.590168 | 1.180215  |
| 22               | 1                | 0              | 6.471187                | -2.014603 | 1.967217  |
| 23               | 7                | 0              | 4.748039                | -1.218257 | -0.067603 |
| 24               | 6                | 0              | 0.851243                | 0.651376  | 0.414250  |
| 25               | 6                | 0              | -0.275270               | -0.263667 | 0.942402  |
| 26               | 1                | 0              | 0.940993                | 1.513704  | 1.092098  |
| 27               | 1                | 0              | 0.025277                | -0.674616 | 1.917151  |
| 28               | 6                | 0              | -1.542217               | 0.492877  | 1.148571  |
| 29               | 1                | 0              | -1.494556               | 1.361560  | 1.797699  |
| 30               | 6                | 0              | -2.764960               | 0.172930  | 0.591415  |
| 31               | 6                | 0              | -4.719654               | -0.825237 | -0.587568 |
| 32               | 6                | 0              | -5.037793               | 0.331280  | 0.165132  |
| 33               | 6                | 0              | -5.697076               | -1.515739 | -1.307568 |
| 34               | 6                | 0              | -6.362040               | 0.801922  | 0.209644  |
| 35               | 6                | 0              | -6.999744               | -1.037130 | -1.260641 |
| 36               | 1                | 0              | -5.442569               | -2.398594 | -1.882195 |
| 37               | 6                | 0              | -7.324369               | 0.109286  | -0.506373 |
| 38               | 1                | 0              | -6.634197               | 1.674393  | 0.789507  |
| 39               | 1                | 0              | -7.778861               | -1.554318 | -1.809648 |
| 40               | 1                | 0              | -8.351057               | 0.457401  | -0.482806 |
| 41               | 7                | 0              | -3.930232               | 0.870548  | 0.795092  |
| 42               | 16               | 0              | -3.023347               | -1.208699 | -0.462100 |
| 43               | 6                | 0              | -3.973454               | 2.077041  | 1.632945  |
| 44               | 1                | 0              | -3.870309               | 1.804055  | 2.685175  |
| 45               | 1                | 0              | -3.170174               | 2.752191  | 1.338288  |
| 46               | 1                | 0              | -4.921397               | 2.583708  | 1.479664  |
| 47               | 1                | 0              | 0.526631                | 1.074090  | -0.547638 |
| 48               | 1                | 0              | -0.421603               | -1.114857 | 0.270519  |

002dba\_mol\_b3lyp631dp\_+1H2\_OL2\_PCMw.log

Standard orientation:

| Center<br>Number | Atomic<br>Number | Atomic<br>Type | Coordinates (Angstroms) |          |          |
|------------------|------------------|----------------|-------------------------|----------|----------|
|                  |                  |                | X                       | Y        | Z        |
| 1                | 6                | 0              | 5.648160                | 1.795000 | 1.461715 |
| 2                | 6                | 0              | 5.721847                | 0.649898 | 0.696645 |
| 3                | 6                | 0              | 4.558329                | 0.136069 | 0.081778 |
| 4                | 6                | 0              | 3.299835                | 0.794887 | 0.266739 |
| 5                | 6                | 0              | 3.278327                | 1.979069 | 1.050506 |
| 6                | 6                | 0              | 4.422702                | 2.469188 | 1.636777 |

|    |    |   |           |           |           |
|----|----|---|-----------|-----------|-----------|
| 7  | 1  | 0 | 6.548813  | 2.180318  | 1.927360  |
| 8  | 1  | 0 | 6.676070  | 0.157138  | 0.576419  |
| 9  | 6  | 0 | 2.117744  | 0.260415  | -0.350599 |
| 10 | 1  | 0 | 2.346694  | 2.514490  | 1.177799  |
| 11 | 1  | 0 | 4.383565  | 3.375852  | 2.230238  |
| 12 | 6  | 0 | 2.262535  | -0.884225 | -1.132340 |
| 13 | 6  | 0 | 3.503590  | -1.476447 | -1.297483 |
| 14 | 1  | 0 | 1.409558  | -1.357093 | -1.600639 |
| 15 | 1  | 0 | 3.622387  | -2.369416 | -1.897887 |
| 16 | 6  | 0 | 5.885818  | -1.753639 | -0.911466 |
| 17 | 6  | 0 | 6.199263  | -2.687120 | 0.255838  |
| 18 | 1  | 0 | 6.680246  | -1.028174 | -1.085388 |
| 19 | 1  | 0 | 5.764909  | -2.318609 | -1.835582 |
| 20 | 1  | 0 | 7.133917  | -3.212355 | 0.042442  |
| 21 | 1  | 0 | 6.319535  | -2.143846 | 1.195811  |
| 22 | 1  | 0 | 5.408109  | -3.430489 | 0.382282  |
| 23 | 7  | 0 | 4.613535  | -1.001063 | -0.714795 |
| 24 | 6  | 0 | 0.805352  | 0.875084  | -0.147722 |
| 25 | 6  | 0 | -0.217308 | 0.786921  | -1.017452 |
| 26 | 1  | 0 | 0.661056  | 1.449577  | 0.761501  |
| 27 | 1  | 0 | -0.087301 | 0.253174  | -1.957846 |
| 28 | 6  | 0 | -1.557884 | 1.419054  | -0.800891 |
| 29 | 1  | 0 | -1.713634 | 2.169149  | -1.587902 |
| 30 | 6  | 0 | -2.709643 | 0.400468  | -0.890253 |
| 31 | 6  | 0 | -4.335790 | -0.872398 | 0.667294  |
| 32 | 6  | 0 | -4.935107 | 0.182640  | -0.047690 |
| 33 | 6  | 0 | -5.087462 | -1.755765 | 1.429229  |
| 34 | 6  | 0 | -6.325778 | 0.324476  | -0.009521 |
| 35 | 6  | 0 | -6.480209 | -1.597119 | 1.477014  |
| 36 | 1  | 0 | -4.604555 | -2.562745 | 1.971519  |
| 37 | 6  | 0 | -7.085831 | -0.566946 | 0.759313  |
| 38 | 1  | 0 | -6.818695 | 1.113661  | -0.565799 |
| 39 | 1  | 0 | -7.080461 | -2.284019 | 2.064904  |
| 40 | 1  | 0 | -8.165194 | -0.451005 | 0.784375  |
| 41 | 7  | 0 | -4.030218 | 1.019039  | -0.715474 |
| 42 | 16 | 0 | -2.567467 | -0.855663 | 0.474378  |
| 43 | 6  | 0 | -4.518179 | 1.797153  | -1.850862 |
| 44 | 1  | 0 | -3.726737 | 2.450526  | -2.219770 |
| 45 | 1  | 0 | -4.863230 | 1.159997  | -2.679078 |
| 46 | 1  | 0 | -5.342869 | 2.437911  | -1.532448 |
| 47 | 1  | 0 | -1.604379 | 1.932898  | 0.163100  |
| 48 | 1  | 0 | -2.653410 | -0.132166 | -1.852990 |

-----

002dbb\_mol\_TDb3lyp631dp\_+1H2\_OL2\_PCMw\_opt.log

Standard orientation:

| Center<br>Number | Atomic<br>Number | Atomic<br>Type | Coordinates (Angstroms) |           |           |
|------------------|------------------|----------------|-------------------------|-----------|-----------|
|                  |                  |                | X                       | Y         | Z         |
| 1                | 6                | 0              | 4.905647                | -2.621636 | 1.020641  |
| 2                | 6                | 0              | 5.311632                | -1.420838 | 0.445531  |
| 3                | 6                | 0              | 4.403249                | -0.364324 | 0.258781  |
| 4                | 6                | 0              | 3.033572                | -0.517106 | 0.658300  |
| 5                | 6                | 0              | 2.665610                | -1.759467 | 1.224708  |
| 6                | 6                | 0              | 3.575729                | -2.791646 | 1.410310  |
| 7                | 1                | 0              | 5.627647                | -3.420571 | 1.153804  |
| 8                | 1                | 0              | 6.342875                | -1.314525 | 0.136888  |
| 9                | 6                | 0              | 2.091322                | 0.574847  | 0.463836  |
| 10               | 1                | 0              | 1.636432                | -1.922120 | 1.519756  |
| 11               | 1                | 0              | 3.247031                | -3.727738 | 1.850311  |
| 12               | 6                | 0              | 2.605891                | 1.750719  | -0.150562 |
| 13               | 6                | 0              | 3.914009                | 1.858391  | -0.514161 |
| 14               | 1                | 0              | 1.967252                | 2.608971  | -0.317060 |
| 15               | 1                | 0              | 4.313116                | 2.756819  | -0.966183 |
| 16               | 6                | 0              | 6.203188                | 1.047168  | -0.780894 |

|    |    |   |           |           |           |
|----|----|---|-----------|-----------|-----------|
| 17 | 6  | 0 | 6.469752  | 0.452670  | -2.165585 |
| 18 | 1  | 0 | 6.889886  | 0.639846  | -0.035259 |
| 19 | 1  | 0 | 6.373206  | 2.125783  | -0.798202 |
| 20 | 1  | 0 | 7.506840  | 0.644930  | -2.455996 |
| 21 | 1  | 0 | 6.306114  | -0.628025 | -2.179809 |
| 22 | 1  | 0 | 5.813716  | 0.908619  | -2.912803 |
| 23 | 7  | 0 | 4.822706  | 0.844281  | -0.314232 |
| 24 | 6  | 0 | 0.713489  | 0.478844  | 0.863727  |
| 25 | 6  | 0 | -0.289167 | 1.355413  | 0.588913  |
| 26 | 1  | 0 | 0.435209  | -0.391104 | 1.452681  |
| 27 | 1  | 0 | -0.104677 | 2.251623  | 0.000857  |
| 28 | 6  | 0 | -1.682149 | 1.205501  | 1.147262  |
| 29 | 1  | 0 | -1.886547 | 1.992076  | 1.889333  |
| 30 | 6  | 0 | -2.748262 | 1.318813  | 0.051964  |
| 31 | 6  | 0 | -4.099035 | -0.637353 | -0.929074 |
| 32 | 6  | 0 | -4.812960 | 0.117697  | 0.059760  |
| 33 | 6  | 0 | -4.687309 | -1.748535 | -1.539665 |
| 34 | 6  | 0 | -6.126772 | -0.262037 | 0.428059  |
| 35 | 6  | 0 | -5.975119 | -2.102437 | -1.168013 |
| 36 | 1  | 0 | -4.145659 | -2.315185 | -2.287387 |
| 37 | 6  | 0 | -6.684545 | -1.361424 | -0.187807 |
| 38 | 1  | 0 | -6.669346 | 0.289893  | 1.184486  |
| 39 | 1  | 0 | -6.449754 | -2.959260 | -1.631637 |
| 40 | 1  | 0 | -7.686902 | -1.671312 | 0.084421  |
| 41 | 7  | 0 | -4.119439 | 1.166207  | 0.547120  |
| 42 | 16 | 0 | -2.517710 | 0.005186  | -1.234609 |
| 43 | 6  | 0 | -4.667117 | 2.139275  | 1.491884  |
| 44 | 1  | 0 | -4.058599 | 3.041869  | 1.464452  |
| 45 | 1  | 0 | -5.687464 | 2.396406  | 1.203302  |
| 46 | 1  | 0 | -4.664248 | 1.733744  | 2.507293  |
| 47 | 1  | 0 | -1.797208 | 0.244202  | 1.657558  |
| 48 | 1  | 0 | -2.672372 | 2.283454  | -0.464753 |

002dbc\_mol\_b3lyp631dp\_+1H2\_OL2\_PCMw\_triplet.log

Standard orientation:

| Center<br>Number | Atomic<br>Number | Atomic<br>Type | Coordinates (Angstroms) |           |           |
|------------------|------------------|----------------|-------------------------|-----------|-----------|
|                  |                  |                | X                       | Y         | Z         |
| 1                | 6                | 0              | 4.781741                | -2.664782 | 0.994458  |
| 2                | 6                | 0              | 5.228842                | -1.467094 | 0.442396  |
| 3                | 6                | 0              | 4.355393                | -0.380191 | 0.263891  |
| 4                | 6                | 0              | 2.976830                | -0.499063 | 0.645233  |
| 5                | 6                | 0              | 2.568468                | -1.735791 | 1.193621  |
| 6                | 6                | 0              | 3.444631                | -2.799429 | 1.371606  |
| 7                | 1                | 0              | 5.478548                | -3.487239 | 1.121222  |
| 8                | 1                | 0              | 6.266248                | -1.386865 | 0.145955  |
| 9                | 6                | 0              | 2.064823                | 0.623527  | 0.452125  |
| 10               | 1                | 0              | 1.533560                | -1.870279 | 1.484075  |
| 11               | 1                | 0              | 3.083436                | -3.730435 | 1.797332  |
| 12               | 6                | 0              | 2.626633                | 1.795779  | -0.134547 |
| 13               | 6                | 0              | 3.941794                | 1.870352  | -0.476341 |
| 14               | 1                | 0              | 2.015173                | 2.673548  | -0.304069 |
| 15               | 1                | 0              | 4.373559                | 2.763184  | -0.910677 |
| 16               | 6                | 0              | 6.210077                | 0.993496  | -0.729419 |
| 17               | 6                | 0              | 6.476981                | 0.414589  | -2.121244 |
| 18               | 1                | 0              | 6.876754                | 0.553283  | 0.016321  |
| 19               | 1                | 0              | 6.413313                | 2.066775  | -0.726886 |
| 20               | 1                | 0              | 7.523435                | 0.579295  | -2.395250 |
| 21               | 1                | 0              | 6.280335                | -0.660149 | -2.156277 |
| 22               | 1                | 0              | 5.845417                | 0.903137  | -2.869009 |
| 23               | 7                | 0              | 4.819648                | 0.825379  | -0.281435 |
| 24               | 6                | 0              | 0.682537                | 0.562980  | 0.829659  |
| 25               | 6                | 0              | -0.278060               | 1.511807  | 0.628178  |
| 26               | 1                | 0              | 0.355054                | -0.335442 | 1.346469  |



|    |    |   |           |           |           |
|----|----|---|-----------|-----------|-----------|
| 27 | 1  | 0 | -0.051435 | 2.441369  | 0.111154  |
| 28 | 6  | 0 | -1.688755 | 1.362705  | 1.117329  |
| 29 | 1  | 0 | -1.974797 | 2.223656  | 1.736497  |
| 30 | 6  | 0 | -2.700997 | 1.307563  | -0.057859 |
| 31 | 6  | 0 | -4.034054 | -0.748109 | -0.834130 |
| 32 | 6  | 0 | -4.786189 | 0.142109  | 0.000842  |
| 33 | 6  | 0 | -4.610893 | -1.923476 | -1.321200 |
| 34 | 6  | 0 | -6.124762 | -0.167395 | 0.347883  |
| 35 | 6  | 0 | -5.925206 | -2.206687 | -0.975914 |
| 36 | 1  | 0 | -4.042379 | -2.595378 | -1.953495 |
| 37 | 6  | 0 | -6.671861 | -1.332216 | -0.144868 |
| 38 | 1  | 0 | -6.696859 | 0.491001  | 0.989230  |
| 39 | 1  | 0 | -6.391010 | -3.113583 | -1.345312 |
| 40 | 1  | 0 | -7.694302 | -1.589021 | 0.108971  |
| 41 | 7  | 0 | -4.097487 | 1.241505  | 0.372600  |
| 42 | 16 | 0 | -2.417637 | -0.180348 | -1.114412 |
| 43 | 6  | 0 | -4.665058 | 2.337023  | 1.159626  |
| 44 | 1  | 0 | -4.063281 | 3.232093  | 1.008423  |
| 45 | 1  | 0 | -5.682894 | 2.538231  | 0.823566  |
| 46 | 1  | 0 | -4.674103 | 2.080109  | 2.223021  |
| 47 | 1  | 0 | -1.809195 | 0.461938  | 1.726498  |
| 48 | 1  | 0 | -2.575006 | 2.191974  | -0.693270 |

-----  
002dca\_mol\_b3lyp631dp\_+1H2\_OL3\_PCMw.log

Standard orientation:

| Center<br>Number | Atomic<br>Number | Atomic<br>Type | Coordinates (Angstroms) |           |           |
|------------------|------------------|----------------|-------------------------|-----------|-----------|
|                  |                  |                | X                       | Y         | Z         |
| 1                | 6                | 0              | 6.262729                | 1.309013  | 0.700892  |
| 2                | 6                | 0              | 5.785265                | 0.100305  | 0.201964  |
| 3                | 6                | 0              | 4.454194                | -0.020954 | -0.247098 |
| 4                | 6                | 0              | 3.592956                | 1.101292  | -0.146094 |
| 5                | 6                | 0              | 4.109745                | 2.307099  | 0.338066  |
| 6                | 6                | 0              | 5.432580                | 2.429560  | 0.760223  |
| 7                | 1                | 0              | 7.293735                | 1.371552  | 1.036581  |
| 8                | 1                | 0              | 6.456910                | -0.747627 | 0.158254  |
| 9                | 6                | 0              | 2.116919                | 1.005443  | -0.500713 |
| 10               | 1                | 0              | 3.446836                | 3.167762  | 0.393117  |
| 11               | 1                | 0              | 5.804381                | 3.377006  | 1.136961  |
| 12               | 6                | 0              | 1.871151                | -0.180172 | -1.389232 |
| 13               | 6                | 0              | 2.744822                | -1.196993 | -1.458403 |
| 14               | 1                | 0              | 0.942776                | -0.247723 | -1.945101 |
| 15               | 1                | 0              | 2.537329                | -2.082601 | -2.049668 |
| 16               | 6                | 0              | 4.804451                | -2.419340 | -0.885578 |
| 17               | 6                | 0              | 4.840256                | -3.197623 | 0.432671  |
| 18               | 1                | 0              | 5.818007                | -2.160011 | -1.209139 |
| 19               | 1                | 0              | 4.385854                | -3.050058 | -1.673523 |
| 20               | 1                | 0              | 5.463530                | -4.090799 | 0.323195  |
| 21               | 1                | 0              | 5.253532                | -2.593359 | 1.245076  |
| 22               | 1                | 0              | 3.833216                | -3.513719 | 0.720705  |
| 23               | 7                | 0              | 3.984293                | -1.206150 | -0.828315 |
| 24               | 6                | 0              | 1.248299                | 0.930391  | 0.823274  |
| 25               | 6                | 0              | -0.209919               | 1.025047  | 0.554579  |
| 26               | 1                | 0              | 1.491312                | 0.004056  | 1.351777  |
| 27               | 1                | 0              | -0.563257               | 1.985787  | 0.179586  |
| 28               | 6                | 0              | -1.083030               | 0.005576  | 0.713002  |
| 29               | 1                | 0              | -0.718162               | -0.943642 | 1.087340  |
| 30               | 6                | 0              | -2.487318               | 0.096827  | 0.409060  |
| 31               | 6                | 0              | -4.780232               | 0.714249  | -0.345799 |
| 32               | 6                | 0              | -4.703502               | -0.540840 | 0.276383  |
| 33               | 6                | 0              | -5.990902               | 1.212456  | -0.828323 |
| 34               | 6                | 0              | -5.843282               | -1.338530 | 0.425350  |
| 35               | 6                | 0              | -7.123859               | 0.418778  | -0.675642 |
| 36               | 1                | 0              | -6.044937               | 2.183241  | -1.307272 |

|    |    |   |           |           |           |
|----|----|---|-----------|-----------|-----------|
| 37 | 6  | 0 | -7.048357 | -0.840655 | -0.057785 |
| 38 | 1  | 0 | -5.795759 | -2.313336 | 0.894662  |
| 39 | 1  | 0 | -8.078710 | 0.779614  | -1.042259 |
| 40 | 1  | 0 | -7.945980 | -1.440387 | 0.045097  |
| 41 | 7  | 0 | -3.399218 | -0.844864 | 0.695062  |
| 42 | 16 | 0 | -3.195573 | 1.460969  | -0.406449 |
| 43 | 6  | 0 | -3.117060 | -2.112120 | 1.389510  |
| 44 | 1  | 0 | -3.128700 | -2.933465 | 0.670576  |
| 45 | 1  | 0 | -2.151834 | -2.063813 | 1.882496  |
| 46 | 1  | 0 | -3.884598 | -2.268037 | 2.147083  |
| 47 | 1  | 0 | 1.816750  | 1.932724  | -1.007173 |
| 48 | 1  | 0 | 1.545977  | 1.775574  | 1.455744  |

002dcb\_mol\_TDb3lyp631dp\_+1H2\_OL3\_PCMw\_opt.log

Standard orientation:

| Center Number | Atomic Number | Atomic Type | Coordinates (Angstroms) |           |           |
|---------------|---------------|-------------|-------------------------|-----------|-----------|
|               |               |             | X                       | Y         | Z         |
| 1             | 6             | 0           | 6.258924                | -1.149597 | -1.051496 |
| 2             | 6             | 0           | 5.829422                | -0.018453 | -0.373179 |
| 3             | 6             | 0           | 4.542630                | 0.013320  | 0.197618  |
| 4             | 6             | 0           | 3.676741                | -1.100925 | 0.069685  |
| 5             | 6             | 0           | 4.144516                | -2.229875 | -0.604599 |
| 6             | 6             | 0           | 5.420619                | -2.263319 | -1.162401 |
| 7             | 1             | 0           | 7.252382                | -1.165401 | -1.485275 |
| 8             | 1             | 0           | 6.498579                | 0.825836  | -0.286304 |
| 9             | 6             | 0           | 2.266823                | -1.068857 | 0.611024  |
| 10            | 1             | 0           | 3.497126                | -3.096579 | -0.689534 |
| 11            | 1             | 0           | 5.761433                | -3.153431 | -1.679831 |
| 12            | 6             | 0           | 2.031885                | 0.100943  | 1.500376  |
| 13            | 6             | 0           | 2.917473                | 1.137145  | 1.582451  |
| 14            | 1             | 0           | 1.118767                | 0.156386  | 2.075665  |
| 15            | 1             | 0           | 2.709087                | 2.014862  | 2.179217  |
| 16            | 6             | 0           | 4.937544                | 2.366569  | 1.013111  |
| 17            | 6             | 0           | 4.817978                | 3.232471  | -0.242493 |
| 18            | 1             | 0           | 5.968417                | 2.071954  | 1.208882  |
| 19            | 1             | 0           | 4.590900                | 2.914398  | 1.888824  |
| 20            | 1             | 0           | 5.432079                | 4.126462  | -0.108992 |
| 21            | 1             | 0           | 5.164832                | 2.707102  | -1.135026 |
| 22            | 1             | 0           | 3.782520                | 3.544097  | -0.400360 |
| 23            | 7             | 0           | 4.110336                | 1.139462  | 0.928881  |
| 24            | 6             | 0           | 1.211900                | -1.073376 | -0.543610 |
| 25            | 6             | 0           | -0.203212               | -0.968147 | -0.042143 |
| 26            | 1             | 0           | 1.437177                | -0.239108 | -1.216805 |
| 27            | 1             | 0           | -0.473636               | -1.590895 | 0.808332  |
| 28            | 6             | 0           | -1.173110               | -0.235312 | -0.694010 |
| 29            | 1             | 0           | -0.864042               | 0.366643  | -1.544808 |
| 30            | 6             | 0           | -2.530798               | -0.185320 | -0.361659 |
| 31            | 6             | 0           | -4.856982               | -0.475119 | 0.571198  |
| 32            | 6             | 0           | -4.783518               | 0.446956  | -0.490999 |
| 33            | 6             | 0           | -6.062062               | -0.768462 | 1.199299  |
| 34            | 6             | 0           | -5.952092               | 1.075104  | -0.940132 |
| 35            | 6             | 0           | -7.223720               | -0.130286 | 0.752931  |
| 36            | 1             | 0           | -6.098662               | -1.480028 | 2.017558  |
| 37            | 6             | 0           | -7.161008               | 0.778645  | -0.307262 |
| 38            | 1             | 0           | -5.932132               | 1.774431  | -1.767474 |
| 39            | 1             | 0           | -8.173317               | -0.347282 | 1.230365  |
| 40            | 1             | 0           | -8.067099               | 1.265161  | -0.654157 |
| 41            | 7             | 0           | -3.487891               | 0.615479  | -0.972547 |
| 42            | 16            | 0           | -3.260016               | -1.148613 | 0.936544  |
| 43            | 6             | 0           | -3.132845               | 1.526531  | -2.052746 |
| 44            | 1             | 0           | -2.252225               | 2.108647  | -1.771285 |
| 45            | 1             | 0           | -2.920771               | 0.981263  | -2.978030 |
| 46            | 1             | 0           | -3.952844               | 2.219020  | -2.229001 |

|    |   |   |          |           |           |
|----|---|---|----------|-----------|-----------|
| 47 | 1 | 0 | 2.095327 | -1.981394 | 1.202568  |
| 48 | 1 | 0 | 1.366601 | -1.992732 | -1.129342 |

002dcc\_mol\_b3lyp631dp\_+1H2\_OL3\_PCMw\_triplet.log

Standard orientation:

| Center<br>Number | Atomic<br>Number | Atomic<br>Type | Coordinates (Angstroms) |           |           |
|------------------|------------------|----------------|-------------------------|-----------|-----------|
|                  |                  |                | X                       | Y         | Z         |
| 1                | 6                | 0              | 6.289604                | -1.389128 | -0.704842 |
| 2                | 6                | 0              | 5.880445                | -0.173077 | -0.185012 |
| 3                | 6                | 0              | 4.546571                | -0.002686 | 0.247990  |
| 4                | 6                | 0              | 3.614748                | -1.071019 | 0.130680  |
| 5                | 6                | 0              | 4.068567                | -2.289188 | -0.380354 |
| 6                | 6                | 0              | 5.386904                | -2.457055 | -0.795240 |
| 7                | 1                | 0              | 7.315890                | -1.510610 | -1.033089 |
| 8                | 1                | 0              | 6.595599                | 0.634202  | -0.112925 |
| 9                | 6                | 0              | 2.169863                | -0.905782 | 0.524667  |
| 10               | 1                | 0              | 3.374903                | -3.120917 | -0.449965 |
| 11               | 1                | 0              | 5.712880                | -3.414104 | -1.188199 |
| 12               | 6                | 0              | 1.914792                | 0.384623  | 1.202471  |
| 13               | 6                | 0              | 2.860088                | 1.360580  | 1.299000  |
| 14               | 1                | 0              | 0.920875                | 0.583759  | 1.585279  |
| 15               | 1                | 0              | 2.649179                | 2.317625  | 1.758007  |
| 16               | 6                | 0              | 5.044446                | 2.370967  | 0.921114  |
| 17               | 6                | 0              | 5.125420                | 3.152797  | -0.391697 |
| 18               | 1                | 0              | 6.022334                | 2.014505  | 1.244841  |
| 19               | 1                | 0              | 4.653778                | 3.002125  | 1.719296  |
| 20               | 1                | 0              | 5.794366                | 4.005330  | -0.248676 |
| 21               | 1                | 0              | 5.517784                | 2.540087  | -1.206424 |
| 22               | 1                | 0              | 4.141177                | 3.530025  | -0.680082 |
| 23               | 7                | 0              | 4.132822                | 1.204067  | 0.824311  |
| 24               | 6                | 0              | 1.187431                | -1.057915 | -0.722438 |
| 25               | 6                | 0              | -0.255043               | -1.124697 | -0.339021 |
| 26               | 1                | 0              | 1.376792                | -0.224594 | -1.406533 |
| 27               | 1                | 0              | -0.568057               | -1.996600 | 0.233288  |
| 28               | 6                | 0              | -1.181142               | -0.157084 | -0.690351 |
| 29               | 1                | 0              | -0.822964               | 0.699203  | -1.257162 |
| 30               | 6                | 0              | -2.545956               | -0.175863 | -0.393330 |
| 31               | 6                | 0              | -4.898888               | -0.642415 | 0.396238  |
| 32               | 6                | 0              | -4.771275               | 0.563398  | -0.324791 |
| 33               | 6                | 0              | -6.121178               | -1.059573 | 0.909587  |
| 34               | 6                | 0              | -5.903256               | 1.365120  | -0.525382 |
| 35               | 6                | 0              | -7.247105               | -0.255385 | 0.702352  |
| 36               | 1                | 0              | -6.198150               | -1.991260 | 1.460607  |
| 37               | 6                | 0              | -7.129701               | 0.942875  | -0.008058 |
| 38               | 1                | 0              | -5.841059               | 2.300205  | -1.069382 |
| 39               | 1                | 0              | -8.209357               | -0.565261 | 1.096173  |
| 40               | 1                | 0              | -8.005681               | 1.564651  | -0.164400 |
| 41               | 7                | 0              | -3.471708               | 0.799383  | -0.758276 |
| 42               | 16               | 0              | -3.339965               | -1.473174 | 0.524344  |
| 43               | 6                | 0              | -3.059047               | 1.965993  | -1.526473 |
| 44               | 1                | 0              | -2.350070               | 2.574656  | -0.955980 |
| 45               | 1                | 0              | -2.587559               | 1.656116  | -2.463901 |
| 46               | 1                | 0              | -3.927580               | 2.574916  | -1.764572 |
| 47               | 1                | 0              | 1.888913                | -1.724500 | 1.204828  |
| 48               | 1                | 0              | 1.499938                | -1.975859 | -1.235440 |

002dda\_mol\_b3lyp631dp\_+1H2\_OL4\_PCMw.log

Standard orientation:

| Center<br>Number | Atomic<br>Number | Atomic<br>Type | Coordinates (Angstroms) |   |   |
|------------------|------------------|----------------|-------------------------|---|---|
|                  |                  |                | X                       | Y | Z |

|    |    |   |           |           |           |
|----|----|---|-----------|-----------|-----------|
| 1  | 6  | 0 | 6.173621  | 1.715822  | 0.442880  |
| 2  | 6  | 0 | 5.899787  | 0.380497  | 0.181487  |
| 3  | 6  | 0 | 4.593009  | -0.045927 | -0.135196 |
| 4  | 6  | 0 | 3.532669  | 0.907069  | -0.174842 |
| 5  | 6  | 0 | 3.856340  | 2.249502  | 0.093695  |
| 6  | 6  | 0 | 5.147000  | 2.662438  | 0.397600  |
| 7  | 1  | 0 | 7.189663  | 2.014228  | 0.682404  |
| 8  | 1  | 0 | 6.709846  | -0.335363 | 0.226587  |
| 9  | 6  | 0 | 2.139935  | 0.486802  | -0.493797 |
| 10 | 1  | 0 | 3.071413  | 2.996107  | 0.061428  |
| 11 | 1  | 0 | 5.350492  | 3.709366  | 0.598582  |
| 12 | 6  | 0 | 1.998924  | -0.935943 | -0.752254 |
| 13 | 6  | 0 | 3.050425  | -1.783739 | -0.705318 |
| 14 | 1  | 0 | 1.029427  | -1.355046 | -0.989907 |
| 15 | 1  | 0 | 2.928547  | -2.843048 | -0.899819 |
| 16 | 6  | 0 | 5.382259  | -2.424872 | -0.330795 |
| 17 | 6  | 0 | 5.659073  | -2.902994 | 1.096869  |
| 18 | 1  | 0 | 6.293291  | -2.048729 | -0.803354 |
| 19 | 1  | 0 | 5.045926  | -3.263668 | -0.944678 |
| 20 | 1  | 0 | 6.435679  | -3.673963 | 1.085658  |
| 21 | 1  | 0 | 6.000173  | -2.085621 | 1.737796  |
| 22 | 1  | 0 | 4.756264  | -3.332138 | 1.541436  |
| 23 | 7  | 0 | 4.338856  | -1.393118 | -0.416870 |
| 24 | 6  | 0 | 1.090422  | 1.354242  | -0.543212 |
| 25 | 6  | 0 | -0.333349 | 0.986616  | -0.865322 |
| 26 | 1  | 0 | 1.247304  | 2.403553  | -0.317600 |
| 27 | 1  | 0 | -0.380091 | 0.105481  | -1.514404 |
| 28 | 6  | 0 | -1.167734 | 0.719703  | 0.409959  |
| 29 | 1  | 0 | -1.118245 | 1.596450  | 1.067152  |
| 30 | 6  | 0 | -2.611030 | 0.400208  | 0.165542  |
| 31 | 6  | 0 | -4.863533 | -0.091841 | -0.753064 |
| 32 | 6  | 0 | -4.801720 | -0.119103 | 0.647517  |
| 33 | 6  | 0 | -6.057622 | -0.347715 | -1.430516 |
| 34 | 6  | 0 | -5.935177 | -0.404597 | 1.415729  |
| 35 | 6  | 0 | -7.184233 | -0.631055 | -0.665957 |
| 36 | 1  | 0 | -6.101933 | -0.326202 | -2.513164 |
| 37 | 6  | 0 | -7.121948 | -0.658753 | 0.738490  |
| 38 | 1  | 0 | -5.894586 | -0.428453 | 2.497827  |
| 39 | 1  | 0 | -8.126393 | -0.834230 | -1.163316 |
| 40 | 1  | 0 | -8.017075 | -0.883189 | 1.308071  |
| 41 | 7  | 0 | -3.509944 | 0.166144  | 1.118933  |
| 42 | 16 | 0 | -3.287429 | 0.291912  | -1.417328 |
| 43 | 6  | 0 | -3.220554 | 0.188028  | 2.562262  |
| 44 | 1  | 0 | -3.409051 | -0.803466 | 2.976566  |
| 45 | 1  | 0 | -2.182648 | 0.459450  | 2.726950  |
| 46 | 1  | 0 | -3.869076 | 0.923274  | 3.040384  |
| 47 | 1  | 0 | -0.798559 | 1.811200  | -1.419530 |
| 48 | 1  | 0 | -0.723279 | -0.114082 | 0.967178  |

002ddb\_mol\_TDb3lyp631dp\_+1H2\_OL4\_PCMw\_opt.log

Standard orientation:

| Center Number | Atomic Number | Atomic Type | Coordinates (Angstroms) |           |           |
|---------------|---------------|-------------|-------------------------|-----------|-----------|
|               |               |             | X                       | Y         | Z         |
| 1             | 6             | 0           | -6.135369               | -1.715907 | 0.410578  |
| 2             | 6             | 0           | -5.865043               | -0.364123 | 0.340927  |
| 3             | 6             | 0           | -4.572852               | 0.083344  | -0.008467 |
| 4             | 6             | 0           | -3.536519               | -0.858596 | -0.282026 |
| 5             | 6             | 0           | -3.860544               | -2.231145 | -0.206058 |
| 6             | 6             | 0           | -5.129268               | -2.656728 | 0.132986  |
| 7             | 1             | 0           | -7.132541               | -2.046951 | 0.678792  |
| 8             | 1             | 0           | -6.654037               | 0.341363  | 0.558221  |
| 9             | 6             | 0           | -2.197730               | -0.383226 | -0.633374 |

|    |    |   |           |           |           |
|----|----|---|-----------|-----------|-----------|
| 10 | 1  | 0 | -3.105071 | -2.974709 | -0.423668 |
| 11 | 1  | 0 | -5.347892 | -3.717571 | 0.182543  |
| 12 | 6  | 0 | -2.028359 | 1.022463  | -0.709035 |
| 13 | 6  | 0 | -3.068739 | 1.880992  | -0.437788 |
| 14 | 1  | 0 | -1.074974 | 1.458503  | -0.968209 |
| 15 | 1  | 0 | -2.936434 | 2.953562  | -0.485943 |
| 16 | 6  | 0 | -5.327875 | 2.476146  | 0.226117  |
| 17 | 6  | 0 | -5.470541 | 2.709537  | 1.729303  |
| 18 | 1  | 0 | -6.266692 | 2.169165  | -0.234349 |
| 19 | 1  | 0 | -5.014260 | 3.391444  | -0.275663 |
| 20 | 1  | 0 | -6.228073 | 3.479847  | 1.894963  |
| 21 | 1  | 0 | -5.780879 | 1.804951  | 2.257154  |
| 22 | 1  | 0 | -4.526870 | 3.056159  | 2.158378  |
| 23 | 7  | 0 | -4.298950 | 1.451706  | -0.095630 |
| 24 | 6  | 0 | -1.128912 | -1.251628 | -0.861880 |
| 25 | 6  | 0 | 0.263088  | -0.873619 | -1.231153 |
| 26 | 1  | 0 | -1.293391 | -2.313853 | -0.726557 |
| 27 | 1  | 0 | 0.313057  | 0.128779  | -1.663631 |
| 28 | 6  | 0 | 1.231077  | -0.973183 | -0.020001 |
| 29 | 1  | 0 | 1.166100  | -1.982322 | 0.398148  |
| 30 | 6  | 0 | 2.652316  | -0.682486 | -0.405622 |
| 31 | 6  | 0 | 4.669644  | 0.869973  | -0.284816 |
| 32 | 6  | 0 | 4.838337  | -0.339893 | 0.416946  |
| 33 | 6  | 0 | 5.688237  | 1.812871  | -0.359147 |
| 34 | 6  | 0 | 6.054531  | -0.601912 | 1.064363  |
| 35 | 6  | 0 | 6.902411  | 1.545254  | 0.285900  |
| 36 | 1  | 0 | 5.544073  | 2.738297  | -0.907043 |
| 37 | 6  | 0 | 7.074946  | 0.349695  | 0.988066  |
| 38 | 1  | 0 | 6.201044  | -1.519418 | 1.622230  |
| 39 | 1  | 0 | 7.707270  | 2.271019  | 0.237941  |
| 40 | 1  | 0 | 8.017403  | 0.150551  | 1.488623  |
| 41 | 7  | 0 | 3.724075  | -1.162547 | 0.369280  |
| 42 | 16 | 0 | 3.054402  | 0.949191  | -1.010061 |
| 43 | 6  | 0 | 3.747642  | -2.509098 | 0.927388  |
| 44 | 1  | 0 | 3.604602  | -2.497703 | 2.012644  |
| 45 | 1  | 0 | 2.961646  | -3.107541 | 0.469796  |
| 46 | 1  | 0 | 4.705307  | -2.985741 | 0.702290  |
| 47 | 1  | 0 | 0.614670  | -1.569726 | -2.001983 |
| 48 | 1  | 0 | 0.876764  | -0.291664 | 0.771521  |

-----  
002ddc\_mol\_b3lyp631dp\_+1H2\_OL4\_PCMw\_triplet.log

Standard orientation:

| Center<br>Number | Atomic<br>Number | Atomic<br>Type | Coordinates (Angstroms) |           |           |
|------------------|------------------|----------------|-------------------------|-----------|-----------|
|                  |                  |                | X                       | Y         | Z         |
| 1                | 6                | 0              | -6.102487               | -1.803221 | 0.421006  |
| 2                | 6                | 0              | -5.884390               | -0.442697 | 0.341658  |
| 3                | 6                | 0              | -4.607864               | 0.052119  | -0.004660 |
| 4                | 6                | 0              | -3.532037               | -0.853478 | -0.266954 |
| 5                | 6                | 0              | -3.805148               | -2.237202 | -0.178376 |
| 6                | 6                | 0              | -5.058735               | -2.707468 | 0.157935  |
| 7                | 1                | 0              | -7.087716               | -2.170394 | 0.686987  |
| 8                | 1                | 0              | -6.701360               | 0.233281  | 0.549722  |
| 9                | 6                | 0              | -2.214090               | -0.329661 | -0.615217 |
| 10               | 1                | 0              | -3.020389               | -2.953911 | -0.381520 |
| 11               | 1                | 0              | -5.236750               | -3.775533 | 0.217628  |
| 12               | 6                | 0              | -2.093234               | 1.078768  | -0.687218 |
| 13               | 6                | 0              | -3.166869               | 1.900602  | -0.428557 |
| 14               | 1                | 0              | -1.152632               | 1.548593  | -0.937630 |
| 15               | 1                | 0              | -3.074764               | 2.977723  | -0.478615 |
| 16               | 6                | 0              | -5.454663               | 2.414471  | 0.204110  |
| 17               | 6                | 0              | -5.615355               | 2.660457  | 1.703657  |
| 18               | 1                | 0              | -6.378079               | 2.065992  | -0.258225 |
| 19               | 1                | 0              | -5.172247               | 3.334749  | -0.307365 |

|    |    |   |           |           |           |
|----|----|---|-----------|-----------|-----------|
| 20 | 1  | 0 | -6.401971 | 3.404366  | 1.854696  |
| 21 | 1  | 0 | -5.895784 | 1.751490  | 2.240634  |
| 22 | 1  | 0 | -4.687996 | 3.047271  | 2.133870  |
| 23 | 7  | 0 | -4.384456 | 1.425601  | -0.098531 |
| 24 | 6  | 0 | -1.113299 | -1.166207 | -0.857826 |
| 25 | 6  | 0 | 0.267958  | -0.748571 | -1.230917 |
| 26 | 1  | 0 | -1.244867 | -2.235984 | -0.736981 |
| 27 | 1  | 0 | 0.307486  | 0.285886  | -1.580977 |
| 28 | 6  | 0 | 1.262204  | -0.945788 | -0.052743 |
| 29 | 1  | 0 | 1.186091  | -1.979406 | 0.299317  |
| 30 | 6  | 0 | 2.686265  | -0.660147 | -0.452401 |
| 31 | 6  | 0 | 4.704713  | 0.894896  | -0.242921 |
| 32 | 6  | 0 | 4.869895  | -0.349677 | 0.401710  |
| 33 | 6  | 0 | 5.723800  | 1.838500  | -0.266540 |
| 34 | 6  | 0 | 6.084588  | -0.644118 | 1.038551  |
| 35 | 6  | 0 | 6.936063  | 1.539163  | 0.371126  |
| 36 | 1  | 0 | 5.583857  | 2.789449  | -0.770572 |
| 37 | 6  | 0 | 7.105935  | 0.310525  | 1.013972  |
| 38 | 1  | 0 | 6.229273  | -1.589840 | 1.548262  |
| 39 | 1  | 0 | 7.741217  | 2.266584  | 0.361814  |
| 40 | 1  | 0 | 8.046956  | 0.086182  | 1.507079  |
| 41 | 7  | 0 | 3.759200  | -1.169575 | 0.310458  |
| 42 | 16 | 0 | 3.096441  | 1.003415  | -0.979796 |
| 43 | 6  | 0 | 3.804793  | -2.551342 | 0.773997  |
| 44 | 1  | 0 | 3.753620  | -2.608752 | 1.866562  |
| 45 | 1  | 0 | 2.969722  | -3.107377 | 0.351438  |
| 46 | 1  | 0 | 4.731690  | -3.028523 | 0.439978  |
| 47 | 1  | 0 | 0.605174  | -1.380593 | -2.062057 |
| 48 | 1  | 0 | 0.944952  | -0.307629 | 0.788863  |

002dea\_mol\_b3lyp631dp\_+1H2\_OL5\_PCMw.log

Standard orientation:

| Center<br>Number | Atomic<br>Number | Atomic<br>Type | Coordinates (Angstroms) |           |           |
|------------------|------------------|----------------|-------------------------|-----------|-----------|
|                  |                  |                | X                       | Y         | Z         |
| 1                | 6                | 0              | 5.950032                | 2.134458  | -0.259774 |
| 2                | 6                | 0              | 5.902460                | 0.753260  | -0.253760 |
| 3                | 6                | 0              | 4.665802                | 0.056470  | -0.214844 |
| 4                | 6                | 0              | 3.449349                | 0.832822  | -0.189154 |
| 5                | 6                | 0              | 3.556234                | 2.247817  | -0.196915 |
| 6                | 6                | 0              | 4.771003                | 2.900045  | -0.228271 |
| 7                | 1                | 0              | 6.917300                | 2.627566  | -0.286508 |
| 8                | 1                | 0              | 6.832679                | 0.201703  | -0.264341 |
| 9                | 6                | 0              | 2.157870                | 0.173311  | -0.230926 |
| 10               | 1                | 0              | 2.649532                | 2.840738  | -0.214887 |
| 11               | 1                | 0              | 4.814305                | 3.983550  | -0.243738 |
| 12               | 6                | 0              | 2.206528                | -1.293417 | -0.586823 |
| 13               | 6                | 0              | 3.365806                | -1.973529 | 0.127402  |
| 14               | 1                | 0              | 1.284050                | -1.816559 | -0.334905 |
| 15               | 1                | 0              | 3.431816                | -3.017155 | -0.188083 |
| 16               | 6                | 0              | 5.841831                | -2.127063 | -0.040628 |
| 17               | 6                | 0              | 6.367402                | -2.208777 | 1.397635  |
| 18               | 1                | 0              | 6.613755                | -1.745549 | -0.713507 |
| 19               | 1                | 0              | 5.595147                | -3.129251 | -0.402138 |
| 20               | 1                | 0              | 7.259690                | -2.841436 | 1.431420  |
| 21               | 1                | 0              | 6.635252                | -1.220690 | 1.782256  |
| 22               | 1                | 0              | 5.619146                | -2.644454 | 2.066392  |
| 23               | 7                | 0              | 4.629658                | -1.315637 | -0.197050 |
| 24               | 6                | 0              | 0.967208                | 0.840617  | -0.005806 |
| 25               | 6                | 0              | -0.322630               | 0.276387  | -0.095116 |
| 26               | 1                | 0              | 1.001939                | 1.889314  | 0.272115  |
| 27               | 1                | 0              | -0.411225               | -0.774752 | -0.356819 |
| 28               | 6                | 0              | -1.480701               | 0.994479  | 0.128168  |
| 29               | 1                | 0              | -1.400199               | 2.045819  | 0.380607  |

|    |    |   |           |           |           |
|----|----|---|-----------|-----------|-----------|
| 30 | 6  | 0 | -2.778549 | 0.445729  | 0.053472  |
| 31 | 6  | 0 | -4.849940 | -0.939398 | -0.162891 |
| 32 | 6  | 0 | -5.099097 | 0.405965  | 0.156468  |
| 33 | 6  | 0 | -5.887016 | -1.857272 | -0.319232 |
| 34 | 6  | 0 | -6.412789 | 0.854704  | 0.331750  |
| 35 | 6  | 0 | -7.192875 | -1.404007 | -0.146793 |
| 36 | 1  | 0 | -5.680654 | -2.892443 | -0.566389 |
| 37 | 6  | 0 | -7.447809 | -0.063112 | 0.175773  |
| 38 | 1  | 0 | -6.633490 | 1.883923  | 0.585369  |
| 39 | 1  | 0 | -8.018579 | -2.097769 | -0.262265 |
| 40 | 1  | 0 | -8.470992 | 0.271345  | 0.308988  |
| 41 | 7  | 0 | -3.915848 | 1.151368  | 0.261149  |
| 42 | 16 | 0 | -3.123375 | -1.232110 | -0.313350 |
| 43 | 6  | 0 | -3.887767 | 2.586504  | 0.573850  |
| 44 | 1  | 0 | -3.418364 | 2.748781  | 1.546115  |
| 45 | 1  | 0 | -3.336526 | 3.121612  | -0.200827 |
| 46 | 1  | 0 | -4.904414 | 2.966446  | 0.601661  |
| 47 | 1  | 0 | 3.193772  | -1.966149 | 1.215270  |
| 48 | 1  | 0 | 2.349277  | -1.386893 | -1.672390 |

002deb\_mol\_TDb3lyp631dp\_+1H2\_OL5\_PCMw\_opt.log

Standard orientation:

| Center<br>Number | Atomic<br>Number | Atomic<br>Type | Coordinates (Angstroms) |           |           |
|------------------|------------------|----------------|-------------------------|-----------|-----------|
|                  |                  |                | X                       | Y         | Z         |
| 1                | 6                | 0              | 5.958836                | 2.186768  | -0.107395 |
| 2                | 6                | 0              | 5.895881                | 0.806303  | 0.064579  |
| 3                | 6                | 0              | 4.674286                | 0.107696  | -0.091481 |
| 4                | 6                | 0              | 3.470495                | 0.845291  | -0.394236 |
| 5                | 6                | 0              | 3.584729                | 2.213402  | -0.596638 |
| 6                | 6                | 0              | 4.808264                | 2.895083  | -0.444455 |
| 7                | 1                | 0              | 6.905425                | 2.699041  | 0.024155  |
| 8                | 1                | 0              | 6.793877                | 0.275715  | 0.350303  |
| 9                | 6                | 0              | 2.181170                | 0.129964  | -0.516655 |
| 10               | 1                | 0              | 2.705248                | 2.774461  | -0.892599 |
| 11               | 1                | 0              | 4.845263                | 3.968782  | -0.593530 |
| 12               | 6                | 0              | 2.315784                | -1.317443 | -0.881435 |
| 13               | 6                | 0              | 3.341185                | -1.967975 | 0.063712  |
| 14               | 1                | 0              | 1.375480                | -1.862152 | -0.784202 |
| 15               | 1                | 0              | 3.525720                | -3.007715 | -0.213181 |
| 16               | 6                | 0              | 5.826178                | -2.084052 | 0.193142  |
| 17               | 6                | 0              | 6.184401                | -2.329765 | 1.665922  |
| 18               | 1                | 0              | 6.653493                | -1.611916 | -0.337773 |
| 19               | 1                | 0              | 5.629627                | -3.036822 | -0.305174 |
| 20               | 1                | 0              | 7.076294                | -2.960419 | 1.715257  |
| 21               | 1                | 0              | 6.393920                | -1.390937 | 2.185205  |
| 22               | 1                | 0              | 5.372715                | -2.842245 | 2.188580  |
| 23               | 7                | 0              | 4.621859                | -1.263063 | 0.025198  |
| 24               | 6                | 0              | 0.997109                | 0.745302  | -0.195096 |
| 25               | 6                | 0              | -0.310162               | 0.194864  | -0.285665 |
| 26               | 1                | 0              | 1.050753                | 1.767016  | 0.177381  |
| 27               | 1                | 0              | -0.428776               | -0.805479 | -0.693225 |
| 28               | 6                | 0              | -1.444595               | 0.896532  | 0.109013  |
| 29               | 1                | 0              | -1.309465               | 1.894824  | 0.514155  |
| 30               | 6                | 0              | -2.755789               | 0.416880  | 0.032892  |
| 31               | 6                | 0              | -4.892687               | -0.874498 | -0.249955 |
| 32               | 6                | 0              | -5.076268               | 0.417947  | 0.281468  |
| 33               | 6                | 0              | -5.966147               | -1.732810 | -0.469318 |
| 34               | 6                | 0              | -6.366353               | 0.856716  | 0.608449  |
| 35               | 6                | 0              | -7.248615               | -1.286420 | -0.146296 |
| 36               | 1                | 0              | -5.807030               | -2.723955 | -0.879965 |
| 37               | 6                | 0              | -7.438918               | -0.005171 | 0.387360  |
| 38               | 1                | 0              | -6.539261               | 1.839698  | 1.029037  |
| 39               | 1                | 0              | -8.099973               | -1.938720 | -0.308535 |

|    |    |   |           |           |           |
|----|----|---|-----------|-----------|-----------|
| 40 | 1  | 0 | -8.440369 | 0.328767  | 0.638333  |
| 41 | 7  | 0 | -3.877850 | 1.115556  | 0.415119  |
| 42 | 16 | 0 | -3.186371 | -1.187574 | -0.560907 |
| 43 | 6  | 0 | -3.781671 | 2.481155  | 0.928582  |
| 44 | 1  | 0 | -3.279671 | 2.491237  | 1.900008  |
| 45 | 1  | 0 | -3.224983 | 3.103759  | 0.224731  |
| 46 | 1  | 0 | -4.778990 | 2.897544  | 1.040440  |
| 47 | 1  | 0 | 2.945079  | -1.958659 | 1.087472  |
| 48 | 1  | 0 | 2.666819  | -1.442706 | -1.913549 |

002dec\_mol\_b3lyp631dp\_+1H2\_OL5\_PCMw\_triplet.log

Standard orientation:

| Center<br>Number | Atomic<br>Number | Atomic<br>Type | Coordinates (Angstroms) |           |           |
|------------------|------------------|----------------|-------------------------|-----------|-----------|
|                  |                  |                | X                       | Y         | Z         |
| 1                | 6                | 0              | 5.889021                | 2.237570  | -0.325303 |
| 2                | 6                | 0              | 5.893862                | 0.860215  | -0.332810 |
| 3                | 6                | 0              | 4.686973                | 0.121458  | -0.194820 |
| 4                | 6                | 0              | 3.414559                | 0.832553  | -0.094608 |
| 5                | 6                | 0              | 3.480885                | 2.253012  | -0.073117 |
| 6                | 6                | 0              | 4.670853                | 2.939752  | -0.182623 |
| 7                | 1                | 0              | 6.824296                | 2.779582  | -0.415025 |
| 8                | 1                | 0              | 6.838624                | 0.339840  | -0.409679 |
| 9                | 6                | 0              | 2.177816                | 0.105851  | -0.093421 |
| 10               | 1                | 0              | 2.564223                | 2.824284  | -0.000550 |
| 11               | 1                | 0              | 4.669017                | 4.024803  | -0.172605 |
| 12               | 6                | 0              | 2.252372                | -1.387507 | -0.296829 |
| 13               | 6                | 0              | 3.513208                | -1.957643 | 0.333428  |
| 14               | 1                | 0              | 1.395616                | -1.892018 | 0.157094  |
| 15               | 1                | 0              | 3.630779                | -3.012171 | 0.079616  |
| 16               | 6                | 0              | 5.937941                | -2.030271 | -0.262032 |
| 17               | 6                | 0              | 6.672796                | -2.221992 | 1.070385  |
| 18               | 1                | 0              | 6.584943                | -1.558947 | -1.003304 |
| 19               | 1                | 0              | 5.648146                | -3.001313 | -0.671527 |
| 20               | 1                | 0              | 7.566468                | -2.830528 | 0.905556  |
| 21               | 1                | 0              | 6.981729                | -1.263897 | 1.496668  |
| 22               | 1                | 0              | 6.041040                | -2.736801 | 1.799404  |
| 23               | 7                | 0              | 4.703701                | -1.242976 | -0.141483 |
| 24               | 6                | 0              | 0.932007                | 0.747266  | 0.033700  |
| 25               | 6                | 0              | -0.329885               | 0.156586  | -0.054727 |
| 26               | 1                | 0              | 0.929201                | 1.816044  | 0.228610  |
| 27               | 1                | 0              | -0.414023               | -0.904245 | -0.271661 |
| 28               | 6                | 0              | -1.508606               | 0.908776  | 0.120408  |
| 29               | 1                | 0              | -1.402266               | 1.967778  | 0.335043  |
| 30               | 6                | 0              | -2.802699               | 0.404904  | 0.045713  |
| 31               | 6                | 0              | -4.903714               | -0.948929 | -0.152358 |
| 32               | 6                | 0              | -5.132301               | 0.417771  | 0.112799  |
| 33               | 6                | 0              | -5.956417               | -1.850769 | -0.290531 |
| 34               | 6                | 0              | -6.445773               | 0.890512  | 0.246774  |
| 35               | 6                | 0              | -7.258582               | -1.371487 | -0.158372 |
| 36               | 1                | 0              | -5.764125               | -2.898232 | -0.494751 |
| 37               | 6                | 0              | -7.493835               | -0.014169 | 0.108121  |
| 38               | 1                | 0              | -6.653049               | 1.932542  | 0.456080  |
| 39               | 1                | 0              | -8.094226               | -2.055211 | -0.261588 |
| 40               | 1                | 0              | -8.513020               | 0.343250  | 0.210475  |
| 41               | 7                | 0              | -3.951726               | 1.146947  | 0.210654  |
| 42               | 16               | 0              | -3.182218               | -1.289017 | -0.267659 |
| 43               | 6                | 0              | -3.894581               | 2.586304  | 0.469192  |
| 44               | 1                | 0              | -3.405993               | 2.778961  | 1.427515  |
| 45               | 1                | 0              | -3.343895               | 3.086444  | -0.330567 |
| 46               | 1                | 0              | -4.902719               | 2.989182  | 0.500500  |
| 47               | 1                | 0              | 3.460435                | -1.879283 | 1.428137  |
| 48               | 1                | 0              | 2.235061                | -1.632167 | -1.368900 |



002eaa\_mol\_b3lyp631dp\_+2H2\_OL\_PCMw.log

Standard orientation:

| Center<br>Number | Atomic<br>Number | Atomic<br>Type | Coordinates (Angstroms) |           |           |
|------------------|------------------|----------------|-------------------------|-----------|-----------|
|                  |                  |                | X                       | Y         | Z         |
| 1                | 6                | 0              | 6.026743                | 2.050575  | 0.764733  |
| 2                | 6                | 0              | 6.029097                | 0.762452  | 0.272087  |
| 3                | 6                | 0              | 4.807083                | 0.129705  | -0.047336 |
| 4                | 6                | 0              | 3.569274                | 0.822520  | 0.141196  |
| 5                | 6                | 0              | 3.618115                | 2.147062  | 0.651535  |
| 6                | 6                | 0              | 4.817101                | 2.749212  | 0.957444  |
| 7                | 1                | 0              | 6.970543                | 2.527651  | 1.005715  |
| 8                | 1                | 0              | 6.971309                | 0.250310  | 0.138113  |
| 9                | 6                | 0              | 2.331502                | 0.177542  | -0.184129 |
| 10               | 1                | 0              | 2.694233                | 2.690736  | 0.801293  |
| 11               | 1                | 0              | 4.833577                | 3.761358  | 1.346252  |
| 12               | 6                | 0              | 2.391798                | -1.114555 | -0.679218 |
| 13               | 6                | 0              | 3.616875                | -1.751747 | -0.850424 |
| 14               | 1                | 0              | 1.500590                | -1.663640 | -0.949213 |
| 15               | 1                | 0              | 3.674343                | -2.760722 | -1.238441 |
| 16               | 6                | 0              | 6.032388                | -1.956481 | -0.735710 |
| 17               | 6                | 0              | 6.523196                | -2.583083 | 0.567212  |
| 18               | 1                | 0              | 6.776756                | -1.301000 | -1.187133 |
| 19               | 1                | 0              | 5.799077                | -2.726763 | -1.470477 |
| 20               | 1                | 0              | 7.429791                | -3.157024 | 0.358469  |
| 21               | 1                | 0              | 6.761400                | -1.830467 | 1.322033  |
| 22               | 1                | 0              | 5.772231                | -3.262848 | 0.977671  |
| 23               | 7                | 0              | 4.779818                | -1.165928 | -0.551069 |
| 24               | 6                | 0              | 1.019214                | 0.898209  | 0.010524  |
| 25               | 6                | 0              | -0.247636               | 0.128858  | -0.379339 |
| 26               | 1                | 0              | 0.950347                | 1.197548  | 1.064650  |
| 27               | 1                | 0              | -0.309403               | -0.797690 | 0.204184  |
| 28               | 6                | 0              | -1.505779               | 0.974561  | -0.140137 |
| 29               | 1                | 0              | -1.406464               | 1.914807  | -0.695848 |
| 30               | 6                | 0              | -2.794881               | 0.284516  | -0.591379 |
| 31               | 6                | 0              | -4.852507               | -0.932752 | 0.415773  |
| 32               | 6                | 0              | -5.128489               | 0.365612  | -0.055534 |
| 33               | 6                | 0              | -5.862249               | -1.782882 | 0.844284  |
| 34               | 6                | 0              | -6.458380               | 0.794670  | -0.119643 |
| 35               | 6                | 0              | -7.191969               | -1.338882 | 0.794860  |
| 36               | 1                | 0              | -5.626126               | -2.780093 | 1.202749  |
| 37               | 6                | 0              | -7.478901               | -0.062741 | 0.313042  |
| 38               | 1                | 0              | -6.705634               | 1.780317  | -0.497329 |
| 39               | 1                | 0              | -7.991604               | -1.995544 | 1.122277  |
| 40               | 1                | 0              | -8.508711               | 0.277885  | 0.261133  |
| 41               | 7                | 0              | -3.993974               | 1.115766  | -0.387565 |
| 42               | 16               | 0              | -3.105342               | -1.262926 | 0.401800  |
| 43               | 6                | 0              | -4.156558               | 2.227051  | -1.320973 |
| 44               | 1                | 0              | -3.207583               | 2.749830  | -1.442343 |
| 45               | 1                | 0              | -4.505646               | 1.896480  | -2.311122 |
| 46               | 1                | 0              | -4.872957               | 2.946727  | -0.918987 |
| 47               | 1                | 0              | 1.060850                | 1.836416  | -0.557930 |
| 48               | 1                | 0              | -0.200611               | -0.158923 | -1.436760 |
| 49               | 1                | 0              | -1.599934               | 1.235640  | 0.919604  |
| 50               | 1                | 0              | -2.706040               | -0.009563 | -1.650131 |

002faa\_mol\_b3lyp631dp\_+1H2\_AR\_PCMw.log

Standard orientation:

| Center<br>Number | Atomic<br>Number | Atomic<br>Type | Coordinates (Angstroms) |   |   |
|------------------|------------------|----------------|-------------------------|---|---|
|                  |                  |                | X                       | Y | Z |

|    |    |   |           |           |           |
|----|----|---|-----------|-----------|-----------|
| 1  | 6  | 0 | 6.096309  | 2.100816  | -0.048332 |
| 2  | 6  | 0 | 6.033937  | 0.721970  | -0.125316 |
| 3  | 6  | 0 | 4.786919  | 0.060272  | -0.155388 |
| 4  | 6  | 0 | 3.576060  | 0.818041  | -0.097557 |
| 5  | 6  | 0 | 3.692060  | 2.226378  | -0.021083 |
| 6  | 6  | 0 | 4.918203  | 2.861897  | 0.003209  |
| 7  | 1  | 0 | 7.064875  | 2.589522  | -0.027546 |
| 8  | 1  | 0 | 6.955200  | 0.157121  | -0.159651 |
| 9  | 6  | 0 | 2.278662  | 0.143262  | -0.119776 |
| 10 | 1  | 0 | 2.796506  | 2.832533  | 0.018186  |
| 11 | 1  | 0 | 4.967661  | 3.943880  | 0.062445  |
| 12 | 6  | 0 | 2.331078  | -1.273898 | -0.212951 |
| 13 | 6  | 0 | 3.519406  | -1.946574 | -0.270900 |
| 14 | 1  | 0 | 1.427215  | -1.867184 | -0.241802 |
| 15 | 1  | 0 | 3.547919  | -3.026931 | -0.340433 |
| 16 | 6  | 0 | 5.946301  | -2.169654 | -0.262723 |
| 17 | 6  | 0 | 6.528714  | -2.405353 | 1.130931  |
| 18 | 1  | 0 | 6.674489  | -1.709965 | -0.932969 |
| 19 | 1  | 0 | 5.660502  | -3.118737 | -0.718801 |
| 20 | 1  | 0 | 7.415844  | -3.039576 | 1.048288  |
| 21 | 1  | 0 | 6.821766  | -1.469882 | 1.613802  |
| 22 | 1  | 0 | 5.802575  | -2.911977 | 1.772592  |
| 23 | 7  | 0 | 4.727681  | -1.329186 | -0.246754 |
| 24 | 6  | 0 | 1.063246  | 0.858002  | -0.051796 |
| 25 | 6  | 0 | -0.212395 | 0.298407  | -0.073843 |
| 26 | 1  | 0 | 1.104724  | 1.938214  | 0.027066  |
| 27 | 1  | 0 | -0.305181 | -0.782757 | -0.154773 |
| 28 | 6  | 0 | -1.390854 | 1.038219  | 0.002610  |
| 29 | 1  | 0 | -1.317325 | 2.117229  | 0.085675  |
| 30 | 6  | 0 | -2.677318 | 0.483362  | -0.029977 |
| 31 | 6  | 0 | -4.758387 | -0.907659 | -0.117265 |
| 32 | 6  | 0 | -5.002241 | 0.423649  | 0.011345  |
| 33 | 6  | 0 | -5.858562 | -1.913039 | -0.300075 |
| 34 | 6  | 0 | -6.368997 | 0.938000  | 0.032116  |
| 35 | 6  | 0 | -7.142953 | -1.408840 | 0.391719  |
| 36 | 1  | 0 | -6.036845 | -2.054062 | -1.376284 |
| 37 | 6  | 0 | -7.382962 | 0.068671  | 0.183466  |
| 38 | 1  | 0 | -6.555543 | 1.998394  | -0.091312 |
| 39 | 1  | 0 | -7.999205 | -1.989118 | 0.036560  |
| 40 | 1  | 0 | -8.405504 | 0.433237  | 0.207540  |
| 41 | 7  | 0 | -3.836144 | 1.195571  | 0.077389  |
| 42 | 16 | 0 | -3.042234 | -1.226352 | -0.200519 |
| 43 | 6  | 0 | -3.821299 | 2.645705  | 0.289032  |
| 44 | 1  | 0 | -3.186212 | 2.886816  | 1.143887  |
| 45 | 1  | 0 | -3.446480 | 3.157484  | -0.600712 |
| 46 | 1  | 0 | -4.830020 | 2.988390  | 0.501069  |
| 47 | 1  | 0 | -5.577050 | -2.890111 | 0.101848  |
| 48 | 1  | 0 | -7.074487 | -1.595386 | 1.474513  |

002faa\_mol\_TDb3lyp631dp\_+1H2\_AR\_PCMw\_opt.log

Standard orientation:

| Center Number | Atomic Number | Atomic Type | Coordinates (Angstroms) |          |           |
|---------------|---------------|-------------|-------------------------|----------|-----------|
|               |               |             | X                       | Y        | Z         |
| 1             | 6             | 0           | 6.038706                | 2.137369 | -0.392993 |
| 2             | 6             | 0           | 6.014073                | 0.749074 | -0.304063 |
| 3             | 6             | 0           | 4.792519                | 0.059823 | -0.191404 |
| 4             | 6             | 0           | 3.554456                | 0.792285 | -0.144827 |
| 5             | 6             | 0           | 3.630525                | 2.202291 | -0.259627 |
| 6             | 6             | 0           | 4.843581                | 2.864601 | -0.377279 |
| 7             | 1             | 0           | 6.992079                | 2.648044 | -0.480309 |
| 8             | 1             | 0           | 6.950180                | 0.208245 | -0.322855 |
| 9             | 6             | 0           | 2.304605                | 0.081401 | -0.000648 |
| 10            | 1             | 0           | 2.717067                | 2.783305 | -0.269433 |

|    |    |   |           |           |           |
|----|----|---|-----------|-----------|-----------|
| 11 | 1  | 0 | 4.860862  | 3.946556  | -0.460480 |
| 12 | 6  | 0 | 2.369279  | -1.331200 | 0.048126  |
| 13 | 6  | 0 | 3.567407  | -1.992800 | -0.015661 |
| 14 | 1  | 0 | 1.472965  | -1.925644 | 0.172072  |
| 15 | 1  | 0 | 3.629499  | -3.072189 | 0.032663  |
| 16 | 6  | 0 | 5.996740  | -2.139351 | -0.143121 |
| 17 | 6  | 0 | 6.667472  | -2.221136 | 1.229735  |
| 18 | 1  | 0 | 6.672083  | -1.727641 | -0.895882 |
| 19 | 1  | 0 | 5.717330  | -3.137014 | -0.486368 |
| 20 | 1  | 0 | 7.569229  | -2.835665 | 1.155216  |
| 21 | 1  | 0 | 6.955582  | -1.234289 | 1.600153  |
| 22 | 1  | 0 | 5.996320  | -2.681709 | 1.959941  |
| 23 | 7  | 0 | 4.758443  | -1.334019 | -0.133970 |
| 24 | 6  | 0 | 1.043509  | 0.777073  | 0.115959  |
| 25 | 6  | 0 | -0.207803 | 0.224500  | -0.009443 |
| 26 | 1  | 0 | 1.083213  | 1.838885  | 0.340587  |
| 27 | 1  | 0 | -0.307658 | -0.825196 | -0.275190 |
| 28 | 6  | 0 | -1.406185 | 0.980927  | 0.186969  |
| 29 | 1  | 0 | -1.299705 | 2.028928  | 0.449627  |
| 30 | 6  | 0 | -2.680069 | 0.478853  | 0.066178  |
| 31 | 6  | 0 | -4.763411 | -0.870819 | -0.263326 |
| 32 | 6  | 0 | -5.006868 | 0.443866  | 0.072061  |
| 33 | 6  | 0 | -5.862252 | -1.824418 | -0.614493 |
| 34 | 6  | 0 | -6.368869 | 0.939015  | 0.163999  |
| 35 | 6  | 0 | -7.167783 | -1.431693 | 0.108121  |
| 36 | 1  | 0 | -6.015879 | -1.796421 | -1.704447 |
| 37 | 6  | 0 | -7.389069 | 0.057217  | 0.158106  |
| 38 | 1  | 0 | -6.557614 | 2.003531  | 0.234173  |
| 39 | 1  | 0 | -8.015826 | -1.926695 | -0.372955 |
| 40 | 1  | 0 | -8.408447 | 0.421373  | 0.243497  |
| 41 | 7  | 0 | -3.860953 | 1.187813  | 0.269930  |
| 42 | 16 | 0 | -3.061505 | -1.199052 | -0.371561 |
| 43 | 6  | 0 | -3.825059 | 2.580672  | 0.706299  |
| 44 | 1  | 0 | -3.227708 | 2.667476  | 1.618230  |
| 45 | 1  | 0 | -3.388740 | 3.213886  | -0.071908 |
| 46 | 1  | 0 | -4.833722 | 2.923886  | 0.919153  |
| 47 | 1  | 0 | -5.587747 | -2.853811 | -0.367779 |
| 48 | 1  | 0 | -7.144734 | -1.804883 | 1.143523  |

002fac\_mol\_TDb3lyp631dp\_+1H2\_AR\_PCMw\_opt\_TRIPLET.log

Standard orientation:

| Center Number | Atomic Number | Atomic Type | Coordinates (Angstroms) |           |           |
|---------------|---------------|-------------|-------------------------|-----------|-----------|
|               |               |             | X                       | Y         | Z         |
| 1             | 6             | 0           | 6.034598                | 2.198369  | -0.049709 |
| 2             | 6             | 0           | 6.024083                | 0.810962  | -0.127335 |
| 3             | 6             | 0           | 4.810589                | 0.100224  | -0.157030 |
| 4             | 6             | 0           | 3.562691                | 0.804661  | -0.096298 |
| 5             | 6             | 0           | 3.623882                | 2.214413  | -0.020059 |
| 6             | 6             | 0           | 4.828088                | 2.902810  | 0.002521  |
| 7             | 1             | 0           | 6.982935                | 2.725093  | -0.028818 |
| 8             | 1             | 0           | 6.967905                | 0.283950  | -0.161250 |
| 9             | 6             | 0           | 2.308912                | 0.061529  | -0.115825 |
| 10            | 1             | 0           | 2.705356                | 2.786623  | 0.021770  |
| 11            | 1             | 0           | 4.827732                | 3.986428  | 0.062250  |
| 12            | 6             | 0           | 2.411221                | -1.354612 | -0.202817 |
| 13            | 6             | 0           | 3.620799                | -1.984411 | -0.265009 |
| 14            | 1             | 0           | 1.524821                | -1.975380 | -0.224460 |
| 15            | 1             | 0           | 3.703207                | -3.061445 | -0.332145 |
| 16            | 6             | 0           | 6.059428                | -2.078840 | -0.276300 |
| 17            | 6             | 0           | 6.658175                | -2.299312 | 1.114407  |
| 18            | 1             | 0           | 6.767209                | -1.581377 | -0.942491 |
| 19            | 1             | 0           | 5.820272                | -3.038120 | -0.739046 |
| 20            | 1             | 0           | 7.574397                | -2.890254 | 1.026396  |

|    |    |   |           |           |           |
|----|----|---|-----------|-----------|-----------|
| 21 | 1  | 0 | 6.906673  | -1.354092 | 1.603478  |
| 22 | 1  | 0 | 5.957655  | -2.844013 | 1.753593  |
| 23 | 7  | 0 | 4.807908  | -1.298690 | -0.251804 |
| 24 | 6  | 0 | 1.039403  | 0.708028  | -0.049535 |
| 25 | 6  | 0 | -0.214699 | 0.117793  | -0.068671 |
| 26 | 1  | 0 | 1.040170  | 1.791417  | 0.025981  |
| 27 | 1  | 0 | -0.314164 | -0.961047 | -0.143785 |
| 28 | 6  | 0 | -1.394492 | 0.901986  | 0.007176  |
| 29 | 1  | 0 | -1.272202 | 1.978573  | 0.084476  |
| 30 | 6  | 0 | -2.689376 | 0.416937  | -0.017098 |
| 31 | 6  | 0 | -4.804501 | -0.901124 | -0.110342 |
| 32 | 6  | 0 | -5.008647 | 0.459058  | 0.001132  |
| 33 | 6  | 0 | -5.936669 | -1.866595 | -0.288133 |
| 34 | 6  | 0 | -6.358628 | 1.004712  | 0.019454  |
| 35 | 6  | 0 | -7.215803 | -1.319539 | 0.379209  |
| 36 | 1  | 0 | -6.108469 | -2.008488 | -1.365319 |
| 37 | 6  | 0 | -7.397237 | 0.163365  | 0.176695  |
| 38 | 1  | 0 | -6.517451 | 2.069801  | -0.097271 |
| 39 | 1  | 0 | -8.085522 | -1.863453 | 0.000627  |
| 40 | 1  | 0 | -8.406158 | 0.563737  | 0.207797  |
| 41 | 7  | 0 | -3.843247 | 1.185386  | 0.069221  |
| 42 | 16 | 0 | -3.114735 | -1.290190 | -0.162158 |
| 43 | 6  | 0 | -3.771163 | 2.637027  | 0.249779  |
| 44 | 1  | 0 | -3.142011 | 2.867721  | 1.111866  |
| 45 | 1  | 0 | -3.356346 | 3.109013  | -0.644179 |
| 46 | 1  | 0 | -4.767008 | 3.029374  | 0.433720  |
| 47 | 1  | 0 | -5.686779 | -2.849413 | 0.120200  |
| 48 | 1  | 0 | -7.183020 | -1.513134 | 1.461950  |

-----  
002fad\_mol\_TDb3lyp631dp\_+1H2\_AR\_PCMw\_opt\_rot.log

Standard orientation:

| Center<br>Number | Atomic<br>Number | Atomic<br>Type | Coordinates (Angstroms) |           |           |
|------------------|------------------|----------------|-------------------------|-----------|-----------|
|                  |                  |                | X                       | Y         | Z         |
| 1                | 6                | 0              | 4.881367                | -0.225733 | 2.769720  |
| 2                | 6                | 0              | 5.266625                | -0.315530 | 1.436094  |
| 3                | 6                | 0              | 4.371541                | 0.007425  | 0.400858  |
| 4                | 6                | 0              | 3.035429                | 0.425299  | 0.712658  |
| 5                | 6                | 0              | 2.690045                | 0.499676  | 2.081357  |
| 6                | 6                | 0              | 3.586645                | 0.185632  | 3.093585  |
| 7                | 1                | 0              | 5.592226                | -0.480061 | 3.549008  |
| 8                | 1                | 0              | 6.271197                | -0.643467 | 1.205551  |
| 9                | 6                | 0              | 2.102947                | 0.747211  | -0.360291 |
| 10               | 1                | 0              | 1.691391                | 0.812297  | 2.360479  |
| 11               | 1                | 0              | 3.275568                | 0.257761  | 4.130808  |
| 12               | 6                | 0              | 2.604909                | 0.628472  | -1.688122 |
| 13               | 6                | 0              | 3.883441                | 0.234783  | -1.940488 |
| 14               | 1                | 0              | 1.975654                | 0.857140  | -2.538789 |
| 15               | 1                | 0              | 4.268248                | 0.146501  | -2.948090 |
| 16               | 6                | 0              | 6.118351                | -0.536013 | -1.321882 |
| 17               | 6                | 0              | 6.251080                | -2.060593 | -1.327398 |
| 18               | 1                | 0              | 6.854380                | -0.075719 | -0.658489 |
| 19               | 1                | 0              | 6.315009                | -0.140171 | -2.320364 |
| 20               | 1                | 0              | 7.264581                | -2.341077 | -1.628896 |
| 21               | 1                | 0              | 6.058956                | -2.486844 | -0.339353 |
| 22               | 1                | 0              | 5.546352                | -2.505771 | -2.035732 |
| 23               | 7                | 0              | 4.776227                | -0.068850 | -0.939080 |
| 24               | 6                | 0              | 0.752516                | 1.151736  | -0.105112 |
| 25               | 6                | 0              | -0.214436               | 1.441531  | -1.025029 |
| 26               | 1                | 0              | 0.450421                | 1.230413  | 0.934858  |
| 27               | 1                | 0              | -0.010668               | 1.409276  | -2.093713 |
| 28               | 6                | 0              | -1.575808               | 1.866440  | -0.642558 |
| 29               | 1                | 0              | -1.802937               | 2.925999  | -0.537245 |
| 30               | 6                | 0              | -2.588460               | 0.975907  | -0.447308 |

|    |    |   |           |           |           |
|----|----|---|-----------|-----------|-----------|
| 31 | 6  | 0 | -4.030382 | -1.037175 | -0.237878 |
| 32 | 6  | 0 | -4.704804 | 0.152459  | -0.000572 |
| 33 | 6  | 0 | -4.736672 | -2.356811 | -0.254172 |
| 34 | 6  | 0 | -6.123422 | 0.150155  | 0.314004  |
| 35 | 6  | 0 | -5.968503 | -2.325607 | 0.673586  |
| 36 | 1  | 0 | -5.054369 | -2.558023 | -1.286815 |
| 37 | 6  | 0 | -6.717255 | -1.020312 | 0.615689  |
| 38 | 1  | 0 | -6.684505 | 1.075812  | 0.308779  |
| 39 | 1  | 0 | -6.634387 | -3.154778 | 0.420995  |
| 40 | 1  | 0 | -7.771673 | -1.027191 | 0.873992  |
| 41 | 7  | 0 | -3.903989 | 1.259256  | -0.103640 |
| 42 | 16 | 0 | -2.369672 | -0.768440 | -0.605560 |
| 43 | 6  | 0 | -4.340192 | 2.639658  | 0.130089  |
| 44 | 1  | 0 | -3.653846 | 3.119942  | 0.828329  |
| 45 | 1  | 0 | -4.357055 | 3.191735  | -0.811749 |
| 46 | 1  | 0 | -5.334257 | 2.636195  | 0.567563  |
| 47 | 1  | 0 | -4.062697 | -3.168029 | 0.030184  |
| 48 | 1  | 0 | -5.658290 | -2.491409 | 1.715701  |

-----  
002fae\_mol\_TDb3lyp631dp\_+1H2\_AR\_PCMw\_opt\_rot\_1.log

Standard orientation:

| Center<br>Number | Atomic<br>Number | Atomic<br>Type | Coordinates (Angstroms) |           |           |
|------------------|------------------|----------------|-------------------------|-----------|-----------|
|                  |                  |                | X                       | Y         | Z         |
| 1                | 6                | 0              | 4.785795                | 2.475646  | -1.311344 |
| 2                | 6                | 0              | 5.248322                | 1.174942  | -1.081014 |
| 3                | 6                | 0              | 4.460964                | 0.242704  | -0.391875 |
| 4                | 6                | 0              | 3.165549                | 0.629965  | 0.092941  |
| 5                | 6                | 0              | 2.735467                | 1.952537  | -0.158064 |
| 6                | 6                | 0              | 3.529777                | 2.863758  | -0.850094 |
| 7                | 1                | 0              | 5.417171                | 3.175426  | -1.848873 |
| 8                | 1                | 0              | 6.230937                | 0.901270  | -1.441808 |
| 9                | 6                | 0              | 2.364992                | -0.325497 | 0.808874  |
| 10               | 1                | 0              | 1.757781                | 2.257882  | 0.198854  |
| 11               | 1                | 0              | 3.167516                | 3.872063  | -1.024404 |
| 12               | 6                | 0              | 2.890142                | -1.614969 | 1.028598  |
| 13               | 6                | 0              | 4.123975                | -1.962498 | 0.548607  |
| 14               | 1                | 0              | 2.319309                | -2.356739 | 1.575177  |
| 15               | 1                | 0              | 4.547914                | -2.946736 | 0.689766  |
| 16               | 6                | 0              | 6.232823                | -1.516089 | -0.608260 |
| 17               | 6                | 0              | 7.356729                | -1.110909 | 0.348510  |
| 18               | 1                | 0              | 6.414612                | -1.133826 | -1.615744 |
| 19               | 1                | 0              | 6.189097                | -2.604038 | -0.694747 |
| 20               | 1                | 0              | 8.315916                | -1.474674 | -0.031645 |
| 21               | 1                | 0              | 7.421868                | -0.025035 | 0.456792  |
| 22               | 1                | 0              | 7.193124                | -1.544726 | 1.339307  |
| 23               | 7                | 0              | 4.903600                | -1.070575 | -0.167970 |
| 24               | 6                | 0              | 1.045436                | 0.043150  | 1.359450  |
| 25               | 6                | 0              | -0.142440               | -0.124738 | 0.688673  |
| 26               | 1                | 0              | 0.998502                | 0.467046  | 2.365574  |
| 27               | 1                | 0              | -0.115324               | -0.536745 | -0.316920 |
| 28               | 6                | 0              | -1.377780               | 0.221164  | 1.261669  |
| 29               | 1                | 0              | -1.371234               | 0.646673  | 2.257480  |
| 30               | 6                | 0              | -2.625778               | 0.028853  | 0.626510  |
| 31               | 6                | 0              | -4.493937               | -0.209435 | -1.066496 |
| 32               | 6                | 0              | -4.953955               | -0.137955 | 0.377443  |
| 33               | 6                | 0              | -5.497143               | -0.972818 | -1.887373 |
| 34               | 6                | 0              | -6.302245               | 0.532842  | 0.435571  |
| 35               | 6                | 0              | -6.792679               | -0.730561 | -1.612435 |
| 36               | 1                | 0              | -5.181607               | -1.584047 | -2.725069 |
| 37               | 6                | 0              | -7.178356               | 0.177461  | -0.523274 |
| 38               | 1                | 0              | -6.587597               | 1.159483  | 1.272300  |
| 39               | 1                | 0              | -7.575627               | -1.175647 | -2.218282 |
| 40               | 1                | 0              | -8.199869               | 0.542738  | -0.491550 |

|    |    |   |           |           |           |
|----|----|---|-----------|-----------|-----------|
| 41 | 7  | 0 | -3.805177 | 0.437780  | 1.110183  |
| 42 | 16 | 0 | -2.769132 | -0.840071 | -0.907358 |
| 43 | 6  | 0 | -4.014502 | 1.135230  | 2.378996  |
| 44 | 1  | 0 | -4.439136 | 0.447072  | 3.115418  |
| 45 | 1  | 0 | -3.078515 | 1.538732  | 2.753922  |
| 46 | 1  | 0 | -4.703620 | 1.964538  | 2.216392  |
| 47 | 1  | 0 | -4.399774 | 0.812049  | -1.465638 |
| 48 | 1  | 0 | -5.071223 | -1.168759 | 0.762255  |

002fba\_mol\_b3lyp631dp\_+2H2\_ARB\_PCMw.log

Standard orientation:

| Center<br>Number | Atomic<br>Number | Atomic<br>Type | Coordinates (Angstroms) |           |           |
|------------------|------------------|----------------|-------------------------|-----------|-----------|
|                  |                  |                | X                       | Y         | Z         |
| 1                | 6                | 0              | 6.135828                | 2.097191  | -0.225617 |
| 2                | 6                | 0              | 6.073661                | 0.717228  | -0.230092 |
| 3                | 6                | 0              | 4.825989                | 0.056588  | -0.191226 |
| 4                | 6                | 0              | 3.616137                | 0.817262  | -0.139148 |
| 5                | 6                | 0              | 3.732535                | 2.228927  | -0.138762 |
| 6                | 6                | 0              | 4.958193                | 2.861688  | -0.180739 |
| 7                | 1                | 0              | 7.103769                | 2.586370  | -0.256987 |
| 8                | 1                | 0              | 6.993842                | 0.150818  | -0.261210 |
| 9                | 6                | 0              | 2.323673                | 0.143057  | -0.091209 |
| 10               | 1                | 0              | 2.838443                | 2.837213  | -0.107035 |
| 11               | 1                | 0              | 5.009903                | 3.945092  | -0.178953 |
| 12               | 6                | 0              | 2.370405                | -1.272273 | -0.111814 |
| 13               | 6                | 0              | 3.559154                | -1.950452 | -0.168050 |
| 14               | 1                | 0              | 1.466120                | -1.864680 | -0.082571 |
| 15               | 1                | 0              | 3.585296                | -3.032901 | -0.181486 |
| 16               | 6                | 0              | 5.983438                | -2.176925 | -0.216420 |
| 17               | 6                | 0              | 6.605680                | -2.337059 | 1.170375  |
| 18               | 1                | 0              | 6.689293                | -1.752949 | -0.932169 |
| 19               | 1                | 0              | 5.683423                | -3.148088 | -0.612323 |
| 20               | 1                | 0              | 7.488462                | -2.978041 | 1.095167  |
| 21               | 1                | 0              | 6.915191                | -1.377911 | 1.592504  |
| 22               | 1                | 0              | 5.898100                | -2.805702 | 1.859682  |
| 23               | 7                | 0              | 4.763542                | -1.334408 | -0.208442 |
| 24               | 6                | 0              | 1.104177                | 0.866281  | -0.026846 |
| 25               | 6                | 0              | -0.163502               | 0.307981  | 0.004494  |
| 26               | 1                | 0              | 1.150664                | 1.948486  | 0.002365  |
| 27               | 1                | 0              | -0.263180               | -0.774500 | -0.030410 |
| 28               | 6                | 0              | -1.347968               | 1.053832  | 0.087709  |
| 29               | 1                | 0              | -1.268938               | 2.133245  | 0.161238  |
| 30               | 6                | 0              | -2.623612               | 0.493773  | 0.072025  |
| 31               | 6                | 0              | -4.668610               | -1.013491 | 0.321130  |
| 32               | 6                | 0              | -4.980562               | 0.413808  | -0.113063 |
| 33               | 6                | 0              | -5.711110               | -1.967795 | -0.182540 |
| 34               | 6                | 0              | -6.331404               | 0.822179  | 0.464951  |
| 35               | 6                | 0              | -6.960600               | -1.527680 | -0.371572 |
| 36               | 6                | 0              | -7.409197               | -0.100269 | -0.157488 |
| 37               | 1                | 0              | -6.315853               | 0.719145  | 1.555669  |
| 38               | 1                | 0              | -7.724457               | -2.227289 | -0.704205 |
| 39               | 1                | 0              | -8.304999               | -0.091895 | 0.474486  |
| 40               | 7                | 0              | -3.776912               | 1.176284  | 0.274179  |
| 41               | 16               | 0              | -2.925071               | -1.230116 | -0.264546 |
| 42               | 6                | 0              | -3.795012               | 2.628589  | 0.420820  |
| 43               | 1                | 0              | -3.051757               | 2.933672  | 1.159605  |
| 44               | 1                | 0              | -3.586218               | 3.133917  | -0.529733 |
| 45               | 1                | 0              | -4.774822               | 2.938257  | 0.779725  |
| 46               | 1                | 0              | -5.453053               | -3.012708 | -0.325728 |
| 47               | 1                | 0              | -4.606293               | -1.054152 | 1.415418  |
| 48               | 1                | 0              | -5.055079               | 0.436173  | -1.211977 |
| 49               | 1                | 0              | -6.574520               | 1.863064  | 0.234610  |
| 50               | 1                | 0              | -7.732367               | 0.309445  | -1.124601 |

-----  
002fda\_mol\_b3lyp631dp\_+3H2\_ARB\_PCMw.log

Standard orientation:

| Center<br>Number | Atomic<br>Number | Atomic<br>Type | Coordinates (Angstroms) |           |           |
|------------------|------------------|----------------|-------------------------|-----------|-----------|
|                  |                  |                | X                       | Y         | Z         |
| 1                | 6                | 0              | 6.228928                | 2.073203  | -0.146725 |
| 2                | 6                | 0              | 6.154386                | 0.694137  | -0.178595 |
| 3                | 6                | 0              | 4.900466                | 0.044347  | -0.169097 |
| 4                | 6                | 0              | 3.696911                | 0.814993  | -0.118584 |
| 5                | 6                | 0              | 3.826023                | 2.225129  | -0.088716 |
| 6                | 6                | 0              | 5.057767                | 2.847452  | -0.102323 |
| 7                | 1                | 0              | 7.201577                | 2.553906  | -0.155769 |
| 8                | 1                | 0              | 7.069850                | 0.119968  | -0.208206 |
| 9                | 6                | 0              | 2.397443                | 0.152037  | -0.100632 |
| 10               | 1                | 0              | 2.937036                | 2.840796  | -0.055696 |
| 11               | 1                | 0              | 5.119063                | 3.930100  | -0.078340 |
| 12               | 6                | 0              | 2.432289                | -1.263492 | -0.146137 |
| 13               | 6                | 0              | 3.615370                | -1.951131 | -0.199767 |
| 14               | 1                | 0              | 1.522523                | -1.848143 | -0.140989 |
| 15               | 1                | 0              | 3.631996                | -3.033358 | -0.233500 |
| 16               | 6                | 0              | 6.038019                | -2.198941 | -0.222011 |
| 17               | 6                | 0              | 6.638928                | -2.393699 | 1.169782  |
| 18               | 1                | 0              | 6.757963                | -1.766985 | -0.918686 |
| 19               | 1                | 0              | 5.734985                | -3.158901 | -0.642265 |
| 20               | 1                | 0              | 7.517781                | -3.039966 | 1.093650  |
| 21               | 1                | 0              | 6.949608                | -1.446185 | 1.616657  |
| 22               | 1                | 0              | 5.917917                | -2.871230 | 1.838796  |
| 23               | 7                | 0              | 4.825951                | -1.345515 | -0.213583 |
| 24               | 6                | 0              | 1.184037                | 0.884568  | -0.041252 |
| 25               | 6                | 0              | -0.088998               | 0.336128  | -0.027899 |
| 26               | 1                | 0              | 1.238832                | 1.966043  | -0.000763 |
| 27               | 1                | 0              | -0.196042               | -0.745346 | -0.071142 |
| 28               | 6                | 0              | -1.268340               | 1.089518  | 0.047106  |
| 29               | 1                | 0              | -1.182665               | 2.168071  | 0.124659  |
| 30               | 6                | 0              | -2.548047               | 0.536540  | 0.017586  |
| 31               | 6                | 0              | -4.613904               | -0.966494 | 0.206861  |
| 32               | 6                | 0              | -4.913139               | 0.478877  | -0.183437 |
| 33               | 6                | 0              | -5.641570               | -1.928577 | -0.377321 |
| 34               | 6                | 0              | -6.241200               | 0.912124  | 0.438114  |
| 35               | 6                | 0              | -7.026922               | -1.524759 | 0.171105  |
| 36               | 1                | 0              | -5.629908               | -1.869769 | -1.472240 |
| 37               | 6                | 0              | -7.346119               | -0.038780 | -0.072308 |
| 38               | 1                | 0              | -6.171027               | 0.873722  | 1.532068  |
| 39               | 1                | 0              | -7.798550               | -2.150502 | -0.289341 |
| 40               | 1                | 0              | -8.294830               | 0.221529  | 0.407663  |
| 41               | 7                | 0              | -3.697649               | 1.225777  | 0.204850  |
| 42               | 16               | 0              | -2.855674               | -1.183648 | -0.315290 |
| 43               | 6                | 0              | -3.704580               | 2.678316  | 0.353418  |
| 44               | 1                | 0              | -2.966315               | 2.976747  | 1.099848  |
| 45               | 1                | 0              | -3.481733               | 3.182247  | -0.594684 |
| 46               | 1                | 0              | -4.685055               | 2.996565  | 0.702247  |
| 47               | 1                | 0              | -5.409131               | -2.961523 | -0.100923 |
| 48               | 1                | 0              | -7.055591               | -1.732176 | 1.248606  |
| 49               | 1                | 0              | -4.617004               | -1.046146 | 1.299744  |
| 50               | 1                | 0              | -5.008729               | 0.538528  | -1.280095 |
| 51               | 1                | 0              | -6.492133               | 1.939773  | 0.157762  |
| 52               | 1                | 0              | -7.484237               | 0.129793  | -1.148298 |

-----  
002gdb\_mol\_b3lyp631dp\_+1H2\_ARA\_PCMw.log

Standard orientation:

| Center<br>Number | Atomic<br>Number | Atomic<br>Type | Coordinates (Angstroms) |           |           |
|------------------|------------------|----------------|-------------------------|-----------|-----------|
|                  |                  |                | X                       | Y         | Z         |
| 1                | 6                | 0              | 5.936905                | 2.124401  | -0.250060 |
| 2                | 6                | 0              | 5.927642                | 0.782166  | -0.283334 |
| 3                | 6                | 0              | 4.616494                | 0.062768  | -0.525331 |
| 4                | 6                | 0              | 3.469454                | 0.791562  | 0.204779  |
| 5                | 6                | 0              | 3.507926                | 2.258052  | -0.187439 |
| 6                | 6                | 0              | 4.687216                | 2.873403  | -0.371914 |
| 7                | 1                | 0              | 6.873553                | 2.666101  | -0.159288 |
| 8                | 1                | 0              | 6.854510                | 0.224440  | -0.244064 |
| 9                | 6                | 0              | 2.133098                | 0.072009  | 0.025435  |
| 10               | 1                | 0              | 2.583642                | 2.818475  | -0.257375 |
| 11               | 1                | 0              | 4.727618                | 3.935110  | -0.596352 |
| 12               | 6                | 0              | 2.221221                | -1.324358 | -0.121098 |
| 13               | 6                | 0              | 3.443048                | -1.981259 | -0.107059 |
| 14               | 1                | 0              | 1.335091                | -1.945669 | -0.129319 |
| 15               | 1                | 0              | 3.470552                | -3.064672 | -0.038738 |
| 16               | 6                | 0              | 5.868047                | -2.173706 | -0.178548 |
| 17               | 6                | 0              | 6.540283                | -2.240207 | 1.194013  |
| 18               | 1                | 0              | 6.544175                | -1.764853 | -0.933527 |
| 19               | 1                | 0              | 5.602609                | -3.179676 | -0.513075 |
| 20               | 1                | 0              | 7.449979                | -2.844702 | 1.128707  |
| 21               | 1                | 0              | 6.813235                | -1.247137 | 1.560306  |
| 22               | 1                | 0              | 5.871335                | -2.701861 | 1.925920  |
| 23               | 7                | 0              | 4.630528                | -1.374208 | -0.176825 |
| 24               | 6                | 0              | 0.930601                | 0.781862  | 0.152809  |
| 25               | 6                | 0              | -0.351456               | 0.234589  | 0.050838  |
| 26               | 1                | 0              | 0.981835                | 1.845425  | 0.359516  |
| 27               | 1                | 0              | -0.441858               | -0.829122 | -0.159998 |
| 28               | 6                | 0              | -1.522990               | 0.971385  | 0.190656  |
| 29               | 1                | 0              | -1.443074               | 2.032877  | 0.397415  |
| 30               | 6                | 0              | -2.810364               | 0.429103  | 0.087283  |
| 31               | 6                | 0              | -4.885584               | -0.960869 | -0.153303 |
| 32               | 6                | 0              | -5.139822               | 0.398344  | 0.095577  |
| 33               | 6                | 0              | -5.919680               | -1.880493 | -0.311208 |
| 34               | 6                | 0              | -6.457806               | 0.856325  | 0.195628  |
| 35               | 6                | 0              | -7.231332               | -1.417847 | -0.213691 |
| 36               | 1                | 0              | -5.707838               | -2.926388 | -0.503289 |
| 37               | 6                | 0              | -7.491835               | -0.064259 | 0.037806  |
| 38               | 1                | 0              | -6.684159               | 1.896653  | 0.393562  |
| 39               | 1                | 0              | -8.054246               | -2.114465 | -0.332437 |
| 40               | 1                | 0              | -8.517655               | 0.280376  | 0.113631  |
| 41               | 7                | 0              | -3.959951               | 1.145528  | 0.216620  |
| 42               | 16               | 0              | -3.153295               | -1.268656 | -0.220585 |
| 43               | 6                | 0              | -3.935483               | 2.590482  | 0.465510  |
| 44               | 1                | 0              | -3.487072               | 2.797583  | 1.439765  |
| 45               | 1                | 0              | -3.364225               | 3.091978  | -0.318013 |
| 46               | 1                | 0              | -4.951058               | 2.974860  | 0.454417  |
| 47               | 1                | 0              | 3.691132                | 0.739023  | 1.289512  |
| 48               | 1                | 0              | 4.397087                | 0.114199  | -1.610578 |

002gdb\_mol\_TDb3lyp631dp\_+1H2\_ARA\_PCMw\_opt.log

Standard orientation:

| Center<br>Number | Atomic<br>Number | Atomic<br>Type | Coordinates (Angstroms) |          |           |
|------------------|------------------|----------------|-------------------------|----------|-----------|
|                  |                  |                | X                       | Y        | Z         |
| 1                | 6                | 0              | 5.924173                | 2.144214 | -0.312961 |
| 2                | 6                | 0              | 5.928871                | 0.802058 | -0.375325 |
| 3                | 6                | 0              | 4.616000                | 0.068492 | -0.544908 |
| 4                | 6                | 0              | 3.491625                | 0.778656 | 0.256741  |
| 5                | 6                | 0              | 3.503696                | 2.256282 | -0.083772 |
| 6                | 6                | 0              | 4.665477                | 2.886333 | -0.324649 |
| 7                | 1                | 0              | 6.860504                | 2.692918 | -0.275936 |



|    |    |   |           |           |           |
|----|----|---|-----------|-----------|-----------|
| 8  | 1  | 0 | 6.865144  | 0.260040  | -0.415066 |
| 9  | 6  | 0 | 2.162222  | 0.054997  | 0.083412  |
| 10 | 1  | 0 | 2.577235  | 2.817469  | -0.062337 |
| 11 | 1  | 0 | 4.687071  | 3.956343  | -0.508483 |
| 12 | 6  | 0 | 2.258721  | -1.355125 | -0.035073 |
| 13 | 6  | 0 | 3.484682  | -2.008544 | -0.076703 |
| 14 | 1  | 0 | 1.373059  | -1.978176 | -0.021284 |
| 15 | 1  | 0 | 3.534988  | -3.090545 | -0.012353 |
| 16 | 6  | 0 | 5.911685  | -2.138188 | -0.201540 |
| 17 | 6  | 0 | 6.595872  | -2.152623 | 1.170386  |
| 18 | 1  | 0 | 6.577927  | -1.736677 | -0.969295 |
| 19 | 1  | 0 | 5.665205  | -3.159353 | -0.503795 |
| 20 | 1  | 0 | 7.514862  | -2.743927 | 1.111945  |
| 21 | 1  | 0 | 6.855547  | -1.144540 | 1.503334  |
| 22 | 1  | 0 | 5.939984  | -2.604325 | 1.919794  |
| 23 | 7  | 0 | 4.660785  | -1.368606 | -0.212409 |
| 24 | 6  | 0 | 0.929913  | 0.718694  | 0.161389  |
| 25 | 6  | 0 | -0.348923 | 0.141097  | 0.030053  |
| 26 | 1  | 0 | 0.940571  | 1.787464  | 0.353071  |
| 27 | 1  | 0 | -0.436051 | -0.919586 | -0.186779 |
| 28 | 6  | 0 | -1.520128 | 0.899187  | 0.166226  |
| 29 | 1  | 0 | -1.414061 | 1.961194  | 0.366071  |
| 30 | 6  | 0 | -2.819536 | 0.397378  | 0.072778  |
| 31 | 6  | 0 | -4.917734 | -0.955596 | -0.147024 |
| 32 | 6  | 0 | -5.148109 | 0.422212  | 0.084651  |
| 33 | 6  | 0 | -5.968975 | -1.857380 | -0.291447 |
| 34 | 6  | 0 | -6.466576 | 0.898524  | 0.177781  |
| 35 | 6  | 0 | -7.273303 | -1.372661 | -0.200719 |
| 36 | 1  | 0 | -5.774335 | -2.909328 | -0.468871 |
| 37 | 6  | 0 | -7.510975 | -0.008176 | 0.032480  |
| 38 | 1  | 0 | -6.677498 | 1.944580  | 0.361554  |
| 39 | 1  | 0 | -8.108363 | -2.056210 | -0.309770 |
| 40 | 1  | 0 | -8.531955 | 0.352160  | 0.103362  |
| 41 | 7  | 0 | -3.973212 | 1.145945  | 0.194073  |
| 42 | 16 | 0 | -3.197500 | -1.300574 | -0.213591 |
| 43 | 6  | 0 | -3.916076 | 2.589115  | 0.425972  |
| 44 | 1  | 0 | -3.458913 | 2.798696  | 1.396784  |
| 45 | 1  | 0 | -3.333498 | 3.069799  | -0.363501 |
| 46 | 1  | 0 | -4.921840 | 2.999109  | 0.413399  |
| 47 | 1  | 0 | 3.775942  | 0.689413  | 1.323945  |
| 48 | 1  | 0 | 4.339845  | 0.127622  | -1.616462 |

002gdc\_mol\_TDb3lyp631dp\_+1H2\_ARA\_PCMw\_opt\_TRIPLET.log

Standard orientation:

| Center<br>Number | Atomic<br>Number | Atomic<br>Type | Coordinates (Angstroms) |           |           |
|------------------|------------------|----------------|-------------------------|-----------|-----------|
|                  |                  |                | X                       | Y         | Z         |
| 1                | 6                | 0              | 5.897645                | 2.186431  | -0.287960 |
| 2                | 6                | 0              | 5.927473                | 0.844260  | -0.328213 |
| 3                | 6                | 0              | 4.629370                | 0.089580  | -0.529420 |
| 4                | 6                | 0              | 3.483746                | 0.782984  | 0.246609  |
| 5                | 6                | 0              | 3.471026                | 2.253663  | -0.128072 |
| 6                | 6                | 0              | 4.624980                | 2.903373  | -0.352328 |
| 7                | 1                | 0              | 6.821806                | 2.753509  | -0.228688 |
| 8                | 1                | 0              | 6.872805                | 0.316747  | -0.326143 |
| 9                | 6                | 0              | 2.172140                | 0.025447  | 0.074336  |
| 10               | 1                | 0              | 2.532012                | 2.794581  | -0.142238 |
| 11               | 1                | 0              | 4.630199                | 3.969223  | -0.560067 |
| 12               | 6                | 0              | 2.293557                | -1.373586 | -0.023360 |
| 13               | 6                | 0              | 3.530936                | -2.013792 | -0.055957 |
| 14               | 1                | 0              | 1.417372                | -2.010647 | -0.011628 |
| 15               | 1                | 0              | 3.598616                | -3.093342 | 0.013547  |
| 16               | 6                | 0              | 5.957611                | -2.105056 | -0.216291 |
| 17               | 6                | 0              | 6.650948                | -2.149714 | 1.148139  |

|    |    |   |           |           |           |
|----|----|---|-----------|-----------|-----------|
| 18 | 1  | 0 | 6.607249  | -1.668295 | -0.978156 |
| 19 | 1  | 0 | 5.722178  | -3.118770 | -0.549228 |
| 20 | 1  | 0 | 7.580014  | -2.721431 | 1.065895  |
| 21 | 1  | 0 | 6.893922  | -1.148069 | 1.511747  |
| 22 | 1  | 0 | 6.009759  | -2.636978 | 1.887911  |
| 23 | 7  | 0 | 4.694271  | -1.350240 | -0.189759 |
| 24 | 6  | 0 | 0.915411  | 0.658516  | 0.156124  |
| 25 | 6  | 0 | -0.352866 | 0.078900  | 0.015580  |
| 26 | 1  | 0 | 0.913037  | 1.726415  | 0.360793  |
| 27 | 1  | 0 | -0.443962 | -0.978712 | -0.213326 |
| 28 | 6  | 0 | -1.520093 | 0.848018  | 0.163282  |
| 29 | 1  | 0 | -1.400252 | 1.906408  | 0.375215  |
| 30 | 6  | 0 | -2.824973 | 0.368139  | 0.067312  |
| 31 | 6  | 0 | -4.944333 | -0.949822 | -0.154281 |
| 32 | 6  | 0 | -5.153789 | 0.424061  | 0.091852  |
| 33 | 6  | 0 | -6.010270 | -1.834821 | -0.300947 |
| 34 | 6  | 0 | -6.461608 | 0.920206  | 0.199435  |
| 35 | 6  | 0 | -7.305951 | -1.331968 | -0.196353 |
| 36 | 1  | 0 | -5.832721 | -2.887691 | -0.490314 |
| 37 | 6  | 0 | -7.522233 | 0.032076  | 0.052316  |
| 38 | 1  | 0 | -6.654332 | 1.967495  | 0.396105  |
| 39 | 1  | 0 | -8.151472 | -2.002294 | -0.306640 |
| 40 | 1  | 0 | -8.536742 | 0.407608  | 0.134308  |
| 41 | 7  | 0 | -3.963963 | 1.134230  | 0.200621  |
| 42 | 16 | 0 | -3.227546 | -1.321455 | -0.234884 |
| 43 | 6  | 0 | -3.887576 | 2.575083  | 0.445038  |
| 44 | 1  | 0 | -3.448568 | 2.770904  | 1.426619  |
| 45 | 1  | 0 | -3.282568 | 3.051216  | -0.329400 |
| 46 | 1  | 0 | -4.886204 | 3.001137  | 0.412921  |
| 47 | 1  | 0 | 3.761826  | 0.727174  | 1.318008  |
| 48 | 1  | 0 | 4.377705  | 0.137297  | -1.606146 |

002gdd\_mol\_TDb3lyp631dp\_+1H2\_ARA\_PCMw\_opt\_rot.log

Standard orientation:

| Center<br>Number | Atomic<br>Number | Atomic<br>Type | Coordinates (Angstroms) |           |           |
|------------------|------------------|----------------|-------------------------|-----------|-----------|
|                  |                  |                | X                       | Y         | Z         |
| 1                | 6                | 0              | 5.897976                | 2.186560  | -0.285452 |
| 2                | 6                | 0              | 5.927697                | 0.844404  | -0.326269 |
| 3                | 6                | 0              | 4.629613                | 0.090015  | -0.528904 |
| 4                | 6                | 0              | 3.483685                | 0.783111  | 0.246960  |
| 5                | 6                | 0              | 3.471275                | 2.253939  | -0.127149 |
| 6                | 6                | 0              | 4.625423                | 2.903637  | -0.350482 |
| 7                | 1                | 0              | 6.822127                | 2.753543  | -0.225088 |
| 8                | 1                | 0              | 6.872946                | 0.316748  | -0.323413 |
| 9                | 6                | 0              | 2.172102                | 0.025709  | 0.074093  |
| 10               | 1                | 0              | 2.532330                | 2.794959  | -0.141650 |
| 11               | 1                | 0              | 4.630863                | 3.969560  | -0.557832 |
| 12               | 6                | 0              | 2.293473                | -1.373316 | -0.024039 |
| 13               | 6                | 0              | 3.530824                | -2.013556 | -0.056816 |
| 14               | 1                | 0              | 1.417267                | -2.010354 | -0.012684 |
| 15               | 1                | 0              | 3.598449                | -3.093150 | 0.012066  |
| 16               | 6                | 0              | 5.957434                | -2.105061 | -0.217773 |
| 17               | 6                | 0              | 6.650683                | -2.151766 | 1.146618  |
| 18               | 1                | 0              | 6.607168                | -1.667239 | -0.978938 |
| 19               | 1                | 0              | 5.721875                | -3.118240 | -0.552261 |
| 20               | 1                | 0              | 7.579637                | -2.723563 | 1.063653  |
| 21               | 1                | 0              | 6.893835                | -1.150662 | 1.511611  |
| 22               | 1                | 0              | 6.009369                | -2.639906 | 1.885706  |
| 23               | 7                | 0              | 4.694220                | -1.350016 | -0.190210 |
| 24               | 6                | 0              | 0.915357                | 0.658772  | 0.155648  |
| 25               | 6                | 0              | -0.352904               | 0.079107  | 0.015061  |
| 26               | 1                | 0              | 0.912931                | 1.726706  | 0.360103  |
| 27               | 1                | 0              | -0.443965               | -0.978582 | -0.213507 |

|    |    |   |           |           |           |
|----|----|---|-----------|-----------|-----------|
| 28 | 6  | 0 | -1.520153 | 0.848257  | 0.162358  |
| 29 | 1  | 0 | -1.400310 | 1.906694  | 0.374074  |
| 30 | 6  | 0 | -2.825032 | 0.368348  | 0.066482  |
| 31 | 6  | 0 | -4.944310 | -0.950014 | -0.153546 |
| 32 | 6  | 0 | -5.153833 | 0.424059  | 0.091403  |
| 33 | 6  | 0 | -6.010201 | -1.835259 | -0.299100 |
| 34 | 6  | 0 | -6.461661 | 0.920157  | 0.199162  |
| 35 | 6  | 0 | -7.305894 | -1.332442 | -0.194474 |
| 36 | 1  | 0 | -5.832601 | -2.888270 | -0.487620 |
| 37 | 6  | 0 | -7.522240 | 0.031785  | 0.053175  |
| 38 | 1  | 0 | -6.654400 | 1.967553  | 0.395231  |
| 39 | 1  | 0 | -8.151387 | -2.002950 | -0.303878 |
| 40 | 1  | 0 | -8.536762 | 0.407251  | 0.135319  |
| 41 | 7  | 0 | -3.964057 | 1.134522  | 0.198923  |
| 42 | 16 | 0 | -3.227500 | -1.321532 | -0.234239 |
| 43 | 6  | 0 | -3.887959 | 2.575608  | 0.442005  |
| 44 | 1  | 0 | -3.453510 | 2.772548  | 1.425412  |
| 45 | 1  | 0 | -3.279014 | 3.050296  | -0.330190 |
| 46 | 1  | 0 | -4.886147 | 3.002265  | 0.404264  |
| 47 | 1  | 0 | 3.761414  | 0.726871  | 1.318430  |
| 48 | 1  | 0 | 4.378614  | 0.138567  | -1.605746 |

002gde\_mol\_TDb3lyp631dp\_+1H2\_ARA\_PCMw\_opt\_rot1.log

Standard orientation:

| Center<br>Number | Atomic<br>Number | Atomic<br>Type | Coordinates (Angstroms) |           |           |
|------------------|------------------|----------------|-------------------------|-----------|-----------|
|                  |                  |                | X                       | Y         | Z         |
| 1                | 6                | 0              | 4.865843                | 2.285021  | -1.539924 |
| 2                | 6                | 0              | 5.285003                | 1.048758  | -1.219735 |
| 3                | 6                | 0              | 4.530387                | 0.263354  | -0.166975 |
| 4                | 6                | 0              | 3.013212                | 0.519360  | -0.318908 |
| 5                | 6                | 0              | 2.758432                | 2.014202  | -0.356616 |
| 6                | 6                | 0              | 3.639522                | 2.832085  | -0.956098 |
| 7                | 1                | 0              | 5.437800                | 2.898449  | -2.230448 |
| 8                | 1                | 0              | 6.206289                | 0.658021  | -1.635604 |
| 9                | 6                | 0              | 2.239383                | -0.256065 | 0.733441  |
| 10               | 1                | 0              | 1.817355                | 2.394249  | 0.029636  |
| 11               | 1                | 0              | 3.440063                | 3.895876  | -1.049197 |
| 12               | 6                | 0              | 2.772626                | -1.468908 | 1.135992  |
| 13               | 6                | 0              | 3.992791                | -1.938781 | 0.651918  |
| 14               | 1                | 0              | 2.222567                | -2.111314 | 1.815848  |
| 15               | 1                | 0              | 4.348917                | -2.930820 | 0.895015  |
| 16               | 6                | 0              | 6.177728                | -1.665446 | -0.361993 |
| 17               | 6                | 0              | 7.159834                | -1.230211 | 0.730575  |
| 18               | 1                | 0              | 6.533634                | -1.346563 | -1.344610 |
| 19               | 1                | 0              | 6.123380                | -2.756970 | -0.400137 |
| 20               | 1                | 0              | 8.144484                | -1.669329 | 0.543666  |
| 21               | 1                | 0              | 7.279231                | -0.142970 | 0.759533  |
| 22               | 1                | 0              | 6.817064                | -1.563328 | 1.715226  |
| 23               | 7                | 0              | 4.801629                | -1.186930 | -0.172752 |
| 24               | 6                | 0              | 0.929227                | 0.220034  | 1.215170  |
| 25               | 6                | 0              | -0.261770               | -0.064330 | 0.602742  |
| 26               | 1                | 0              | 0.891365                | 0.842888  | 2.113123  |
| 27               | 1                | 0              | -0.248240               | -0.682102 | -0.292678 |
| 28               | 6                | 0              | -1.497663               | 0.406414  | 1.099007  |
| 29               | 1                | 0              | -1.484273               | 1.018745  | 1.993391  |
| 30               | 6                | 0              | -2.742027               | 0.132363  | 0.518880  |
| 31               | 6                | 0              | -4.690049               | -0.627882 | -0.835523 |
| 32               | 6                | 0              | -5.044452               | 0.177772  | 0.265566  |
| 33               | 6                | 0              | -5.654655               | -1.144321 | -1.702049 |
| 34               | 6                | 0              | -6.391616               | 0.475819  | 0.515750  |
| 35               | 6                | 0              | -6.987159               | -0.841930 | -1.447176 |
| 36               | 1                | 0              | -5.370280               | -1.762046 | -2.545843 |
| 37               | 6                | 0              | -7.347145               | -0.040758 | -0.348662 |

|    |    |   |           |           |           |
|----|----|---|-----------|-----------|-----------|
| 38 | 1  | 0 | -6.691726 | 1.088003  | 1.356497  |
| 39 | 1  | 0 | -7.757684 | -1.230118 | -2.103976 |
| 40 | 1  | 0 | -8.393475 | 0.180076  | -0.168963 |
| 41 | 7  | 0 | -3.931245 | 0.589212  | 0.997044  |
| 42 | 16 | 0 | -2.955651 | -0.849240 | -0.914408 |
| 43 | 6  | 0 | -4.008600 | 1.442008  | 2.191794  |
| 44 | 1  | 0 | -3.662706 | 0.887941  | 3.065908  |
| 45 | 1  | 0 | -3.399079 | 2.334561  | 2.045924  |
| 46 | 1  | 0 | -5.038784 | 1.745333  | 2.347894  |
| 47 | 1  | 0 | 4.819634  | 0.667220  | 0.823882  |
| 48 | 1  | 0 | 2.729081  | 0.124709  | -1.316667 |

002geb\_mol\_b3lyp631dp\_+5H2\_ARA\_PCMw.log

Standard orientation:

| Center<br>Number | Atomic<br>Number | Atomic<br>Type | Coordinates (Angstroms) |           |           |
|------------------|------------------|----------------|-------------------------|-----------|-----------|
|                  |                  |                | X                       | Y         | Z         |
| 1                | 6                | 0              | 4.777846                | 2.923527  | -0.618970 |
| 2                | 6                | 0              | 5.388508                | 1.625225  | -0.068866 |
| 3                | 6                | 0              | 4.403102                | 0.475834  | -0.053148 |
| 4                | 6                | 0              | 3.075047                | 0.595851  | -0.219241 |
| 5                | 6                | 0              | 2.475039                | 1.958580  | -0.518982 |
| 6                | 6                | 0              | 3.359009                | 3.133550  | -0.100706 |
| 7                | 1                | 0              | 5.430183                | 3.760849  | -0.352343 |
| 8                | 1                | 0              | 6.260008                | 1.383695  | -0.681374 |
| 9                | 6                | 0              | 2.071887                | -0.558521 | -0.180912 |
| 10               | 1                | 0              | 2.268543                | 2.005750  | -1.598667 |
| 11               | 1                | 0              | 3.370644                | 3.212985  | 0.993894  |
| 12               | 6                | 0              | 2.726971                | -1.854074 | 0.321299  |
| 13               | 6                | 0              | 4.132854                | -2.017267 | -0.215087 |
| 14               | 1                | 0              | 2.752365                | -1.862450 | 1.418032  |
| 15               | 1                | 0              | 4.169579                | -1.986786 | -1.306439 |
| 16               | 6                | 0              | 6.446513                | -1.057186 | -0.204709 |
| 17               | 6                | 0              | 7.054164                | -2.398339 | 0.183127  |
| 18               | 1                | 0              | 7.019214                | -0.255834 | 0.255286  |
| 19               | 1                | 0              | 6.433585                | -0.909714 | -1.285989 |
| 20               | 1                | 0              | 8.123444                | -2.347554 | -0.038253 |
| 21               | 1                | 0              | 6.950030                | -2.597088 | 1.254224  |
| 22               | 1                | 0              | 6.641941                | -3.237412 | -0.379331 |
| 23               | 7                | 0              | 5.005970                | -0.881447 | 0.270191  |
| 24               | 6                | 0              | 0.844390                | -0.249469 | 0.643558  |
| 25               | 6                | 0              | -0.419481               | -0.299511 | 0.174095  |
| 26               | 1                | 0              | 1.019670                | -0.016075 | 1.694427  |
| 27               | 1                | 0              | -0.556169               | -0.541407 | -0.881421 |
| 28               | 6                | 0              | -1.609456               | -0.059534 | 0.953887  |
| 29               | 1                | 0              | -1.479311               | 0.180611  | 2.004222  |
| 30               | 6                | 0              | -2.878147               | -0.108870 | 0.458842  |
| 31               | 6                | 0              | -5.016854               | -0.290057 | -0.899127 |
| 32               | 6                | 0              | -5.228621               | 0.030620  | 0.455148  |
| 33               | 6                | 0              | -6.073066               | -0.425530 | -1.791542 |
| 34               | 6                | 0              | -6.534614               | 0.223562  | 0.917866  |
| 35               | 6                | 0              | -7.377327               | -0.234089 | -1.321991 |
| 36               | 1                | 0              | -5.887936               | -0.673893 | -2.831543 |
| 37               | 6                | 0              | -7.596948               | 0.087286  | 0.019471  |
| 38               | 1                | 0              | -6.733367               | 0.477061  | 1.952488  |
| 39               | 1                | 0              | -8.214705               | -0.335290 | -2.004401 |
| 40               | 1                | 0              | -8.609878               | 0.237226  | 0.379763  |
| 41               | 7                | 0              | -4.042831               | 0.115887  | 1.184378  |
| 42               | 16               | 0              | -3.288872               | -0.476247 | -1.242331 |
| 43               | 6                | 0              | -3.969063               | 0.424609  | 2.604882  |
| 44               | 1                | 0              | -3.445652               | -0.374431 | 3.139233  |
| 45               | 1                | 0              | -3.435630               | 1.366853  | 2.768321  |
| 46               | 1                | 0              | -4.971808               | 0.515046  | 3.015184  |
| 47               | 1                | 0              | 4.582676                | -2.944393 | 0.133843  |

|    |   |   |          |           |           |
|----|---|---|----------|-----------|-----------|
| 48 | 1 | 0 | 2.132701 | -2.719744 | 0.017011  |
| 49 | 1 | 0 | 1.746804 | -0.712193 | -1.220983 |
| 50 | 1 | 0 | 1.499028 | 2.018388  | -0.029612 |
| 51 | 1 | 0 | 2.939352 | 4.069059  | -0.484641 |
| 52 | 1 | 0 | 4.757047 | 2.871738  | -1.714522 |
| 53 | 1 | 0 | 5.765621 | 1.788459  | 0.951481  |
| 54 | 1 | 0 | 5.041477 | -0.951764 | 1.294070  |

-----  
002gfa\_mol\_b3lyp631dp\_+6H2\_ARA\_PCMw.log

Standard orientation:

| Center<br>Number | Atomic<br>Number | Atomic<br>Type | Coordinates (Angstroms) |           |           |
|------------------|------------------|----------------|-------------------------|-----------|-----------|
|                  |                  |                | X                       | Y         | Z         |
| 1                | 6                | 0              | 6.395838                | 0.330401  | 0.543824  |
| 2                | 6                | 0              | 5.194957                | -0.525250 | 0.998335  |
| 3                | 6                | 0              | 4.124657                | -0.458894 | -0.092104 |
| 4                | 6                | 0              | 3.637409                | 0.990762  | -0.289471 |
| 5                | 6                | 0              | 4.825351                | 1.833060  | -0.787359 |
| 6                | 6                | 0              | 5.993574                | 1.774777  | 0.209880  |
| 7                | 1                | 0              | 7.158307                | 0.319207  | 1.329176  |
| 8                | 1                | 0              | 5.530281                | -1.551804 | 1.168767  |
| 9                | 6                | 0              | 2.353500                | 1.078677  | -1.182470 |
| 10               | 1                | 0              | 5.148271                | 1.469676  | -1.772728 |
| 11               | 1                | 0              | 5.697029                | 2.289572  | 1.133467  |
| 12               | 6                | 0              | 2.251078                | -0.180651 | -2.061863 |
| 13               | 6                | 0              | 2.170315                | -1.471618 | -1.233249 |
| 14               | 1                | 0              | 1.376885                | -0.138304 | -2.717106 |
| 15               | 1                | 0              | 2.647793                | -2.305551 | -1.750070 |
| 16               | 6                | 0              | 3.097967                | -2.707776 | 0.727984  |
| 17               | 6                | 0              | 3.011918                | -2.701223 | 2.247649  |
| 18               | 1                | 0              | 4.056594                | -3.075517 | 0.358901  |
| 19               | 1                | 0              | 2.314764                | -3.346502 | 0.316864  |
| 20               | 1                | 0              | 3.129963                | -3.729240 | 2.600134  |
| 21               | 1                | 0              | 3.786869                | -2.094094 | 2.716653  |
| 22               | 1                | 0              | 2.033215                | -2.346237 | 2.584952  |
| 23               | 7                | 0              | 2.884345                | -1.336613 | 0.107999  |
| 24               | 6                | 0              | 1.125081                | 1.350400  | -0.336140 |
| 25               | 6                | 0              | -0.120168               | 0.853259  | -0.509146 |
| 26               | 1                | 0              | 1.275942                | 2.076246  | 0.464049  |
| 27               | 1                | 0              | -0.297206               | 0.149829  | -1.322433 |
| 28               | 6                | 0              | -1.263378               | 1.201323  | 0.299646  |
| 29               | 1                | 0              | -1.109993               | 1.919704  | 1.098422  |
| 30               | 6                | 0              | -2.516427               | 0.694725  | 0.122658  |
| 31               | 6                | 0              | -4.647212               | -0.488161 | -0.592205 |
| 32               | 6                | 0              | -4.819175               | 0.382603  | 0.500332  |
| 33               | 6                | 0              | -5.706452               | -1.215903 | -1.120324 |
| 34               | 6                | 0              | -6.088488               | 0.524506  | 1.070928  |
| 35               | 6                | 0              | -6.973264               | -1.071055 | -0.543952 |
| 36               | 1                | 0              | -5.552706               | -1.882044 | -1.963059 |
| 37               | 6                | 0              | -7.153796               | -0.207910 | 0.539360  |
| 38               | 1                | 0              | -6.257166               | 1.188971  | 1.910170  |
| 39               | 1                | 0              | -7.812589               | -1.630862 | -0.943014 |
| 40               | 1                | 0              | -8.138351               | -0.096969 | 0.982790  |
| 41               | 7                | 0              | -3.636106               | 1.015953  | 0.881022  |
| 42               | 16               | 0              | -2.961604               | -0.493019 | -1.137360 |
| 43               | 6                | 0              | -3.525956               | 1.964806  | 1.979516  |
| 44               | 1                | 0              | -2.788711               | 1.616547  | 2.709703  |
| 45               | 1                | 0              | -3.219126               | 2.948534  | 1.609399  |
| 46               | 1                | 0              | -4.486659               | 2.063816  | 2.478635  |
| 47               | 1                | 0              | 1.145357                | -1.754329 | -0.994066 |
| 48               | 1                | 0              | 3.121835                | -0.219810 | -2.721996 |
| 49               | 1                | 0              | 2.494371                | 1.935564  | -1.857059 |
| 50               | 1                | 0              | 3.375528                | 1.369409  | 0.708214  |
| 51               | 1                | 0              | 4.496892                | 2.868943  | -0.925522 |

|    |   |   |          |           |           |
|----|---|---|----------|-----------|-----------|
| 52 | 1 | 0 | 6.856616 | 2.318895  | -0.188759 |
| 53 | 1 | 0 | 6.848720 | -0.138687 | -0.339472 |
| 54 | 1 | 0 | 4.799252 | -0.138184 | 1.944356  |
| 55 | 1 | 0 | 4.566747 | -0.842656 | -1.017634 |
| 56 | 1 | 0 | 2.245314 | -0.816352 | 0.721901  |

-----  
002gfb\_mol\_b3lyp631dp\_+6H2\_ARA\_PCMw.log

Standard orientation:

| Center<br>Number | Atomic<br>Number | Atomic<br>Type | Coordinates (Angstroms) |           |           |
|------------------|------------------|----------------|-------------------------|-----------|-----------|
|                  |                  |                | X                       | Y         | Z         |
| 1                | 6                | 0              | 4.712707                | 2.961566  | -0.554313 |
| 2                | 6                | 0              | 5.349163                | 1.622149  | -0.147033 |
| 3                | 6                | 0              | 4.383366                | 0.451458  | -0.390634 |
| 4                | 6                | 0              | 3.032323                | 0.663407  | 0.331627  |
| 5                | 6                | 0              | 2.427142                | 2.012035  | -0.106429 |
| 6                | 6                | 0              | 3.371326                | 3.190322  | 0.145159  |
| 7                | 1                | 0              | 5.417532                | 3.767934  | -0.326976 |
| 8                | 1                | 0              | 6.270443                | 1.493638  | -0.718410 |
| 9                | 6                | 0              | 2.042756                | -0.510073 | 0.106363  |
| 10               | 1                | 0              | 2.179624                | 1.959578  | -1.176233 |
| 11               | 1                | 0              | 3.533674                | 3.307174  | 1.225128  |
| 12               | 6                | 0              | 2.726961                | -1.835702 | 0.486984  |
| 13               | 6                | 0              | 4.053542                | -2.037651 | -0.227405 |
| 14               | 1                | 0              | 2.883179                | -1.878150 | 1.572759  |
| 15               | 1                | 0              | 3.932496                | -2.084478 | -1.312756 |
| 16               | 6                | 0              | 6.373686                | -1.145135 | -0.582922 |
| 17               | 6                | 0              | 7.029463                | -2.441714 | -0.126006 |
| 18               | 1                | 0              | 7.000935                | -0.303866 | -0.299292 |
| 19               | 1                | 0              | 6.224788                | -1.120101 | -1.664527 |
| 20               | 1                | 0              | 8.058606                | -2.436568 | -0.494550 |
| 21               | 1                | 0              | 7.071160                | -2.510609 | 0.965313  |
| 22               | 1                | 0              | 6.543401                | -3.334314 | -0.522803 |
| 23               | 7                | 0              | 5.008337                | -0.891659 | 0.039260  |
| 24               | 6                | 0              | 0.763579                | -0.337294 | 0.881397  |
| 25               | 6                | 0              | -0.469833               | -0.317666 | 0.335062  |
| 26               | 1                | 0              | 0.867625                | -0.249749 | 1.964492  |
| 27               | 1                | 0              | -0.543702               | -0.409970 | -0.749991 |
| 28               | 6                | 0              | -1.705709               | -0.185730 | 1.069859  |
| 29               | 1                | 0              | -1.637907               | -0.097183 | 2.149486  |
| 30               | 6                | 0              | -2.943144               | -0.163537 | 0.501155  |
| 31               | 6                | 0              | -5.001284               | -0.171450 | -0.988428 |
| 32               | 6                | 0              | -5.292103               | -0.038375 | 0.382716  |
| 33               | 6                | 0              | -6.004823               | -0.195049 | -1.948905 |
| 34               | 6                | 0              | -6.624998               | 0.073227  | 0.792763  |
| 35               | 6                | 0              | -7.336172               | -0.083010 | -1.532334 |
| 36               | 1                | 0              | -5.759302               | -0.298230 | -3.000862 |
| 37               | 6                | 0              | -7.634272               | 0.049328  | -0.174246 |
| 38               | 1                | 0              | -6.884791               | 0.176943  | 1.839699  |
| 39               | 1                | 0              | -8.133031               | -0.099340 | -2.268472 |
| 40               | 1                | 0              | -8.667991               | 0.136042  | 0.145570  |
| 41               | 7                | 0              | -4.149857               | -0.036447 | 1.182262  |
| 42               | 16               | 0              | -3.253971               | -0.294660 | -1.255622 |
| 43               | 6                | 0              | -4.157957               | 0.088454  | 2.632119  |
| 44               | 1                | 0              | -3.702345               | -0.793088 | 3.094767  |
| 45               | 1                | 0              | -3.599644               | 0.977614  | 2.942640  |
| 46               | 1                | 0              | -5.180872               | 0.178419  | 2.989189  |
| 47               | 1                | 0              | 4.540525                | -2.950842 | 0.109480  |
| 48               | 1                | 0              | 2.082135                | -2.682215 | 0.232482  |
| 49               | 1                | 0              | 1.800975                | -0.545040 | -0.965660 |
| 50               | 1                | 0              | 3.243346                | 0.725511  | 1.411176  |
| 51               | 1                | 0              | 1.480936                | 2.152560  | 0.423431  |
| 52               | 1                | 0              | 2.913372                | 4.120867  | -0.207740 |
| 53               | 1                | 0              | 4.564619                | 2.971026  | -1.642182 |

|    |   |   |          |           |           |
|----|---|---|----------|-----------|-----------|
| 54 | 1 | 0 | 5.622264 | 1.652525  | 0.916244  |
| 55 | 1 | 0 | 4.210811 | 0.332045  | -1.466443 |
| 56 | 1 | 0 | 5.147000 | -0.844181 | 1.055056  |

002haa\_mol\_b3lyp631dp\_+1H2\_ARBb\_PCMw.log

Standard orientation:

| Center<br>Number | Atomic<br>Number | Atomic<br>Type | Coordinates (Angstroms) |           |           |
|------------------|------------------|----------------|-------------------------|-----------|-----------|
|                  |                  |                | X                       | Y         | Z         |
| 1                | 6                | 0              | 6.062990                | 2.091978  | -0.157010 |
| 2                | 6                | 0              | 5.998338                | 0.712559  | -0.183575 |
| 3                | 6                | 0              | 4.748769                | 0.054409  | -0.169364 |
| 4                | 6                | 0              | 3.539769                | 0.816968  | -0.119573 |
| 5                | 6                | 0              | 3.658967                | 2.228448  | -0.095593 |
| 6                | 6                | 0              | 4.886328                | 2.858506  | -0.113685 |
| 7                | 1                | 0              | 7.032127                | 2.579579  | -0.169603 |
| 8                | 1                | 0              | 6.917707                | 0.144730  | -0.212728 |
| 9                | 6                | 0              | 2.246588                | 0.144811  | -0.096843 |
| 10               | 1                | 0              | 2.765995                | 2.838301  | -0.064059 |
| 11               | 1                | 0              | 4.940575                | 3.941592  | -0.094241 |
| 12               | 6                | 0              | 2.289692                | -1.269108 | -0.137780 |
| 13               | 6                | 0              | 3.477981                | -1.949612 | -0.190943 |
| 14               | 1                | 0              | 1.383927                | -1.859840 | -0.128183 |
| 15               | 1                | 0              | 3.501605                | -3.031787 | -0.220556 |
| 16               | 6                | 0              | 5.901687                | -2.181168 | -0.215856 |
| 17               | 6                | 0              | 6.506171                | -2.365274 | 1.175731  |
| 18               | 1                | 0              | 6.616711                | -1.746780 | -0.915941 |
| 19               | 1                | 0              | 5.604218                | -3.144830 | -0.631398 |
| 20               | 1                | 0              | 7.389004                | -3.006147 | 1.100553  |
| 21               | 1                | 0              | 6.811612                | -1.413770 | 1.617640  |
| 22               | 1                | 0              | 5.789591                | -2.844528 | 1.848209  |
| 23               | 7                | 0              | 4.683222                | -1.335781 | -0.208450 |
| 24               | 6                | 0              | 1.026282                | 0.870594  | -0.036298 |
| 25               | 6                | 0              | -0.240754               | 0.314466  | -0.022800 |
| 26               | 1                | 0              | 1.074864                | 1.952233  | 0.005302  |
| 27               | 1                | 0              | -0.341389               | -0.767497 | -0.069047 |
| 28               | 6                | 0              | -1.426538               | 1.062251  | 0.056749  |
| 29               | 1                | 0              | -1.346495               | 2.140621  | 0.142502  |
| 30               | 6                | 0              | -2.699833               | 0.503897  | 0.028713  |
| 31               | 6                | 0              | -4.743597               | -1.001458 | 0.233720  |
| 32               | 6                | 0              | -5.051323               | 0.428981  | -0.178388 |
| 33               | 6                | 0              | -5.807735               | -1.927306 | -0.290838 |
| 34               | 6                | 0              | -6.400320               | 0.802575  | 0.387431  |
| 35               | 6                | 0              | -7.075138               | -1.478627 | -0.212987 |
| 36               | 1                | 0              | -5.565273               | -2.936721 | -0.604207 |
| 37               | 6                | 0              | -7.364815               | -0.133862 | 0.303356  |
| 38               | 1                | 0              | -6.611017               | 1.806556  | 0.738271  |
| 39               | 1                | 0              | -7.905739               | -2.119270 | -0.493321 |
| 40               | 1                | 0              | -8.381945               | 0.097525  | 0.604462  |
| 41               | 7                | 0              | -3.856228               | 1.192106  | 0.214003  |
| 42               | 16               | 0              | -2.999644               | -1.220718 | -0.307603 |
| 43               | 6                | 0              | -3.865165               | 2.651629  | 0.279291  |
| 44               | 1                | 0              | -3.182044               | 2.990958  | 1.060441  |
| 45               | 1                | 0              | -3.569956               | 3.098207  | -0.677490 |
| 46               | 1                | 0              | -4.865586               | 2.994336  | 0.534912  |
| 47               | 1                | 0              | -5.131160               | 0.463828  | -1.282688 |
| 48               | 1                | 0              | -4.732046               | -1.054028 | 1.333198  |

002haa\_mol\_TDb3lyp631dp\_+1H2\_ARBb\_PCMw\_opt.log

Standard orientation:

| Center | Atomic | Atomic | Coordinates (Angstroms) |  |  |
|--------|--------|--------|-------------------------|--|--|
|--------|--------|--------|-------------------------|--|--|

| Number | Number | Type | X         | Y         | Z         |
|--------|--------|------|-----------|-----------|-----------|
| 1      | 6      | 0    | 5.994280  | 2.159556  | -0.443255 |
| 2      | 6      | 0    | 5.983595  | 0.771302  | -0.341195 |
| 3      | 6      | 0    | 4.769280  | 0.073926  | -0.204035 |
| 4      | 6      | 0    | 3.524801  | 0.798172  | -0.146522 |
| 5      | 6      | 0    | 3.585710  | 2.205647  | -0.276044 |
| 6      | 6      | 0    | 4.793725  | 2.876371  | -0.416649 |
| 7      | 1      | 0    | 6.941569  | 2.677822  | -0.548590 |
| 8      | 1      | 0    | 6.923918  | 0.238533  | -0.369357 |
| 9      | 6      | 0    | 2.286347  | 0.073896  | 0.022797  |
| 10     | 1      | 0    | 2.667961  | 2.779951  | -0.278447 |
| 11     | 1      | 0    | 4.800831  | 3.957663  | -0.508434 |
| 12     | 6      | 0    | 2.359411  | -1.338042 | 0.086699  |
| 13     | 6      | 0    | 3.563414  | -1.990406 | 0.013307  |
| 14     | 1      | 0    | 1.469230  | -1.937375 | 0.228840  |
| 15     | 1      | 0    | 3.637436  | -3.068316 | 0.069603  |
| 16     | 6      | 0    | 5.989424  | -2.114463 | -0.162873 |
| 17     | 6      | 0    | 6.684877  | -2.186080 | 1.198503  |
| 18     | 1      | 0    | 6.646759  | -1.698276 | -0.928738 |
| 19     | 1      | 0    | 5.711283  | -3.115155 | -0.497825 |
| 20     | 1      | 0    | 7.590740  | -2.792159 | 1.107422  |
| 21     | 1      | 0    | 6.970206  | -1.195644 | 1.561151  |
| 22     | 1      | 0    | 6.031914  | -2.652008 | 1.941505  |
| 23     | 7      | 0    | 4.744519  | -1.318238 | -0.132509 |
| 24     | 6      | 0    | 1.020090  | 0.756631  | 0.152311  |
| 25     | 6      | 0    | -0.236820 | 0.185747  | 0.037787  |
| 26     | 1      | 0    | 1.048487  | 1.817722  | 0.380780  |
| 27     | 1      | 0    | -0.328247 | -0.863902 | -0.227803 |
| 28     | 6      | 0    | -1.420240 | 0.931875  | 0.252686  |
| 29     | 1      | 0    | -1.311648 | 1.978225  | 0.519682  |
| 30     | 6      | 0    | -2.719376 | 0.426253  | 0.140998  |
| 31     | 6      | 0    | -4.810864 | -1.013872 | 0.118403  |
| 32     | 6      | 0    | -5.056519 | 0.465843  | -0.135032 |
| 33     | 6      | 0    | -5.879643 | -1.836560 | -0.548987 |
| 34     | 6      | 0    | -6.417849 | 0.820560  | 0.411737  |
| 35     | 6      | 0    | -7.134413 | -1.354694 | -0.469905 |
| 36     | 1      | 0    | -5.653822 | -2.811455 | -0.966593 |
| 37     | 6      | 0    | -7.404966 | -0.066898 | 0.184235  |
| 38     | 1      | 0    | -6.612134 | 1.786452  | 0.864122  |
| 39     | 1      | 0    | -7.971422 | -1.929529 | -0.854321 |
| 40     | 1      | 0    | -8.426611 | 0.164604  | 0.469430  |
| 41     | 7      | 0    | -3.859381 | 1.138181  | 0.387219  |
| 42     | 16     | 0    | -3.052318 | -1.233746 | -0.379879 |
| 43     | 6      | 0    | -3.825312 | 2.582368  | 0.591502  |
| 44     | 1      | 0    | -3.143722 | 2.826614  | 1.409058  |
| 45     | 1      | 0    | -3.503802 | 3.110224  | -0.315671 |
| 46     | 1      | 0    | -4.818758 | 2.928931  | 0.868811  |
| 47     | 1      | 0    | -5.083731 | 0.629959  | -1.232490 |
| 48     | 1      | 0    | -4.839027 | -1.195337 | 1.204155  |

002hac\_mol\_TDb3lyp631dp\_+1H2\_ARBb\_PCMw\_opt\_TRIPLET.log

Standard orientation:

| Center Number | Atomic Number | Atomic Type | Coordinates (Angstroms) |          |           |
|---------------|---------------|-------------|-------------------------|----------|-----------|
|               |               |             | X                       | Y        | Z         |
| 1             | 6             | 0           | 6.016271                | 2.196731 | -0.086995 |
| 2             | 6             | 0           | 6.001676                | 0.810350 | -0.156488 |
| 3             | 6             | 0           | 4.784135                | 0.105359 | -0.167660 |
| 4             | 6             | 0           | 3.539523                | 0.813739 | -0.098888 |
| 5             | 6             | 0           | 3.604012                | 2.222099 | -0.030123 |
| 6             | 6             | 0           | 4.811412                | 2.904784 | -0.024744 |
| 7             | 1             | 0           | 6.965475                | 2.721713 | -0.079842 |
| 8             | 1             | 0           | 6.943164                | 0.280265 | -0.198144 |



|    |    |   |           |           |           |
|----|----|---|-----------|-----------|-----------|
| 9  | 6  | 0 | 2.285303  | 0.069560  | -0.102319 |
| 10 | 1  | 0 | 2.688541  | 2.798331  | 0.020642  |
| 11 | 1  | 0 | 4.815732  | 3.988499  | 0.029596  |
| 12 | 6  | 0 | 2.381678  | -1.348027 | -0.177930 |
| 13 | 6  | 0 | 3.591823  | -1.980720 | -0.247234 |
| 14 | 1  | 0 | 1.494486  | -1.967189 | -0.187540 |
| 15 | 1  | 0 | 3.672178  | -3.058016 | -0.307057 |
| 16 | 6  | 0 | 6.027005  | -2.079167 | -0.285142 |
| 17 | 6  | 0 | 6.636752  | -2.290018 | 1.102039  |
| 18 | 1  | 0 | 6.725970  | -1.585188 | -0.962124 |
| 19 | 1  | 0 | 5.779106  | -3.039926 | -0.739054 |
| 20 | 1  | 0 | 7.549212  | -2.885250 | 1.007065  |
| 21 | 1  | 0 | 6.894352  | -1.342344 | 1.581140  |
| 22 | 1  | 0 | 5.940823  | -2.827852 | 1.751617  |
| 23 | 7  | 0 | 4.775002  | -1.294743 | -0.250510 |
| 24 | 6  | 0 | 1.021861  | 0.710695  | -0.033390 |
| 25 | 6  | 0 | -0.247188 | 0.110561  | -0.025025 |
| 26 | 1  | 0 | 1.016902  | 1.795217  | 0.020361  |
| 27 | 1  | 0 | -0.344160 | -0.969258 | -0.068201 |
| 28 | 6  | 0 | -1.407089 | 0.894211  | 0.045921  |
| 29 | 1  | 0 | -1.282614 | 1.971219  | 0.105001  |
| 30 | 6  | 0 | -2.722843 | 0.403757  | 0.035681  |
| 31 | 6  | 0 | -4.836907 | -0.972516 | 0.300569  |
| 32 | 6  | 0 | -5.064720 | 0.444080  | -0.204727 |
| 33 | 6  | 0 | -5.936763 | -1.875959 | -0.187626 |
| 34 | 6  | 0 | -6.405948 | 0.919491  | 0.298207  |
| 35 | 6  | 0 | -7.180912 | -1.361422 | -0.170083 |
| 36 | 1  | 0 | -5.738226 | -2.914351 | -0.428714 |
| 37 | 6  | 0 | -7.413520 | 0.027218  | 0.250293  |
| 38 | 1  | 0 | -6.574291 | 1.954085  | 0.574632  |
| 39 | 1  | 0 | -8.036696 | -1.977432 | -0.428793 |
| 40 | 1  | 0 | -8.424192 | 0.327842  | 0.508789  |
| 41 | 7  | 0 | -3.842279 | 1.174185  | 0.165513  |
| 42 | 16 | 0 | -3.096089 | -1.316350 | -0.188709 |
| 43 | 6  | 0 | -3.784579 | 2.633238  | 0.124383  |
| 44 | 1  | 0 | -3.055758 | 2.996667  | 0.850519  |
| 45 | 1  | 0 | -3.515153 | 2.995300  | -0.874872 |
| 46 | 1  | 0 | -4.756846 | 3.037986  | 0.397420  |
| 47 | 1  | 0 | -5.111400 | 0.414699  | -1.311875 |
| 48 | 1  | 0 | -4.844135 | -0.957780 | 1.401436  |

-----

002had\_mol\_TDb3lyp631dp\_+1H2\_ARBb\_PCMw\_opt\_rot.log

Standard orientation:

| Center<br>Number | Atomic<br>Number | Atomic<br>Type | Coordinates (Angstroms) |           |           |
|------------------|------------------|----------------|-------------------------|-----------|-----------|
|                  |                  |                | X                       | Y         | Z         |
| 1                | 6                | 0              | -5.055949               | -1.859908 | 1.949951  |
| 2                | 6                | 0              | -5.370708               | -0.794551 | 1.113786  |
| 3                | 6                | 0              | -4.416675               | -0.264801 | 0.226369  |
| 4                | 6                | 0              | -3.093383               | -0.815231 | 0.185389  |
| 5                | 6                | 0              | -2.822068               | -1.899482 | 1.050518  |
| 6                | 6                | 0              | -3.775385               | -2.417004 | 1.916168  |
| 7                | 1                | 0              | -5.810988               | -2.250263 | 2.624378  |
| 8                | 1                | 0              | -6.366250               | -0.374252 | 1.158706  |
| 9                | 6                | 0              | -2.099979               | -0.256863 | -0.724196 |
| 10               | 1                | 0              | -1.838057               | -2.351575 | 1.042946  |
| 11               | 1                | 0              | -3.520967               | -3.250526 | 2.562857  |
| 12               | 6                | 0              | -2.532444               | 0.825226  | -1.543188 |
| 13               | 6                | 0              | -3.802246               | 1.312040  | -1.477107 |
| 14               | 1                | 0              | -1.854166               | 1.294485  | -2.244298 |
| 15               | 1                | 0              | -4.133280               | 2.134665  | -2.097454 |
| 16               | 6                | 0              | -6.078816               | 1.430150  | -0.599114 |
| 17               | 6                | 0              | -6.238296               | 2.454445  | 0.526476  |
| 18               | 1                | 0              | -6.839991               | 0.649159  | -0.536445 |

|    |    |   |           |           |           |
|----|----|---|-----------|-----------|-----------|
| 19 | 1  | 0 | -6.214996 | 1.914762  | -1.568071 |
| 20 | 1  | 0 | -7.240127 | 2.892003  | 0.486049  |
| 21 | 1  | 0 | -6.104590 | 1.998383  | 1.510830  |
| 22 | 1  | 0 | -5.506786 | 3.260689  | 0.419980  |
| 23 | 7  | 0 | -4.750591 | 0.795546  | -0.627373 |
| 24 | 6  | 0 | -0.761702 | -0.757250 | -0.792726 |
| 25 | 6  | 0 | 0.239532  | -0.327100 | -1.618346 |
| 26 | 1  | 0 | -0.501147 | -1.560960 | -0.111341 |
| 27 | 1  | 0 | 0.078464  | 0.448149  | -2.365849 |
| 28 | 6  | 0 | 1.575244  | -0.936431 | -1.630665 |
| 29 | 1  | 0 | 1.770670  | -1.792026 | -2.272078 |
| 30 | 6  | 0 | 2.644424  | -0.417645 | -0.885480 |
| 31 | 6  | 0 | 4.039109  | 0.662035  | 0.924503  |
| 32 | 6  | 0 | 4.839054  | 0.062975  | -0.217002 |
| 33 | 6  | 0 | 4.814332  | 1.788731  | 1.551362  |
| 34 | 6  | 0 | 6.160983  | -0.435589 | 0.306547  |
| 35 | 6  | 0 | 6.138722  | 1.591264  | 1.692808  |
| 36 | 1  | 0 | 4.304418  | 2.650772  | 1.966054  |
| 37 | 6  | 0 | 6.777725  | 0.364024  | 1.197305  |
| 38 | 1  | 0 | 6.635720  | -1.318927 | -0.104093 |
| 39 | 1  | 0 | 6.751258  | 2.321511  | 2.212132  |
| 40 | 1  | 0 | 7.774884  | 0.120897  | 1.550120  |
| 41 | 7  | 0 | 3.909380  | -0.869287 | -0.887567 |
| 42 | 16 | 0 | 2.390861  | 0.985969  | 0.155882  |
| 43 | 6  | 0 | 4.427607  | -1.978478 | -1.686336 |
| 44 | 1  | 0 | 3.621091  | -2.499416 | -2.193215 |
| 45 | 1  | 0 | 5.131926  | -1.591751 | -2.427433 |
| 46 | 1  | 0 | 4.941954  | -2.680648 | -1.028066 |
| 47 | 1  | 0 | 5.043705  | 0.858107  | -0.959749 |
| 48 | 1  | 0 | 3.857472  | -0.115876 | 1.682369  |

002hba\_mol\_b3lyp631dp\_+3H2\_ARBb\_PCMw.log

Standard orientation:

| Center<br>Number | Atomic<br>Number | Atomic<br>Type | Coordinates (Angstroms) |           |           |
|------------------|------------------|----------------|-------------------------|-----------|-----------|
|                  |                  |                | X                       | Y         | Z         |
| 1                | 6                | 0              | 6.287160                | 1.694817  | 0.094643  |
| 2                | 6                | 0              | 6.019683                | 0.336161  | 0.065012  |
| 3                | 6                | 0              | 4.696544                | -0.138030 | -0.062799 |
| 4                | 6                | 0              | 3.616529                | 0.791557  | -0.152959 |
| 5                | 6                | 0              | 3.938022                | 2.165414  | -0.119237 |
| 6                | 6                | 0              | 5.240564                | 2.620337  | 0.000756  |
| 7                | 1                | 0              | 7.313678                | 2.033604  | 0.192601  |
| 8                | 1                | 0              | 6.843443                | -0.360207 | 0.144309  |
| 9                | 6                | 0              | 2.224139                | 0.319051  | -0.277155 |
| 10               | 1                | 0              | 3.142464                | 2.896650  | -0.190018 |
| 11               | 1                | 0              | 5.444344                | 3.685805  | 0.023249  |
| 12               | 6                | 0              | 2.080384                | -1.110071 | -0.308902 |
| 13               | 6                | 0              | 3.149642                | -1.943587 | -0.224734 |
| 14               | 1                | 0              | 1.104462                | -1.566054 | -0.408605 |
| 15               | 1                | 0              | 3.025628                | -3.019516 | -0.251241 |
| 16               | 6                | 0              | 5.510669                | -2.515848 | 0.029146  |
| 17               | 6                | 0              | 5.925372                | -2.768621 | 1.479834  |
| 18               | 1                | 0              | 6.362414                | -2.207191 | -0.580939 |
| 19               | 1                | 0              | 5.130816                | -3.436853 | -0.417510 |
| 20               | 1                | 0              | 6.711453                | -3.528989 | 1.508402  |
| 21               | 1                | 0              | 6.309892                | -1.863088 | 1.956171  |
| 22               | 1                | 0              | 5.076156                | -3.130738 | 2.066408  |
| 23               | 7                | 0              | 4.440971                | -1.510009 | -0.107827 |
| 24               | 6                | 0              | 1.145842                | 1.190084  | -0.356492 |
| 25               | 6                | 0              | -0.220640               | 0.811174  | -0.469377 |
| 26               | 1                | 0              | 1.330966                | 2.258459  | -0.328765 |
| 27               | 1                | 0              | -0.459842               | -0.250486 | -0.490481 |
| 28               | 6                | 0              | -1.264419               | 1.687132  | -0.563384 |

|    |    |   |           |           |           |
|----|----|---|-----------|-----------|-----------|
| 29 | 1  | 0 | -1.071780 | 2.756691  | -0.575214 |
| 30 | 6  | 0 | -2.689602 | 1.297641  | -0.648817 |
| 31 | 6  | 0 | -4.497026 | -0.541232 | -0.628090 |
| 32 | 6  | 0 | -4.552003 | 0.147779  | 0.517663  |
| 33 | 6  | 0 | -5.530115 | -1.555883 | -1.031742 |
| 34 | 6  | 0 | -5.606154 | 0.010149  | 1.575458  |
| 35 | 6  | 0 | -6.378676 | -1.979511 | 0.180025  |
| 36 | 1  | 0 | -5.036660 | -2.425208 | -1.480472 |
| 37 | 6  | 0 | -6.813409 | -0.765823 | 1.011284  |
| 38 | 1  | 0 | -5.186429 | -0.510970 | 2.448415  |
| 39 | 1  | 0 | -7.254844 | -2.535237 | -0.167572 |
| 40 | 1  | 0 | -7.408503 | -0.090831 | 0.384562  |
| 41 | 7  | 0 | -3.345912 | 0.993692  | 0.745867  |
| 42 | 16 | 0 | -3.071469 | -0.218972 | -1.632733 |
| 43 | 6  | 0 | -3.571521 | 2.260045  | 1.514977  |
| 44 | 1  | 0 | -2.623049 | 2.793309  | 1.562570  |
| 45 | 1  | 0 | -4.321886 | 2.854718  | 0.995607  |
| 46 | 1  | 0 | -3.907330 | 2.012317  | 2.520066  |
| 47 | 1  | 0 | -5.937913 | 0.991746  | 1.931022  |
| 48 | 1  | 0 | -7.453796 | -1.079207 | 1.840860  |
| 49 | 1  | 0 | -5.794021 | -2.662999 | 0.807722  |
| 50 | 1  | 0 | -6.160744 | -1.121677 | -1.818663 |
| 51 | 1  | 0 | -2.656708 | 0.439854  | 1.272519  |
| 52 | 1  | 0 | -3.310053 | 2.107463  | -1.038213 |

002hca\_mol\_b3lyp631dp\_+4H2\_ARBb\_PCMw.log

Standard orientation:

| Center<br>Number | Atomic<br>Number | Atomic<br>Type | Coordinates (Angstroms) |           |           |
|------------------|------------------|----------------|-------------------------|-----------|-----------|
|                  |                  |                | X                       | Y         | Z         |
| 1                | 6                | 0              | 6.310738                | 1.654388  | 0.209200  |
| 2                | 6                | 0              | 6.026140                | 0.301441  | 0.123043  |
| 3                | 6                | 0              | 4.699876                | -0.149650 | -0.048095 |
| 4                | 6                | 0              | 3.633901                | 0.797326  | -0.123372 |
| 5                | 6                | 0              | 3.972459                | 2.164154  | -0.031160 |
| 6                | 6                | 0              | 5.278321                | 2.596805  | 0.130592  |
| 7                | 1                | 0              | 7.339472                | 1.975036  | 0.339770  |
| 8                | 1                | 0              | 6.839074                | -0.408651 | 0.192191  |
| 9                | 6                | 0              | 2.237508                | 0.349020  | -0.291702 |
| 10               | 1                | 0              | 3.187638                | 2.908136  | -0.088280 |
| 11               | 1                | 0              | 5.495120                | 3.657847  | 0.197555  |
| 12               | 6                | 0              | 2.075890                | -1.076979 | -0.374835 |
| 13               | 6                | 0              | 3.132263                | -1.927168 | -0.302764 |
| 14               | 1                | 0              | 1.095814                | -1.515454 | -0.506809 |
| 15               | 1                | 0              | 2.994897                | -2.999779 | -0.369542 |
| 16               | 6                | 0              | 5.481744                | -2.540033 | -0.035581 |
| 17               | 6                | 0              | 5.865689                | -2.858858 | 1.410570  |
| 18               | 1                | 0              | 6.348747                | -2.217658 | -0.616399 |
| 19               | 1                | 0              | 5.099226                | -3.436633 | -0.527490 |
| 20               | 1                | 0              | 6.640585                | -3.631091 | 1.422235  |
| 21               | 1                | 0              | 6.253207                | -1.979358 | 1.931210  |
| 22               | 1                | 0              | 5.000417                | -3.232489 | 1.965631  |
| 23               | 7                | 0              | 4.427727                | -1.515502 | -0.149911 |
| 24               | 6                | 0              | 1.172756                | 1.235945  | -0.363013 |
| 25               | 6                | 0              | -0.196820               | 0.877875  | -0.515326 |
| 26               | 1                | 0              | 1.370939                | 2.300393  | -0.296728 |
| 27               | 1                | 0              | -0.450867               | -0.178394 | -0.578021 |
| 28               | 6                | 0              | -1.228422               | 1.766481  | -0.603440 |
| 29               | 1                | 0              | -1.024008               | 2.834302  | -0.584108 |
| 30               | 6                | 0              | -2.660619               | 1.394412  | -0.714205 |
| 31               | 6                | 0              | -4.191233               | -0.837347 | -0.459087 |
| 32               | 6                | 0              | -4.600881               | 0.336603  | 0.425915  |
| 33               | 6                | 0              | -5.434017               | -1.546198 | -1.000651 |
| 34               | 6                | 0              | -5.357881               | -0.146869 | 1.661746  |

|    |    |   |           |           |           |
|----|----|---|-----------|-----------|-----------|
| 35 | 6  | 0 | -6.273023 | -2.046011 | 0.192735  |
| 36 | 1  | 0 | -5.142731 | -2.384777 | -1.640135 |
| 37 | 6  | 0 | -6.608328 | -0.918797 | 1.184515  |
| 38 | 1  | 0 | -4.714371 | -0.800306 | 2.263618  |
| 39 | 1  | 0 | -7.197753 | -2.501503 | -0.176081 |
| 40 | 1  | 0 | -7.299934 | -0.210206 | 0.711223  |
| 41 | 7  | 0 | -3.327768 | 1.111712  | 0.679064  |
| 42 | 16 | 0 | -3.038427 | -0.126652 | -1.716772 |
| 43 | 6  | 0 | -3.503992 | 2.371320  | 1.467080  |
| 44 | 1  | 0 | -2.540017 | 2.874964  | 1.521571  |
| 45 | 1  | 0 | -4.235353 | 3.000482  | 0.960215  |
| 46 | 1  | 0 | -3.847996 | 2.120288  | 2.468729  |
| 47 | 1  | 0 | -5.231997 | 1.024916  | -0.146923 |
| 48 | 1  | 0 | -3.615419 | -1.552749 | 0.138909  |
| 49 | 1  | 0 | -5.661763 | 0.693913  | 2.291713  |
| 50 | 1  | 0 | -7.127428 | -1.326962 | 2.057063  |
| 51 | 1  | 0 | -5.718104 | -2.837274 | 0.712958  |
| 52 | 1  | 0 | -6.015159 | -0.850546 | -1.617858 |
| 53 | 1  | 0 | -2.669019 | 0.514965  | 1.191451  |
| 54 | 1  | 0 | -3.250504 | 2.224401  | -1.106381 |

003aaa\_Me\_benziazol\_B3LYP631dp\_PCMw\_opt.log

Standard orientation:

| Center<br>Number | Atomic<br>Number | Atomic<br>Type | Coordinates (Angstroms) |           |           |
|------------------|------------------|----------------|-------------------------|-----------|-----------|
|                  |                  |                | X                       | Y         | Z         |
| 1                | 6                | 0              | 3.214380                | -0.199092 | -0.000013 |
| 2                | 1                | 0              | 3.587873                | 0.320104  | -0.887917 |
| 3                | 6                | 0              | 1.724879                | -0.229559 | -0.000008 |
| 4                | 6                | 0              | -0.680520               | -0.829806 | 0.000009  |
| 5                | 6                | 0              | -0.437162               | 0.552109  | -0.000008 |
| 6                | 6                | 0              | -1.982172               | -1.335323 | 0.000016  |
| 7                | 6                | 0              | -1.490681               | 1.471843  | -0.000019 |
| 8                | 6                | 0              | -3.028966               | -0.419666 | 0.000006  |
| 9                | 1                | 0              | -2.167464               | -2.403155 | 0.000039  |
| 10               | 6                | 0              | -2.784806               | 0.965061  | -0.000017 |
| 11               | 1                | 0              | -1.309593               | 2.539845  | -0.000008 |
| 12               | 1                | 0              | -4.051163               | -0.782148 | 0.000019  |
| 13               | 1                | 0              | -3.621921               | 1.654382  | -0.000023 |
| 14               | 7                | 0              | 0.937503                | 0.841523  | -0.000012 |
| 15               | 16               | 0              | 0.839096                | -1.704489 | -0.000002 |
| 16               | 6                | 0              | 1.423939                | 2.230672  | 0.000029  |
| 17               | 1                | 0              | 2.509627                | 2.239302  | 0.000054  |
| 18               | 1                | 0              | 1.055104                | 2.734711  | -0.894307 |
| 19               | 1                | 0              | 1.055065                | 2.734662  | 0.894380  |
| 20               | 1                | 0              | 3.613171                | -1.213339 | -0.000423 |
| 21               | 1                | 0              | 3.587895                | 0.319366  | 0.888318  |

003aba\_Me\_benziazol\_1H2Ar\_B3LYP631dp\_PCMw\_opt.log

Standard orientation:

| Center<br>Number | Atomic<br>Number | Atomic<br>Type | Coordinates (Angstroms) |           |           |
|------------------|------------------|----------------|-------------------------|-----------|-----------|
|                  |                  |                | X                       | Y         | Z         |
| 1                | 6                | 0              | 3.234446                | -0.196586 | -0.046734 |
| 2                | 1                | 0              | 3.572667                | 0.239810  | -0.992382 |
| 3                | 6                | 0              | 1.744387                | -0.216168 | -0.003841 |
| 4                | 6                | 0              | -0.682784               | -0.802774 | -0.348003 |
| 5                | 6                | 0              | -0.440975               | 0.542202  | 0.308616  |
| 6                | 6                | 0              | -2.022201               | -1.338223 | 0.078715  |
| 7                | 6                | 0              | -1.526424               | 1.497287  | -0.113697 |
| 8                | 6                | 0              | -3.020300               | -0.435914 | 0.137272  |

|    |    |   |           |           |           |
|----|----|---|-----------|-----------|-----------|
| 9  | 1  | 0 | -2.184262 | -2.402090 | 0.206318  |
| 10 | 6  | 0 | -2.772714 | 0.987358  | -0.135355 |
| 11 | 1  | 0 | -1.326598 | 2.551838  | -0.263975 |
| 12 | 1  | 0 | -4.035946 | -0.754156 | 0.349985  |
| 13 | 1  | 0 | -3.623031 | 1.631625  | -0.334416 |
| 14 | 7  | 0 | 0.984654  | 0.853135  | 0.027397  |
| 15 | 16 | 0 | 0.877297  | -1.724194 | 0.025142  |
| 16 | 6  | 0 | 1.461723  | 2.239144  | 0.044992  |
| 17 | 1  | 0 | 2.544706  | 2.265437  | -0.038794 |
| 18 | 1  | 0 | 1.022196  | 2.777237  | -0.796534 |
| 19 | 1  | 0 | 1.154943  | 2.709952  | 0.982204  |
| 20 | 1  | 0 | 3.630821  | -1.209027 | 0.023026  |
| 21 | 1  | 0 | 3.637205  | 0.402994  | 0.774166  |
| 22 | 1  | 0 | -0.496440 | 0.421603  | 1.406376  |
| 23 | 1  | 0 | -0.676540 | -0.678022 | -1.441815 |

-----  
003aca\_Me\_benziazol\_3H2Ar\_B3LYP631dp\_PCMw\_opt.log

Standard orientation:

| Center<br>Number | Atomic<br>Number | Atomic<br>Type | Coordinates (Angstroms) |           |           |
|------------------|------------------|----------------|-------------------------|-----------|-----------|
|                  |                  |                | X                       | Y         | Z         |
| 1                | 6                | 0              | -3.307152               | -0.229372 | 0.303573  |
| 2                | 1                | 0              | -3.865054               | 0.686944  | 0.095864  |
| 3                | 6                | 0              | -1.922526               | -0.181042 | -0.314746 |
| 4                | 6                | 0              | 0.545221                | -0.797906 | -0.065462 |
| 5                | 6                | 0              | 0.390063                | 0.522979  | 0.070379  |
| 6                | 6                | 0              | 1.887946                | -1.466552 | -0.154715 |
| 7                | 6                | 0              | 1.490976                | 1.533536  | 0.182521  |
| 8                | 6                | 0              | 2.997755                | -0.520520 | 0.336588  |
| 9                | 1                | 0              | 1.878056                | -2.390380 | 0.434015  |
| 10               | 6                | 0              | 2.827788                | 0.890196  | -0.240903 |
| 11               | 1                | 0              | 1.294098                | 2.406163  | -0.449231 |
| 12               | 1                | 0              | 2.972657                | -0.474235 | 1.431992  |
| 13               | 1                | 0              | 3.648825                | 1.537239  | 0.080556  |
| 14               | 7                | 0              | -1.041687               | 0.922933  | 0.271402  |
| 15               | 16               | 0              | -0.960935               | -1.733453 | -0.074347 |
| 16               | 6                | 0              | -1.402721               | 2.275751  | -0.279923 |
| 17               | 1                | 0              | -1.175376               | 2.285775  | -1.344706 |
| 18               | 1                | 0              | -2.463585               | 2.446877  | -0.108986 |
| 19               | 1                | 0              | -0.822932               | 3.031731  | 0.245084  |
| 20               | 1                | 0              | -3.261989               | -0.391568 | 1.383600  |
| 21               | 1                | 0              | -3.862420               | -1.057012 | -0.144104 |
| 22               | 1                | 0              | 1.550500                | 1.902315  | 1.216825  |
| 23               | 1                | 0              | 2.867171                | 0.842072  | -1.335614 |
| 24               | 1                | 0              | 3.972484                | -0.930330 | 0.055598  |
| 25               | 1                | 0              | 2.061148                | -1.767511 | -1.196108 |
| 26               | 1                | 0              | -1.210741               | 0.954721  | 1.286736  |
| 27               | 1                | 0              | -1.960176               | 0.029480  | -1.385640 |

-----  
003ada\_Me\_benziazol\_4H2Ar\_B3LYP631dp\_PCMw\_opt.log

Standard orientation:

| Center<br>Number | Atomic<br>Number | Atomic<br>Type | Coordinates (Angstroms) |           |           |
|------------------|------------------|----------------|-------------------------|-----------|-----------|
|                  |                  |                | X                       | Y         | Z         |
| 1                | 6                | 0              | -3.248253               | -0.263325 | 0.530243  |
| 2                | 1                | 0              | -3.841589               | 0.650469  | 0.435435  |
| 3                | 6                | 0              | -1.976566               | -0.190638 | -0.297829 |
| 4                | 6                | 0              | 0.562699                | -0.848182 | 0.301370  |
| 5                | 6                | 0              | 0.371997                | 0.575679  | -0.207149 |
| 6                | 6                | 0              | 1.881428                | -1.422227 | -0.221578 |
| 7                | 6                | 0              | 1.457912                | 1.505025  | 0.329931  |

|    |    |   |           |           |           |
|----|----|---|-----------|-----------|-----------|
| 8  | 6  | 0 | 3.036136  | -0.520184 | 0.258037  |
| 9  | 1  | 0 | 2.017943  | -2.444609 | 0.142636  |
| 10 | 6  | 0 | 2.825742  | 0.952726  | -0.130488 |
| 11 | 1  | 0 | 1.328150  | 2.523961  | -0.044877 |
| 12 | 1  | 0 | 3.126212  | -0.602208 | 1.348649  |
| 13 | 1  | 0 | 3.618671  | 1.572850  | 0.298052  |
| 14 | 7  | 0 | -1.058161 | 0.944344  | 0.162860  |
| 15 | 16 | 0 | -0.965739 | -1.746518 | -0.212791 |
| 16 | 6  | 0 | -1.496853 | 2.278837  | -0.370214 |
| 17 | 1  | 0 | -1.360362 | 2.279607  | -1.450807 |
| 18 | 1  | 0 | -2.544032 | 2.433096  | -0.118635 |
| 19 | 1  | 0 | -0.892101 | 3.056410  | 0.091885  |
| 20 | 1  | 0 | -3.027215 | -0.448248 | 1.584813  |
| 21 | 1  | 0 | -3.858913 | -1.090557 | 0.161565  |
| 22 | 1  | 0 | 0.382938  | 0.580324  | -1.301853 |
| 23 | 1  | 0 | 0.592002  | -0.840782 | 1.396665  |
| 24 | 1  | 0 | 1.412656  | 1.542041  | 1.425259  |
| 25 | 1  | 0 | 2.898991  | 1.058014  | -1.220310 |
| 26 | 1  | 0 | 3.979184  | -0.882760 | -0.163286 |
| 27 | 1  | 0 | 1.854467  | -1.465228 | -1.316880 |
| 28 | 1  | 0 | -1.115112 | 0.984025  | 1.187185  |
| 29 | 1  | 0 | -2.198401 | 0.021218  | -1.344791 |

-----  
003baa\_mol\_b3lyp631dp\_PCMw.log

Standard orientation:

| Center<br>Number | Atomic<br>Number | Atomic<br>Type | Coordinates (Angstroms) |           |           |
|------------------|------------------|----------------|-------------------------|-----------|-----------|
|                  |                  |                | X                       | Y         | Z         |
| 1                | 6                | 0              | -0.260720               | 2.758048  | -0.107932 |
| 2                | 6                | 0              | 0.687008                | 1.762771  | -0.227697 |
| 3                | 6                | 0              | 0.291983                | 0.407425  | -0.177565 |
| 4                | 6                | 0              | -1.087623               | 0.071421  | -0.000298 |
| 5                | 6                | 0              | -2.026637               | 1.129772  | 0.118044  |
| 6                | 6                | 0              | -1.625016               | 2.444799  | 0.066054  |
| 7                | 1                | 0              | 0.053454                | 3.795399  | -0.149185 |
| 8                | 1                | 0              | 1.724778                | 2.035261  | -0.357459 |
| 9                | 6                | 0              | -1.485591               | -1.300718 | 0.050736  |
| 10               | 1                | 0              | -3.074511               | 0.890529  | 0.249473  |
| 11               | 1                | 0              | -2.354934               | 3.241497  | 0.157633  |
| 12               | 6                | 0              | -0.500200               | -2.265549 | -0.080043 |
| 13               | 6                | 0              | 0.829826                | -1.898356 | -0.255319 |
| 14               | 1                | 0              | -0.742199               | -3.320687 | -0.053146 |
| 15               | 1                | 0              | 1.609044                | -2.642418 | -0.361516 |
| 16               | 6                | 0              | 2.677720                | -0.335116 | -0.456408 |
| 17               | 6                | 0              | 3.354970                | -0.023359 | 0.876112  |
| 18               | 1                | 0              | 2.784356                | 0.476914  | -1.175440 |
| 19               | 1                | 0              | 3.114662                | -1.223114 | -0.912881 |
| 20               | 1                | 0              | 4.416760                | 0.160861  | 0.692905  |
| 21               | 1                | 0              | 2.932610                | 0.862543  | 1.355447  |
| 22               | 1                | 0              | 3.266204                | -0.867801 | 1.564391  |
| 23               | 7                | 0              | 1.220327                | -0.619891 | -0.303406 |
| 24               | 6                | 0              | -2.920490               | -1.698241 | 0.237082  |
| 25               | 1                | 0              | -3.544138               | -1.299799 | -0.569815 |
| 26               | 1                | 0              | -3.023755               | -2.783800 | 0.248165  |
| 27               | 1                | 0              | -3.316002               | -1.303536 | 1.178669  |

-----  
003bba\_mol\_1H2Ar\_b3lyp631dp\_PCMw.log

Standard orientation:

| Center<br>Number | Atomic<br>Number | Atomic<br>Type | Coordinates (Angstroms) |   |   |
|------------------|------------------|----------------|-------------------------|---|---|
|                  |                  |                | X                       | Y | Z |

|    |   |   |           |           |           |
|----|---|---|-----------|-----------|-----------|
| 1  | 6 | 0 | -0.151563 | 2.765219  | -0.105704 |
| 2  | 6 | 0 | 0.745624  | 1.787584  | -0.311852 |
| 3  | 6 | 0 | 0.240884  | 0.380824  | -0.537084 |
| 4  | 6 | 0 | -0.992739 | 0.087359  | 0.328967  |
| 5  | 6 | 0 | -2.003619 | 1.206833  | 0.172198  |
| 6  | 6 | 0 | -1.580287 | 2.467853  | -0.006385 |
| 7  | 1 | 0 | 0.176421  | 3.797469  | -0.034602 |
| 8  | 1 | 0 | 1.793613  | 2.020691  | -0.446869 |
| 9  | 6 | 0 | -1.494388 | -1.321678 | 0.076643  |
| 10 | 1 | 0 | -3.056207 | 0.984184  | 0.302094  |
| 11 | 1 | 0 | -2.291246 | 3.286785  | -0.051108 |
| 12 | 6 | 0 | -0.570555 | -2.266319 | -0.242724 |
| 13 | 6 | 0 | 0.816474  | -1.929733 | -0.290505 |
| 14 | 1 | 0 | -0.836990 | -3.310739 | -0.350135 |
| 15 | 1 | 0 | 1.563205  | -2.717887 | -0.265596 |
| 16 | 6 | 0 | 2.713911  | -0.426548 | -0.362176 |
| 17 | 6 | 0 | 3.245410  | -0.016757 | 1.010907  |
| 18 | 1 | 0 | 2.897627  | 0.340091  | -1.116732 |
| 19 | 1 | 0 | 3.202692  | -1.339538 | -0.705760 |
| 20 | 1 | 0 | 4.317073  | 0.183424  | 0.927971  |
| 21 | 1 | 0 | 2.755804  | 0.884149  | 1.387493  |
| 22 | 1 | 0 | 3.098614  | -0.821300 | 1.736106  |
| 23 | 7 | 0 | 1.256745  | -0.702198 | -0.346454 |
| 24 | 6 | 0 | -2.928900 | -1.663123 | 0.297713  |
| 25 | 1 | 0 | -3.560646 | -1.144480 | -0.433585 |
| 26 | 1 | 0 | -3.102944 | -2.736362 | 0.211646  |
| 27 | 1 | 0 | -3.257719 | -1.326374 | 1.288113  |
| 28 | 1 | 0 | -0.678934 | 0.094590  | 1.393939  |
| 29 | 1 | 0 | -0.059088 | 0.291609  | -1.597785 |

-----

003bca\_mol\_5H2Ar\_b3lyp631dp\_PCMw.log

Standard orientation:

| Center<br>Number | Atomic<br>Number | Atomic<br>Type | Coordinates (Angstroms) |           |           |
|------------------|------------------|----------------|-------------------------|-----------|-----------|
|                  |                  |                | X                       | Y         | Z         |
| 1                | 6                | 0              | 0.381555                | 2.751510  | -0.515446 |
| 2                | 6                | 0              | -0.757968               | 1.735959  | -0.352972 |
| 3                | 6                | 0              | -0.243780               | 0.342962  | -0.070778 |
| 4                | 6                | 0              | 1.039586                | 0.021278  | 0.163905  |
| 5                | 6                | 0              | 2.061242                | 1.125741  | 0.362312  |
| 6                | 6                | 0              | 1.451910                | 2.516545  | 0.548854  |
| 7                | 1                | 0              | 0.828972                | 2.644884  | -1.511216 |
| 8                | 1                | 0              | -1.428928               | 2.070196  | 0.447971  |
| 9                | 6                | 0              | 1.570607                | -1.402162 | 0.257906  |
| 10               | 1                | 0              | 2.682463                | 0.858367  | 1.226727  |
| 11               | 1                | 0              | 2.238494                | 3.275327  | 0.489038  |
| 12               | 6                | 0              | 0.533171                | -2.402191 | -0.258342 |
| 13               | 6                | 0              | -0.831188               | -2.086533 | 0.309685  |
| 14               | 1                | 0              | 0.499100                | -2.384750 | -1.354985 |
| 15               | 1                | 0              | -0.807276               | -2.048082 | 1.401243  |
| 16               | 6                | 0              | -2.602464               | -0.376013 | 0.610984  |
| 17               | 6                | 0              | -3.694163               | 0.204673  | -0.274534 |
| 18               | 1                | 0              | -2.315834               | 0.283854  | 1.429329  |
| 19               | 1                | 0              | -2.945412               | -1.315896 | 1.042819  |
| 20               | 1                | 0              | -4.594818               | 0.319817  | 0.334581  |
| 21               | 1                | 0              | -3.441104               | 1.181982  | -0.686208 |
| 22               | 1                | 0              | -3.937739               | -0.475203 | -1.096916 |
| 23               | 7                | 0              | -1.307398               | -0.722178 | -0.149199 |
| 24               | 6                | 0              | 2.907510                | -1.592007 | -0.482513 |
| 25               | 1                | 0              | 3.708325                | -0.985807 | -0.054288 |
| 26               | 1                | 0              | 3.213183                | -2.640432 | -0.414862 |
| 27               | 1                | 0              | 2.810527                | -1.336393 | -1.542931 |
| 28               | 1                | 0              | 2.741302                | 1.133968  | -0.499244 |
| 29               | 1                | 0              | 1.002930                | 2.597046  | 1.547012  |

|    |   |   |           |           |           |
|----|---|---|-----------|-----------|-----------|
| 30 | 1 | 0 | -0.029085 | 3.763759  | -0.454672 |
| 31 | 1 | 0 | -1.358929 | 1.717648  | -1.270938 |
| 32 | 1 | 0 | -1.596621 | -2.797885 | -0.003182 |
| 33 | 1 | 0 | 0.801872  | -3.421399 | 0.034907  |
| 34 | 1 | 0 | 1.751748  | -1.609394 | 1.323661  |
| 35 | 1 | 0 | -1.567486 | -0.814942 | -1.137816 |

003bda\_mol\_6H2Ar\_b3lyp631dp\_PCMw.log

Standard orientation:

| Center Number | Atomic Number | Atomic Type | Coordinates (Angstroms) |           |           |
|---------------|---------------|-------------|-------------------------|-----------|-----------|
|               |               |             | X                       | Y         | Z         |
| 1             | 6             | 0           | 1.549449                | 2.428236  | -0.590027 |
| 2             | 6             | 0           | 0.078598                | 2.033030  | -0.340427 |
| 3             | 6             | 0           | -0.060882               | 0.611146  | 0.261452  |
| 4             | 6             | 0           | 1.101656                | -0.304143 | -0.177335 |
| 5             | 6             | 0           | 2.429186                | 0.275338  | 0.388234  |
| 6             | 6             | 0           | 2.454466                | 1.816461  | 0.480541  |
| 7             | 1             | 0           | 1.870023                | 2.083186  | -1.579953 |
| 8             | 1             | 0           | -0.377113               | 2.758486  | 0.338816  |
| 9             | 6             | 0           | 0.914558                | -1.782834 | 0.224854  |
| 10            | 1             | 0           | 2.614209                | -0.158062 | 1.378224  |
| 11            | 1             | 0           | 3.481714                | 2.179232  | 0.375955  |
| 12            | 6             | 0           | -0.463411               | -2.281103 | -0.223299 |
| 13            | 6             | 0           | -1.584348               | -1.413520 | 0.322046  |
| 14            | 1             | 0           | -0.519147               | -2.317695 | -1.319349 |
| 15            | 1             | 0           | -1.589889               | -1.396898 | 1.414891  |
| 16            | 6             | 0           | -2.580014               | 0.887133  | 0.379355  |
| 17            | 6             | 0           | -3.937075               | 0.465928  | -0.168169 |
| 18            | 1             | 0           | -2.358523               | 1.907389  | 0.074228  |
| 19            | 1             | 0           | -2.542626               | 0.836125  | 1.469577  |
| 20            | 1             | 0           | -4.665359               | 1.225098  | 0.128517  |
| 21            | 1             | 0           | -3.933316               | 0.421235  | -1.261602 |
| 22            | 1             | 0           | -4.281357               | -0.491464 | 0.226577  |
| 23            | 7             | 0           | -1.429576               | 0.025946  | -0.121389 |
| 24            | 6             | 0           | 2.024208                | -2.683811 | -0.332321 |
| 25            | 1             | 0           | 3.008663                | -2.404871 | 0.051329  |
| 26            | 1             | 0           | 1.843222                | -3.727052 | -0.054554 |
| 27            | 1             | 0           | 2.059355                | -2.629774 | -1.426704 |
| 28            | 1             | 0           | 1.146624                | -0.262588 | -1.275680 |
| 29            | 1             | 0           | -0.091906               | 0.656840  | 1.355093  |
| 30            | 1             | 0           | 3.243524                | -0.064558 | -0.258077 |
| 31            | 1             | 0           | 2.110705                | 2.144197  | 1.469768  |
| 32            | 1             | 0           | 1.627123                | 3.519515  | -0.600079 |
| 33            | 1             | 0           | -0.473611               | 2.089104  | -1.286389 |
| 34            | 1             | 0           | -2.557753               | -1.753598 | -0.028002 |
| 35            | 1             | 0           | -0.635575               | -3.302811 | 0.130790  |
| 36            | 1             | 0           | 0.946250                | -1.834929 | 1.323358  |
| 37            | 1             | 0           | -1.476558               | 0.031104  | -1.146448 |

010aaa\_intermed\_TD\_b3lyp631dp\_opt\_S0\_opt\_2.log

Standard orientation:

| Center Number | Atomic Number | Atomic Type | Coordinates (Angstroms) |           |           |
|---------------|---------------|-------------|-------------------------|-----------|-----------|
|               |               |             | X                       | Y         | Z         |
| 1             | 6             | 0           | -4.494377               | -0.670901 | -0.588871 |
| 2             | 6             | 0           | -4.600696               | 0.714327  | -0.366997 |
| 3             | 6             | 0           | -3.512532               | 1.443358  | 0.162065  |
| 4             | 6             | 0           | -2.308407               | 0.769102  | 0.404964  |
| 5             | 6             | 0           | -2.189459               | -0.613147 | 0.149954  |
| 6             | 6             | 0           | -3.278026               | -1.347636 | -0.349018 |



|    |   |   |           |           |           |
|----|---|---|-----------|-----------|-----------|
| 7  | 6 | 0 | -3.167572 | -2.822785 | -0.674449 |
| 8  | 1 | 0 | -2.139332 | -3.176006 | -0.659507 |
| 9  | 1 | 0 | -3.718729 | -3.429175 | 0.054078  |
| 10 | 1 | 0 | -3.589788 | -3.035976 | -1.660856 |
| 11 | 6 | 0 | -5.696807 | -1.443053 | -1.092290 |
| 12 | 1 | 0 | -5.773165 | -1.407113 | -2.187464 |
| 13 | 1 | 0 | -5.651920 | -2.494570 | -0.807491 |
| 14 | 1 | 0 | -6.628866 | -1.039148 | -0.691830 |
| 15 | 6 | 0 | -5.897996 | 1.427378  | -0.688217 |
| 16 | 1 | 0 | -6.363866 | 1.022257  | -1.589328 |
| 17 | 1 | 0 | -6.628412 | 1.326421  | 0.125779  |
| 18 | 1 | 0 | -5.746098 | 2.494047  | -0.854265 |
| 19 | 6 | 0 | -3.683358 | 2.910534  | 0.500813  |
| 20 | 1 | 0 | -3.735925 | 3.526957  | -0.404402 |
| 21 | 1 | 0 | -4.607248 | 3.076705  | 1.062545  |
| 22 | 1 | 0 | -2.858964 | 3.295752  | 1.097858  |
| 23 | 6 | 0 | -0.885158 | -1.299425 | 0.416653  |
| 24 | 8 | 0 | -0.744590 | -2.347747 | 1.000554  |
| 25 | 8 | 0 | 0.134928  | -0.578613 | -0.152016 |
| 26 | 6 | 0 | -1.146018 | 1.468763  | 1.048762  |
| 27 | 8 | 0 | -0.636482 | 1.130580  | 2.095348  |
| 28 | 8 | 0 | -0.704121 | 2.536131  | 0.339620  |
| 29 | 1 | 0 | 0.028240  | 2.913162  | 0.858315  |
| 30 | 6 | 0 | 1.488790  | -0.812663 | 0.025771  |
| 31 | 6 | 0 | 2.284172  | 0.232115  | -0.443300 |
| 32 | 6 | 0 | 2.053827  | -1.971288 | 0.585361  |
| 33 | 6 | 0 | 3.667087  | 0.123064  | -0.345822 |
| 34 | 1 | 0 | 1.828648  | 1.115602  | -0.873763 |
| 35 | 6 | 0 | 3.436835  | -2.053165 | 0.671183  |
| 36 | 1 | 0 | 1.421416  | -2.767721 | 0.943919  |
| 37 | 6 | 0 | 4.272319  | -1.020299 | 0.213391  |
| 38 | 1 | 0 | 3.890625  | -2.940220 | 1.103973  |
| 39 | 6 | 0 | 5.810930  | 1.177546  | -0.763487 |
| 40 | 6 | 0 | 5.710184  | -1.046065 | 0.275214  |
| 41 | 6 | 0 | 6.440601  | -0.005923 | -0.187456 |
| 42 | 1 | 0 | 6.199031  | -1.918288 | 0.702036  |
| 43 | 1 | 0 | 7.523138  | 0.009526  | -0.156515 |
| 44 | 8 | 0 | 4.411697  | 1.167512  | -0.809913 |
| 45 | 8 | 0 | 6.379216  | 2.150733  | -1.197146 |

-----  
010aaa\_intermed\_TD\_b3lyp631dp\_opt\_S0\_opt\_3.log

Standard orientation:

| Center<br>Number | Atomic<br>Number | Atomic<br>Type | Coordinates (Angstroms) |           |           |
|------------------|------------------|----------------|-------------------------|-----------|-----------|
|                  |                  |                | X                       | Y         | Z         |
| 1                | 6                | 0              | -4.381692               | -1.071046 | 0.297567  |
| 2                | 6                | 0              | -4.740500               | 0.244967  | -0.047503 |
| 3                | 6                | 0              | -3.757128               | 1.250423  | -0.175332 |
| 4                | 6                | 0              | -2.407865               | 0.892811  | -0.022865 |
| 5                | 6                | 0              | -2.047839               | -0.433647 | 0.294957  |
| 6                | 6                | 0              | -3.024658               | -1.426453 | 0.463297  |
| 7                | 6                | 0              | -2.653666               | -2.861582 | 0.776351  |
| 8                | 1                | 0              | -1.580754               | -3.032919 | 0.727827  |
| 9                | 1                | 0              | -2.969864               | -3.137412 | 1.788981  |
| 10               | 1                | 0              | -3.143475               | -3.552847 | 0.083466  |
| 11               | 6                | 0              | -5.464847               | -2.111612 | 0.495201  |
| 12               | 1                | 0              | -5.816261               | -2.516556 | -0.463255 |
| 13               | 1                | 0              | -5.118191               | -2.954015 | 1.093019  |
| 14               | 1                | 0              | -6.335526               | -1.689833 | 1.003117  |
| 15               | 6                | 0              | -6.198513               | 0.590596  | -0.271535 |
| 16               | 1                | 0              | -6.747301               | -0.248688 | -0.703041 |
| 17               | 1                | 0              | -6.702571               | 0.857681  | 0.667193  |
| 18               | 1                | 0              | -6.314610               | 1.435825  | -0.951096 |
| 19               | 6                | 0              | -4.188203               | 2.684053  | -0.412163 |

|    |   |   |           |           |           |
|----|---|---|-----------|-----------|-----------|
| 20 | 1 | 0 | -4.485240 | 2.846968  | -1.455194 |
| 21 | 1 | 0 | -5.046570 | 2.938460  | 0.215478  |
| 22 | 1 | 0 | -3.394829 | 3.395813  | -0.195110 |
| 23 | 6 | 0 | -0.599806 | -0.790886 | 0.454135  |
| 24 | 8 | 0 | -0.101474 | -1.331036 | 1.408357  |
| 25 | 8 | 0 | 0.096424  | -0.484968 | -0.697508 |
| 26 | 6 | 0 | -1.303625 | 1.901487  | -0.096764 |
| 27 | 8 | 0 | -0.404836 | 1.995228  | 0.715601  |
| 28 | 8 | 0 | -1.376005 | 2.711610  | -1.177980 |
| 29 | 1 | 0 | -0.613352 | 3.312015  | -1.108480 |
| 30 | 6 | 0 | 1.482502  | -0.603250 | -0.702376 |
| 31 | 6 | 0 | 2.263886  | 0.124062  | 0.187209  |
| 32 | 6 | 0 | 2.044594  | -1.417072 | -1.693665 |
| 33 | 6 | 0 | 3.649836  | 0.018115  | 0.076035  |
| 34 | 1 | 0 | 1.817066  | 0.762004  | 0.938761  |
| 35 | 6 | 0 | 3.424287  | -1.505290 | -1.789730 |
| 36 | 1 | 0 | 1.391066  | -1.959014 | -2.367485 |
| 37 | 6 | 0 | 4.254860  | -0.792841 | -0.906062 |
| 38 | 1 | 0 | 3.879112  | -2.131003 | -2.552147 |
| 39 | 6 | 0 | 5.797791  | 0.732339  | 0.949521  |
| 40 | 6 | 0 | 5.693947  | -0.833343 | -0.939207 |
| 41 | 6 | 0 | 6.426621  | -0.113028 | -0.060520 |
| 42 | 1 | 0 | 6.181104  | -1.455578 | -1.685944 |
| 43 | 1 | 0 | 7.509720  | -0.119652 | -0.056282 |
| 44 | 8 | 0 | 4.399579  | 0.742823  | 0.955531  |
| 45 | 8 | 0 | 6.370137  | 1.413334  | 1.766112  |

---

## References

- 1 D. J. F. M.J. Frisch, G.W. Trucks, H.B. Schlegel, G.E. Scuseria, M.A. Robb, J.R. Cheeseman, G. Scalmani, V. Barone, B. Mennucci, G.A. Petersson, H. Nakatsuji, M. Caricato, X. Li, H.P. Hratchian, A.F. Izmaylov, J. Bloino, G. Zheng, J.L. Sonnenberg, M. Hada, M. Ehara, *Gaussian 16, Revis. C.01, Gaussian Inc Wallingford CT. (2016)*.
- 2 Y. Zhao and D. G. Truhlar, *Theor. Chem. Acc.*, 2008, **120**, 215–241.
- 3 A. D. Becke, *J. Chem. Phys.*, 1993, **98**, 5648–5652.
- 4 J. Tomasi, B. Mennucci and R. Cammi, *Chem. Rev.*, 2005, **105**, 2999–3094.
- 5 Z. Mucsi, B. Viskolcz and I. G. Csizmadia, *J. Phys. Chem. A*, 2007, **111**, 1123–1132.
- 6 Z. Mucsi, G. A. Chass, B. Viskolcz and I. G. Csizmadia, *J. Phys. Chem. A*, 2009, **113**, 7953–7962.
- 7 P. von R. Schleyer, C. Maerker, A. Dransfeld, H. Jiao and N. J. R. van Eikema Hommes, *J. Am. Chem. Soc.*, 1996, **118**, 6317–6318.
- 8 C. A. Schneider, W. S. Rasband and K. W. Eliceiri, *Nat. Methods*, 2012, **9**, 671–675.
- 9 G. Grabner, K. Rechthaler, B. Mayer, G. Köhler and K. Rotkiewicz, *J. Phys. Chem. A*, 2000, **104**, 1365–1376.
- 10 C. Bahou, D. A. Richards, A. Maruani, E. A. Love, F. Javaid, S. Caddick, J. R. Baker and V. Chudasama, *Org. Biomol. Chem.*, 2018, **16**, 1359–1366.
